# Supplementary material for: Inter-domain dynamics in the chaperone SurA and multi-site binding to its outer membrane protein clients
Source: PubMed Central journal article supplement (PMC7195389; doi:10.1038/s41467-020-15702-1), 2020-05-01

XL-MS spectra of intra-domain crosslinks detected in DSBU crosslinked SurA.

theor.Mass(M+H+):3245.749  
 PrecursorMass(M+H+):3245.74  
 Deviation:-2.79ppm  
 m/z:812.1905  
 Charge:+4

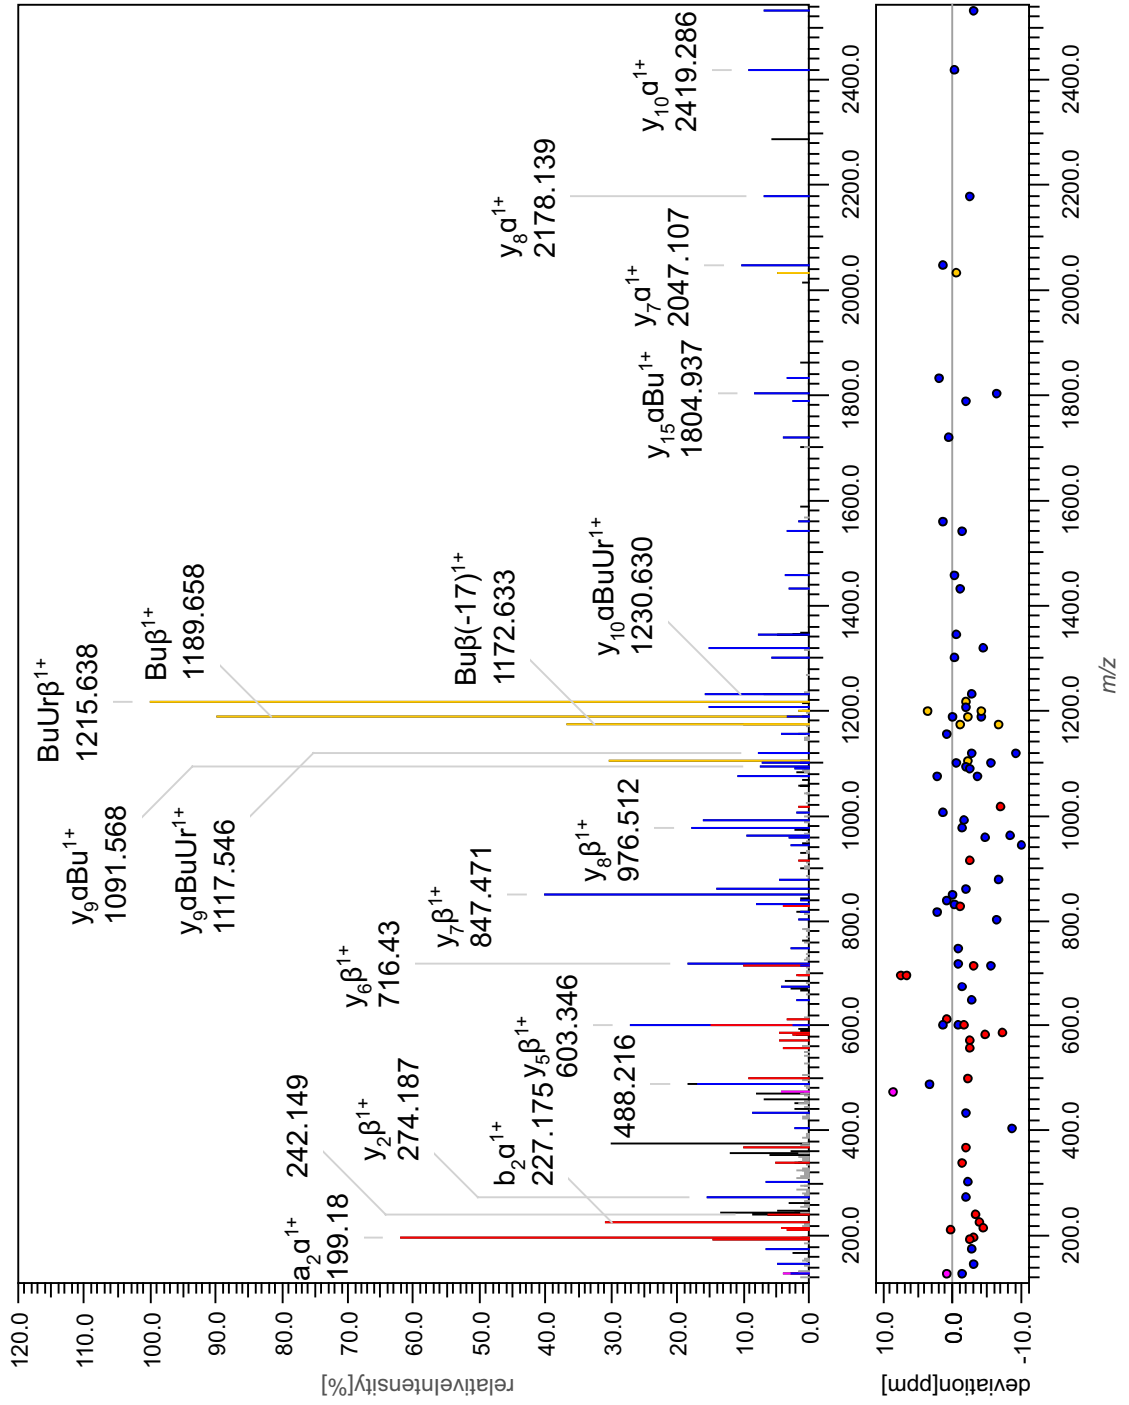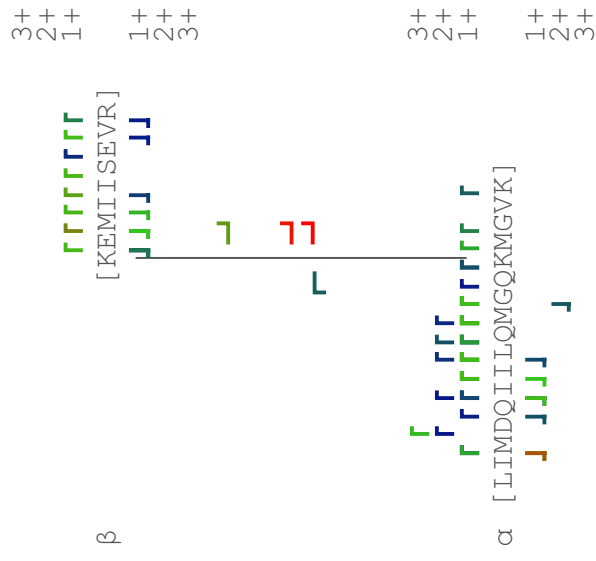

theor.Mass(M+H+):3343.76  
 PrecursorMass(M+H+):3343.754  
 Deviation:-1.74ppm  
 m/z:836.694  
 Charge:+4

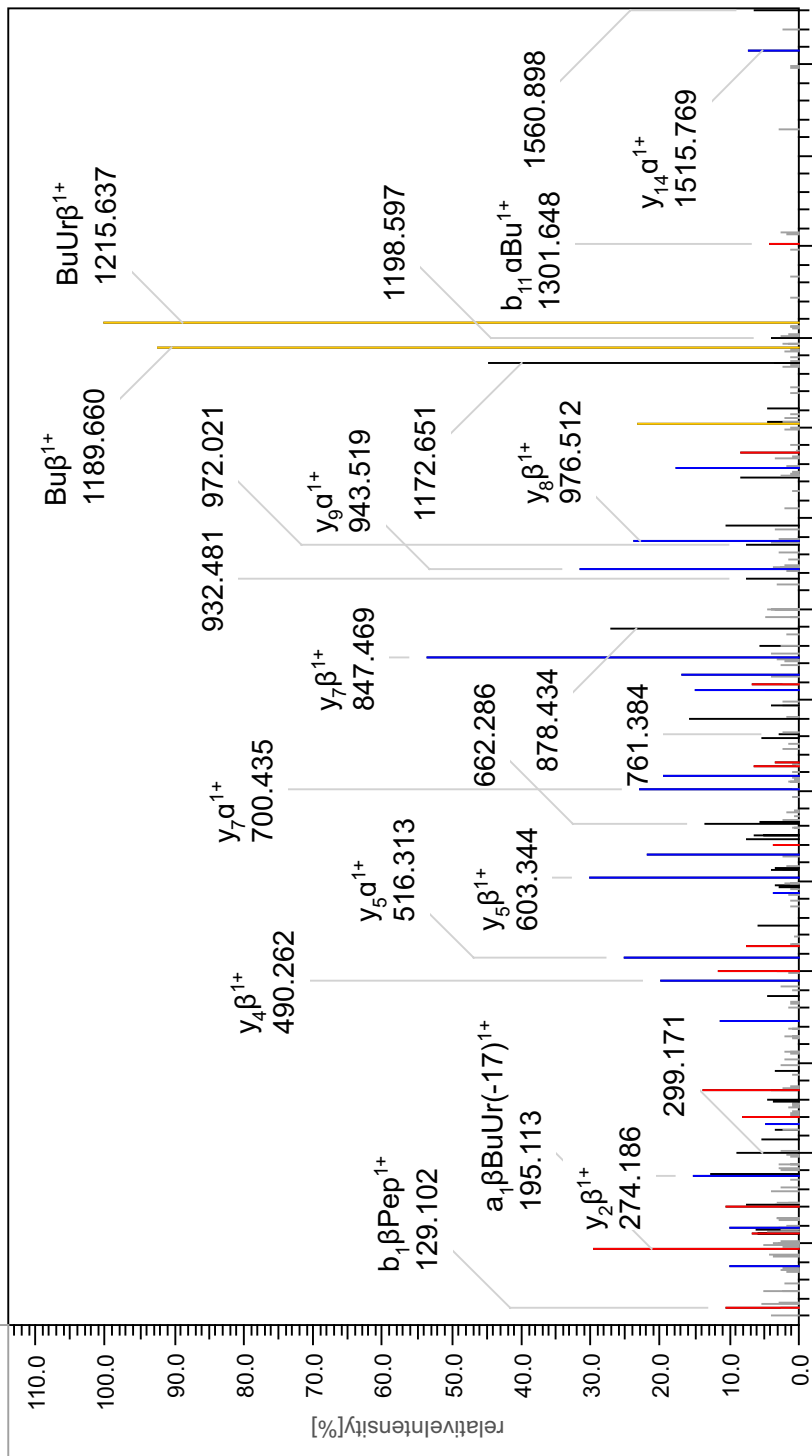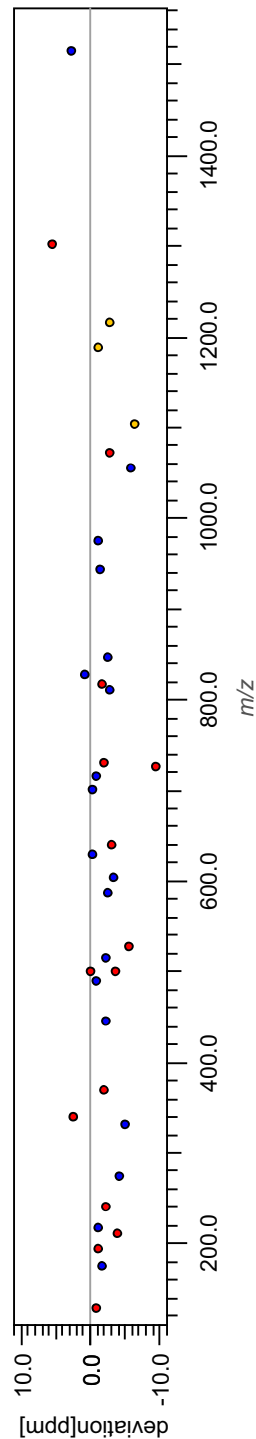

3+  
2+  
1+

β [KEMIISEVR]

1+  
2+  
3+

3+  
2+  
1+

α [MGVKISDEQLDQAIAIAK]

1+  
2+  
3+

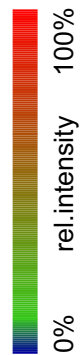

# K134-K394

theor.Mass(M+H+): 2660.367  
 PrecursorMass(M+H+): 2660.364  
 Deviation: -1.13ppm  
 m/z: 665.8465  
 Charge: +4

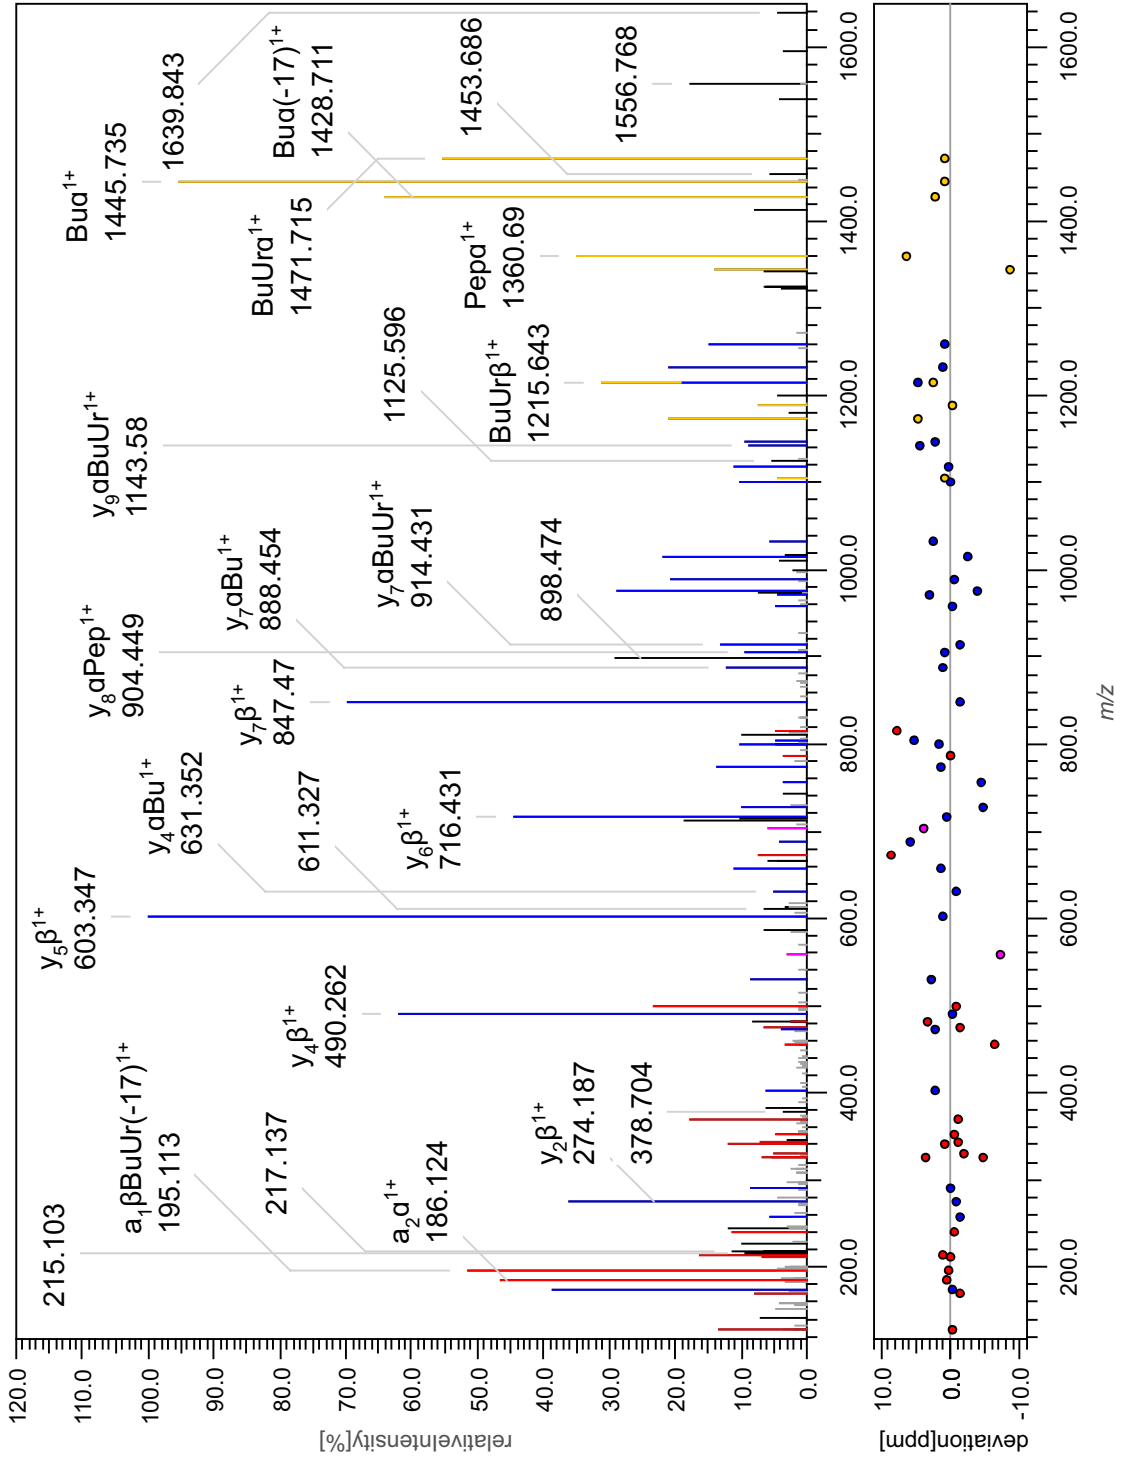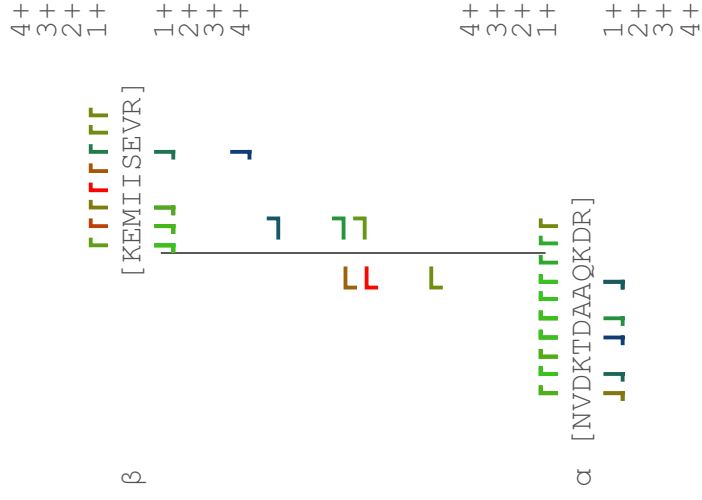

# K134-K405

theor.Mass(M+H+): 3026.471  
 PrecursorMass(M+H+): 3026.463  
 Deviation: -2.57 ppm  
 m/z: 1009.4926  
 Charge: +3

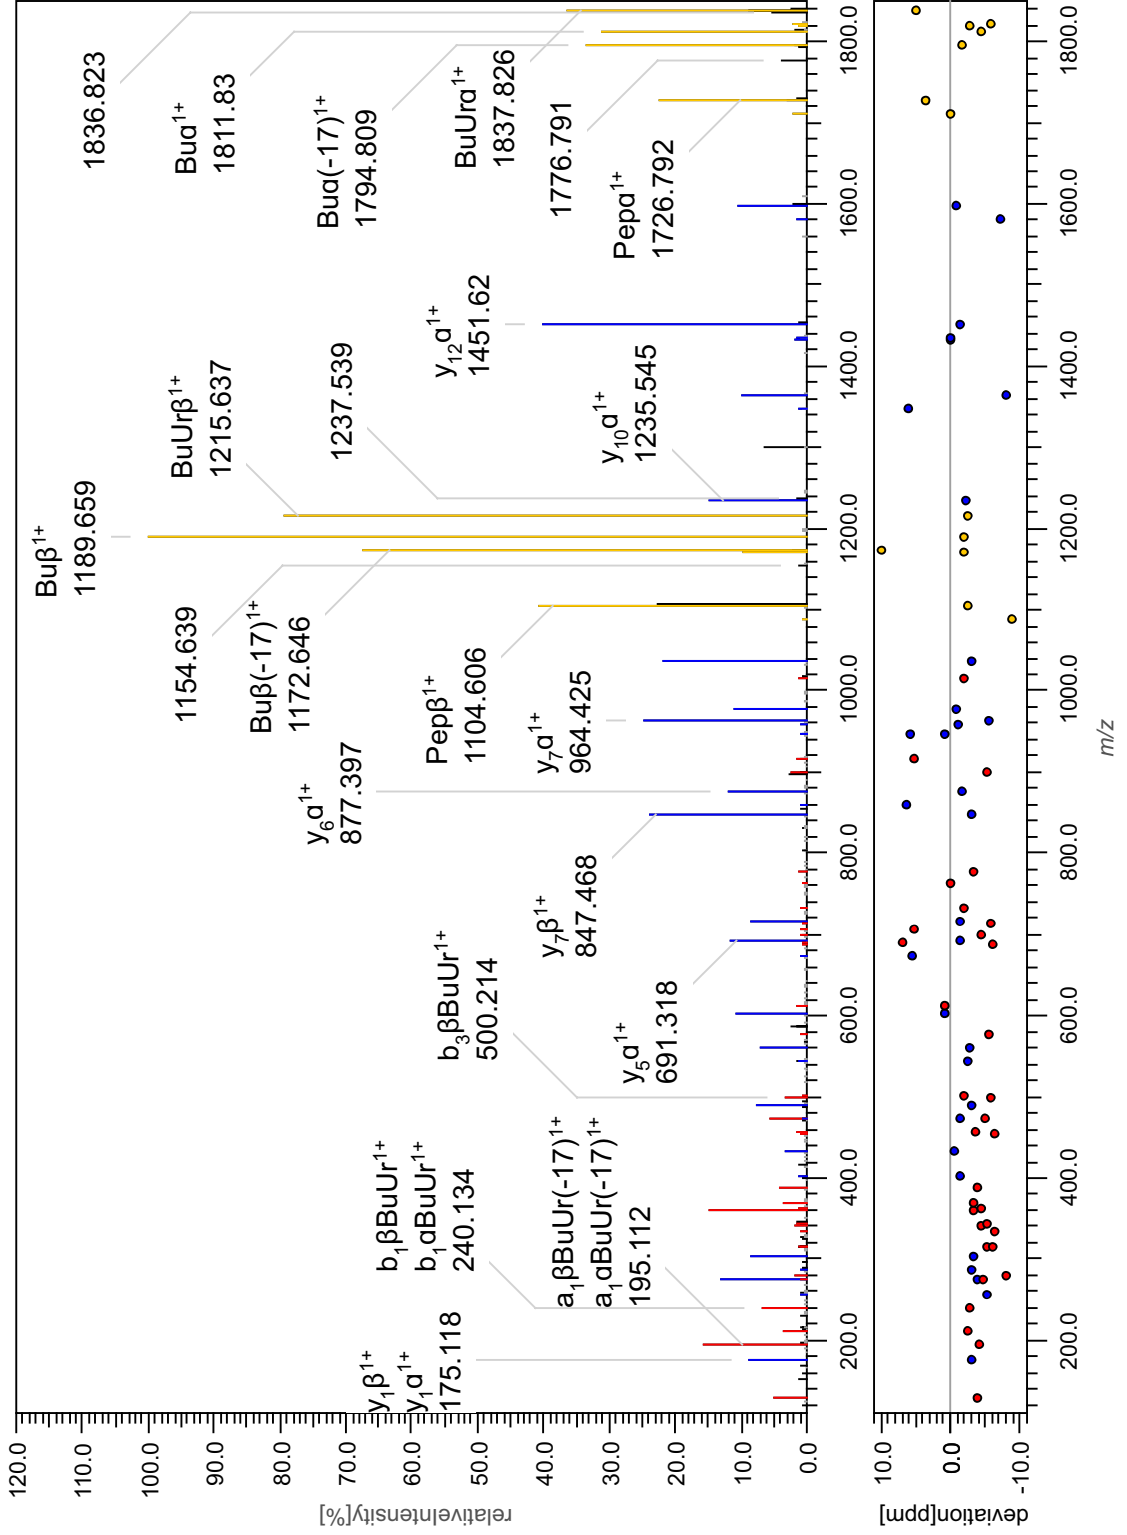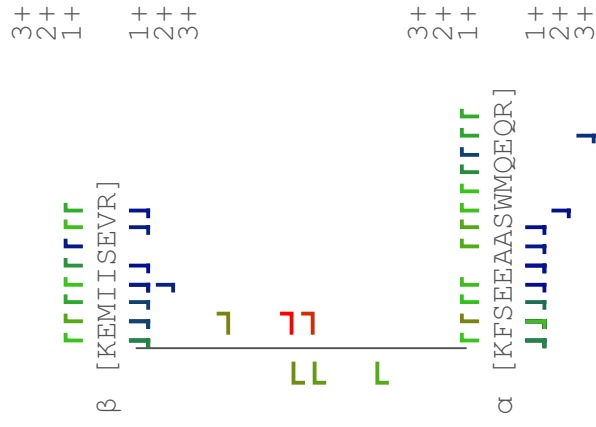

theor.Mass(M+H+):2704.526  
 PrecursorMass(M+H+):2704.53  
 Deviation1.55ppm  
 m/z:541.7118  
 Charge:+5

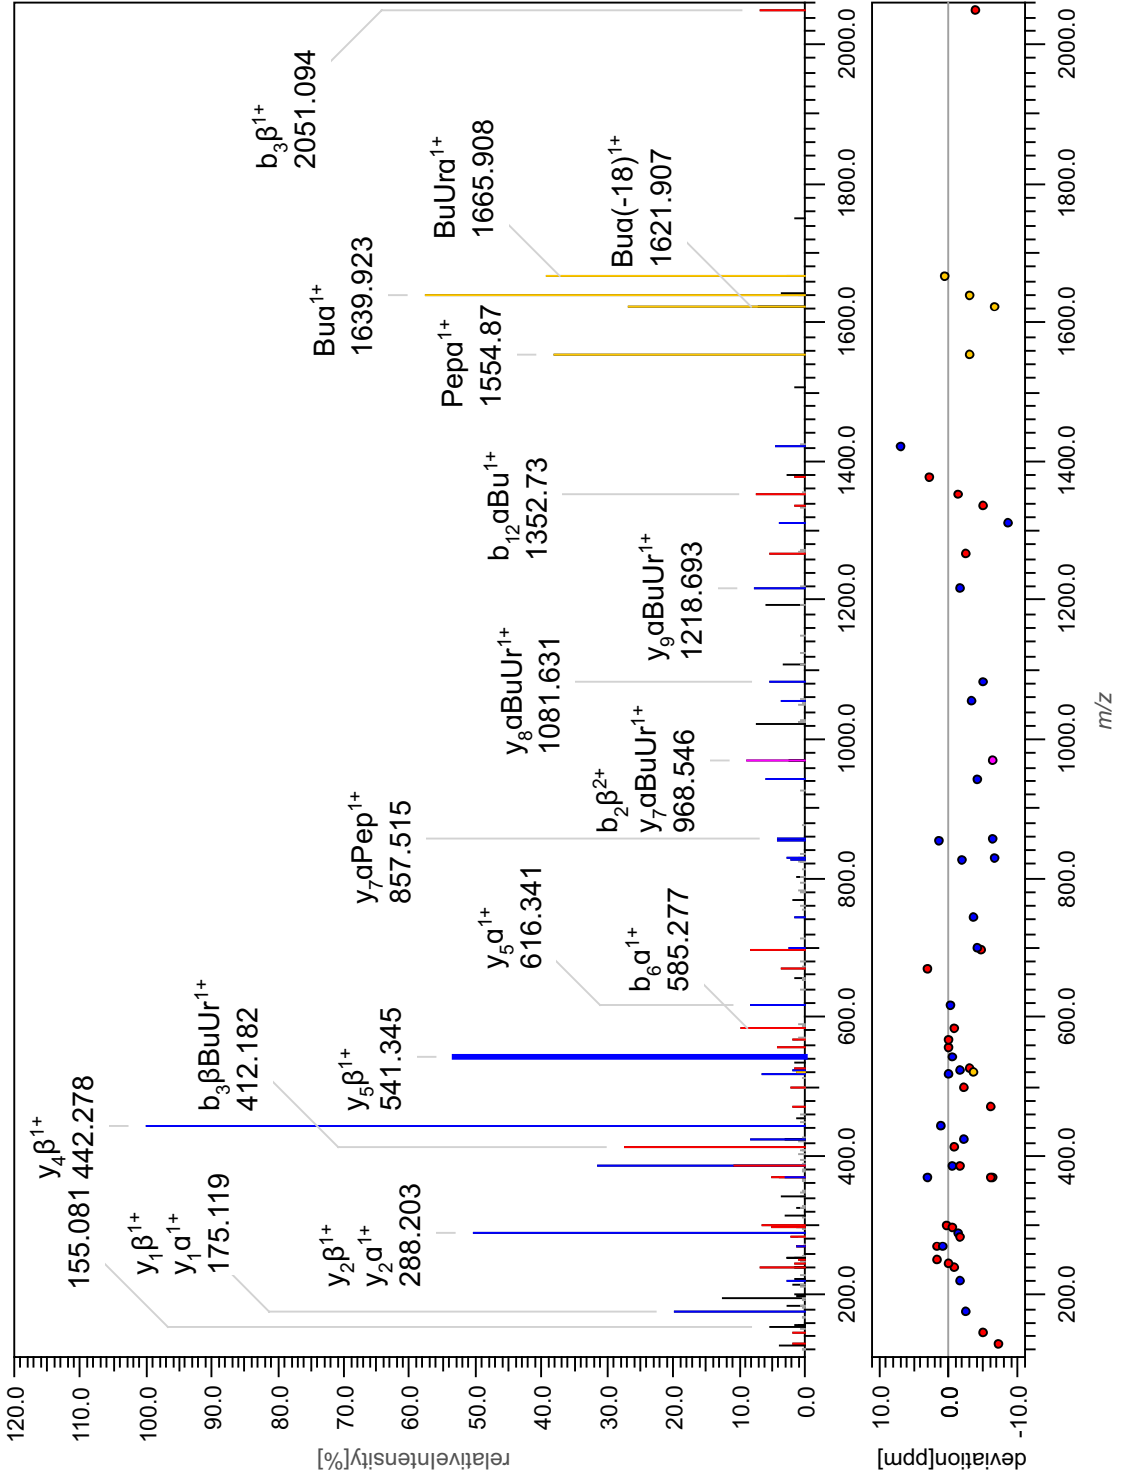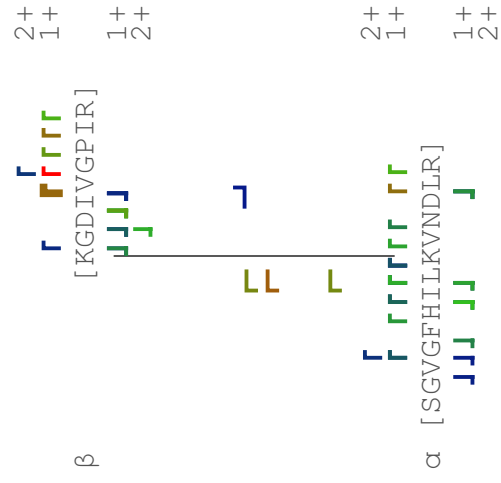

theor.Mass(M+H+):3570.87  
 PrecursorMass(M+H+):3570.859  
 Deviation-3.02ppm  
 m/z:714.9776  
 Charge:+5

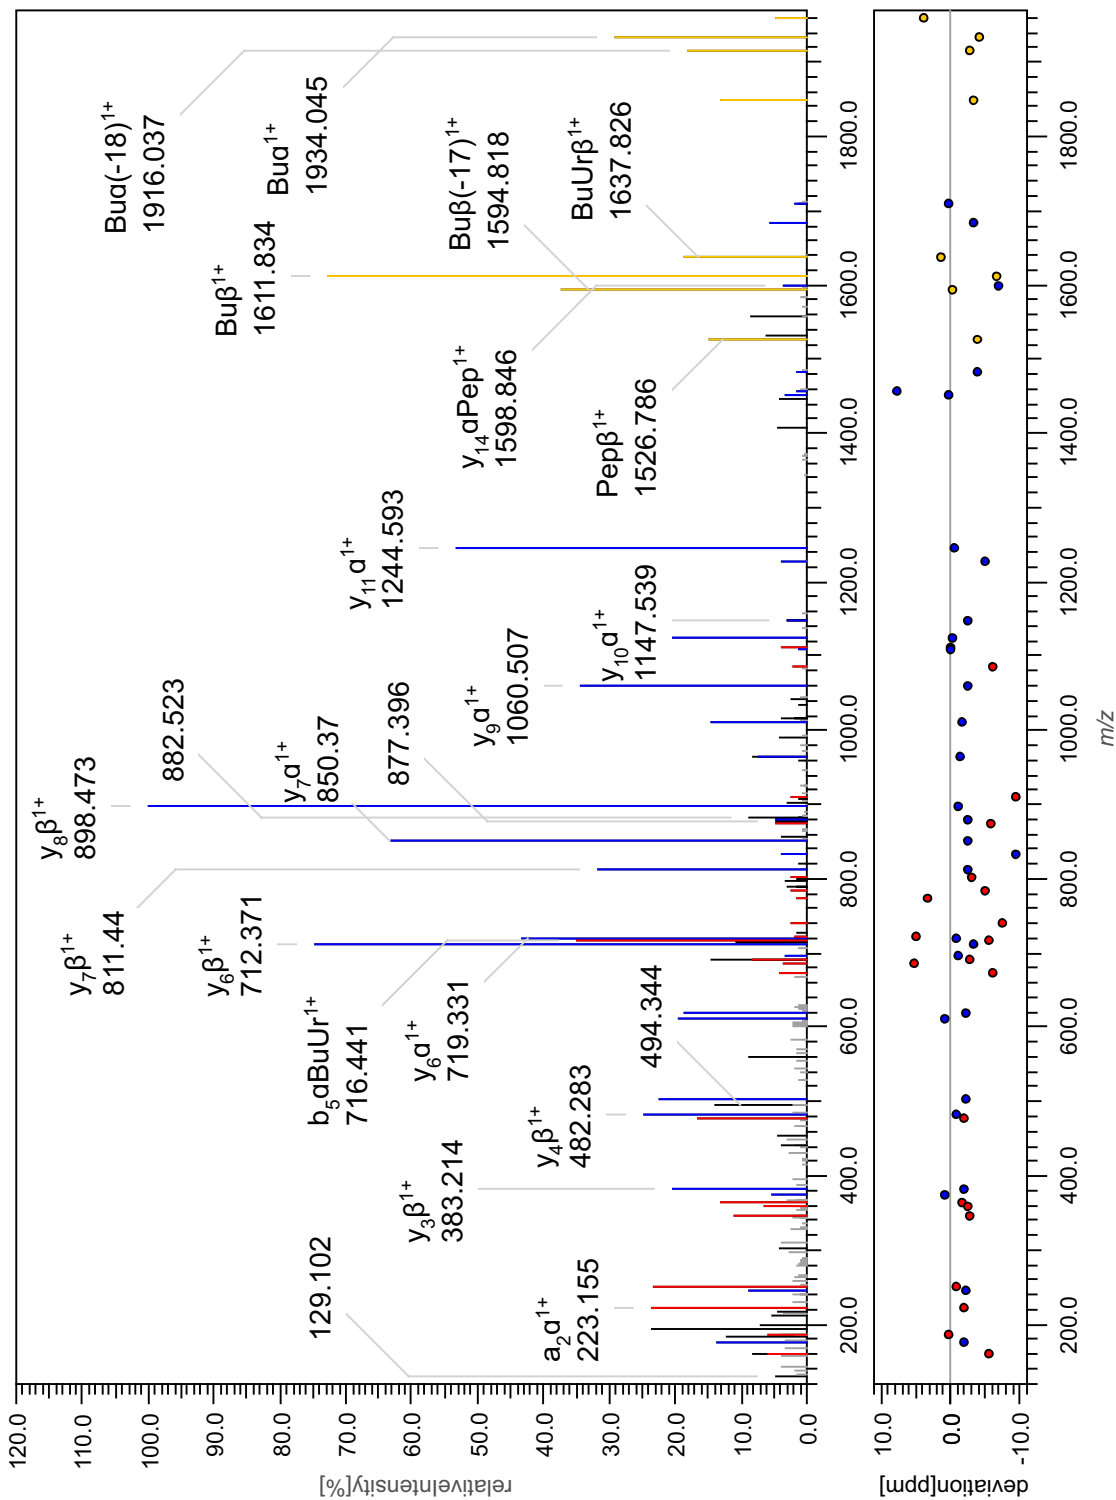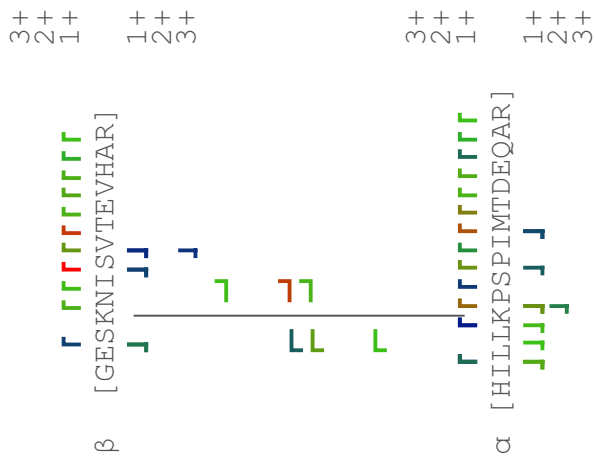

theor.Mass(M+H+):4574.321  
 PrecursorMass(M+H+):4574.315  
 Deviation:-1.35ppm  
 m/z:915.66876  
 Charge:+5

K278-K362

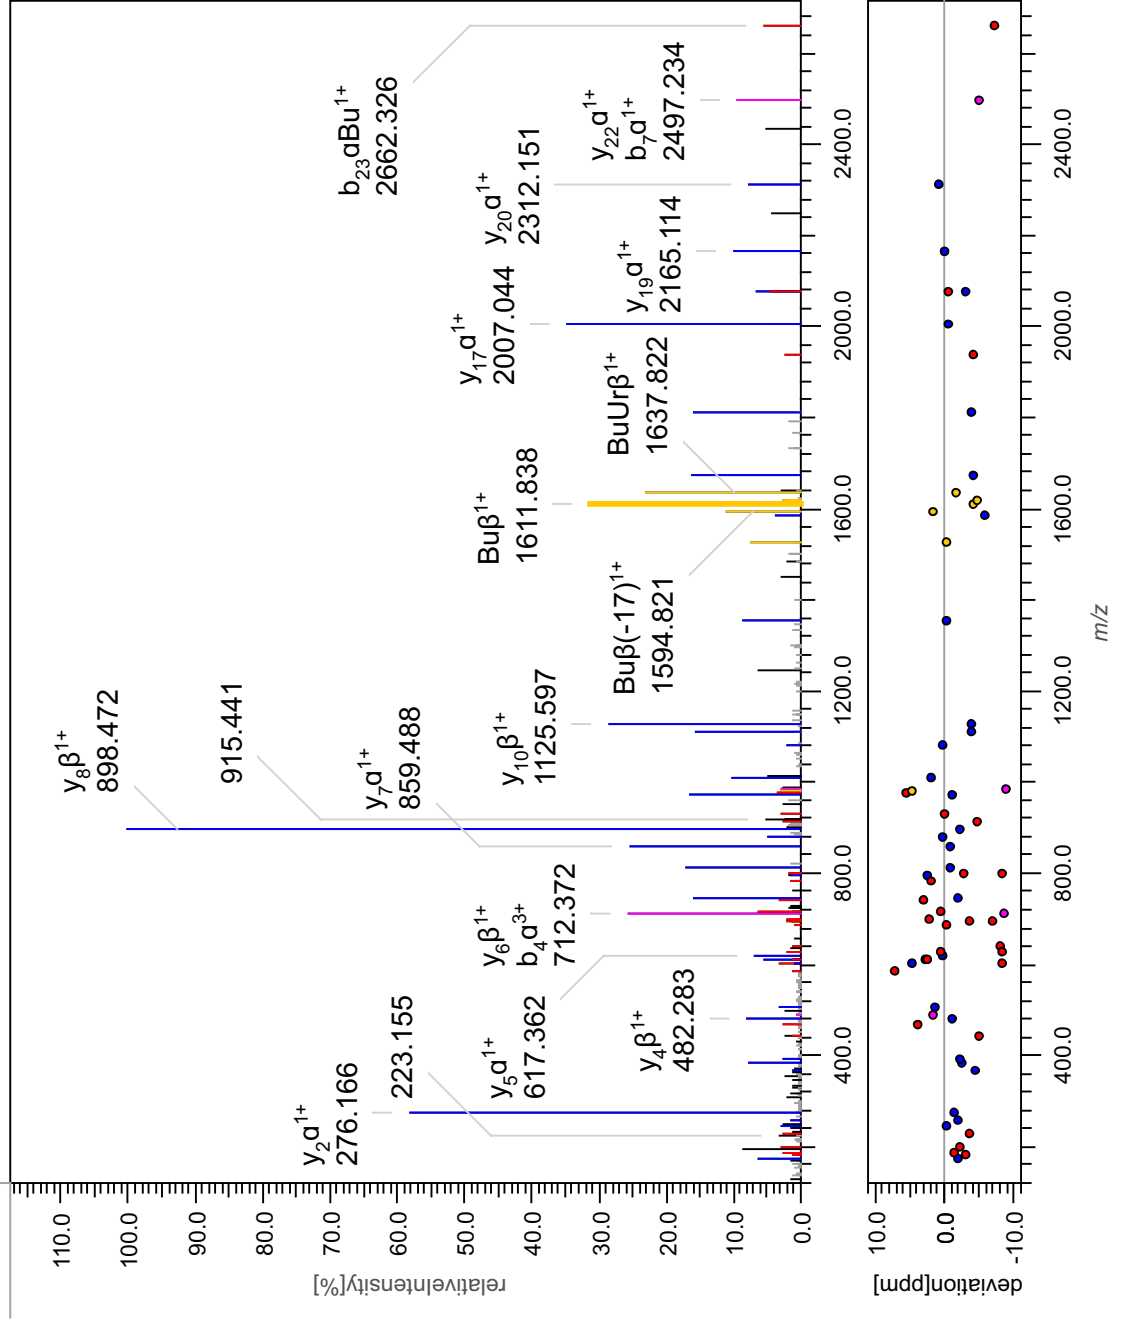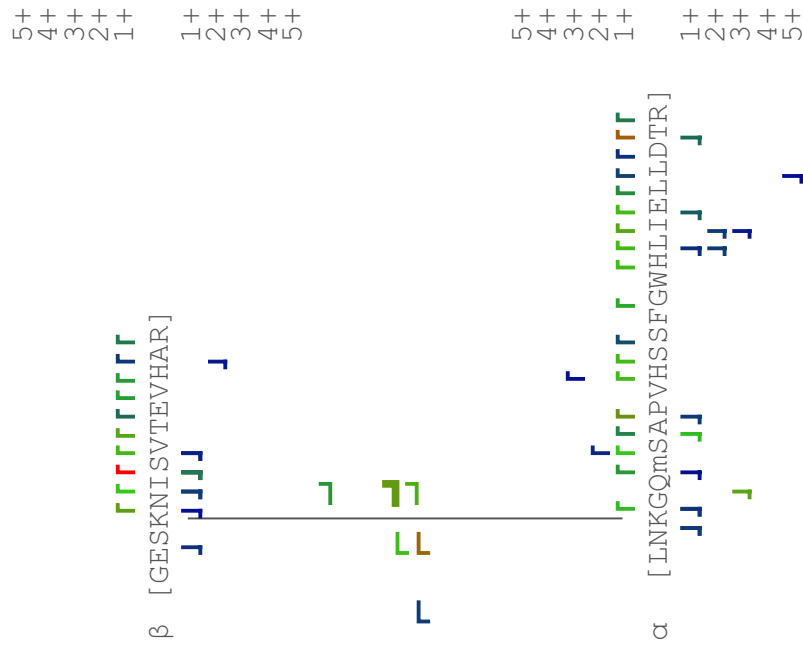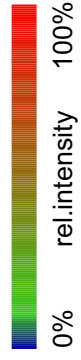



theor.Mass(M+H+):2811.423  
 PrecursorMass(M+H+):2811.413  
 Deviation:-3.48ppm  
 m/z:937.8093  
 Charge:+3

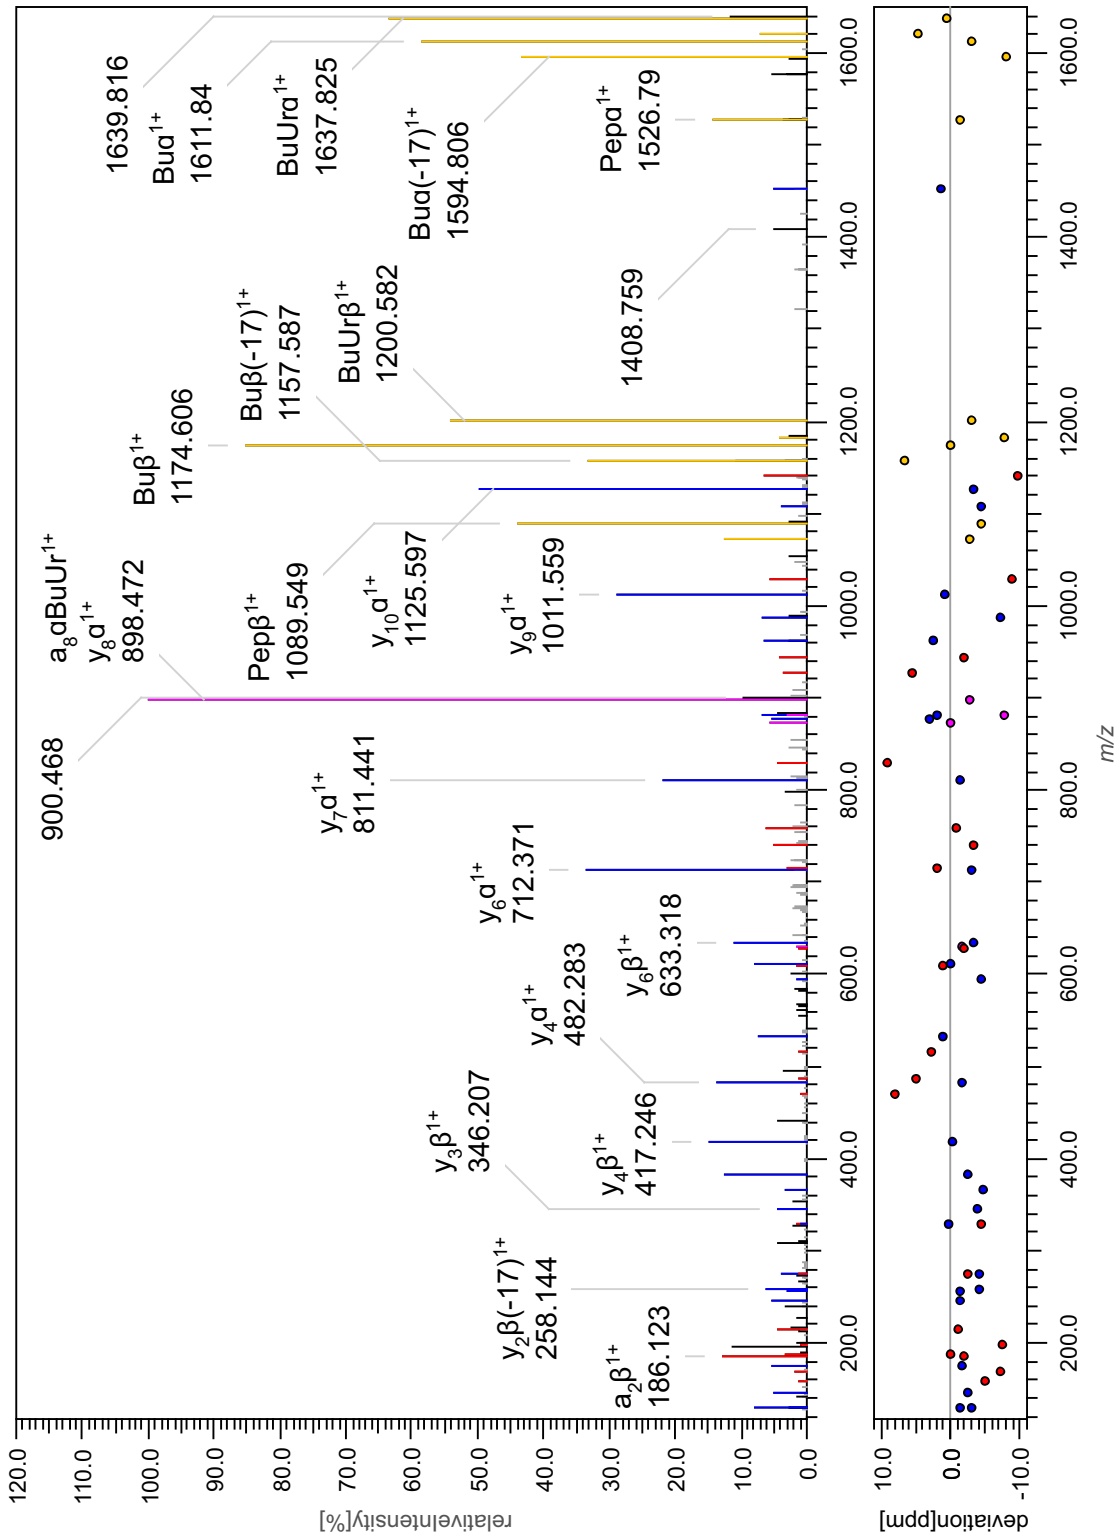

theor.Mass(M+H+):3271.808  
PrecursorMass(M+H+):3271.804  
Deviation:-1.2ppm  
m/z:818.70654  
Charge:+4

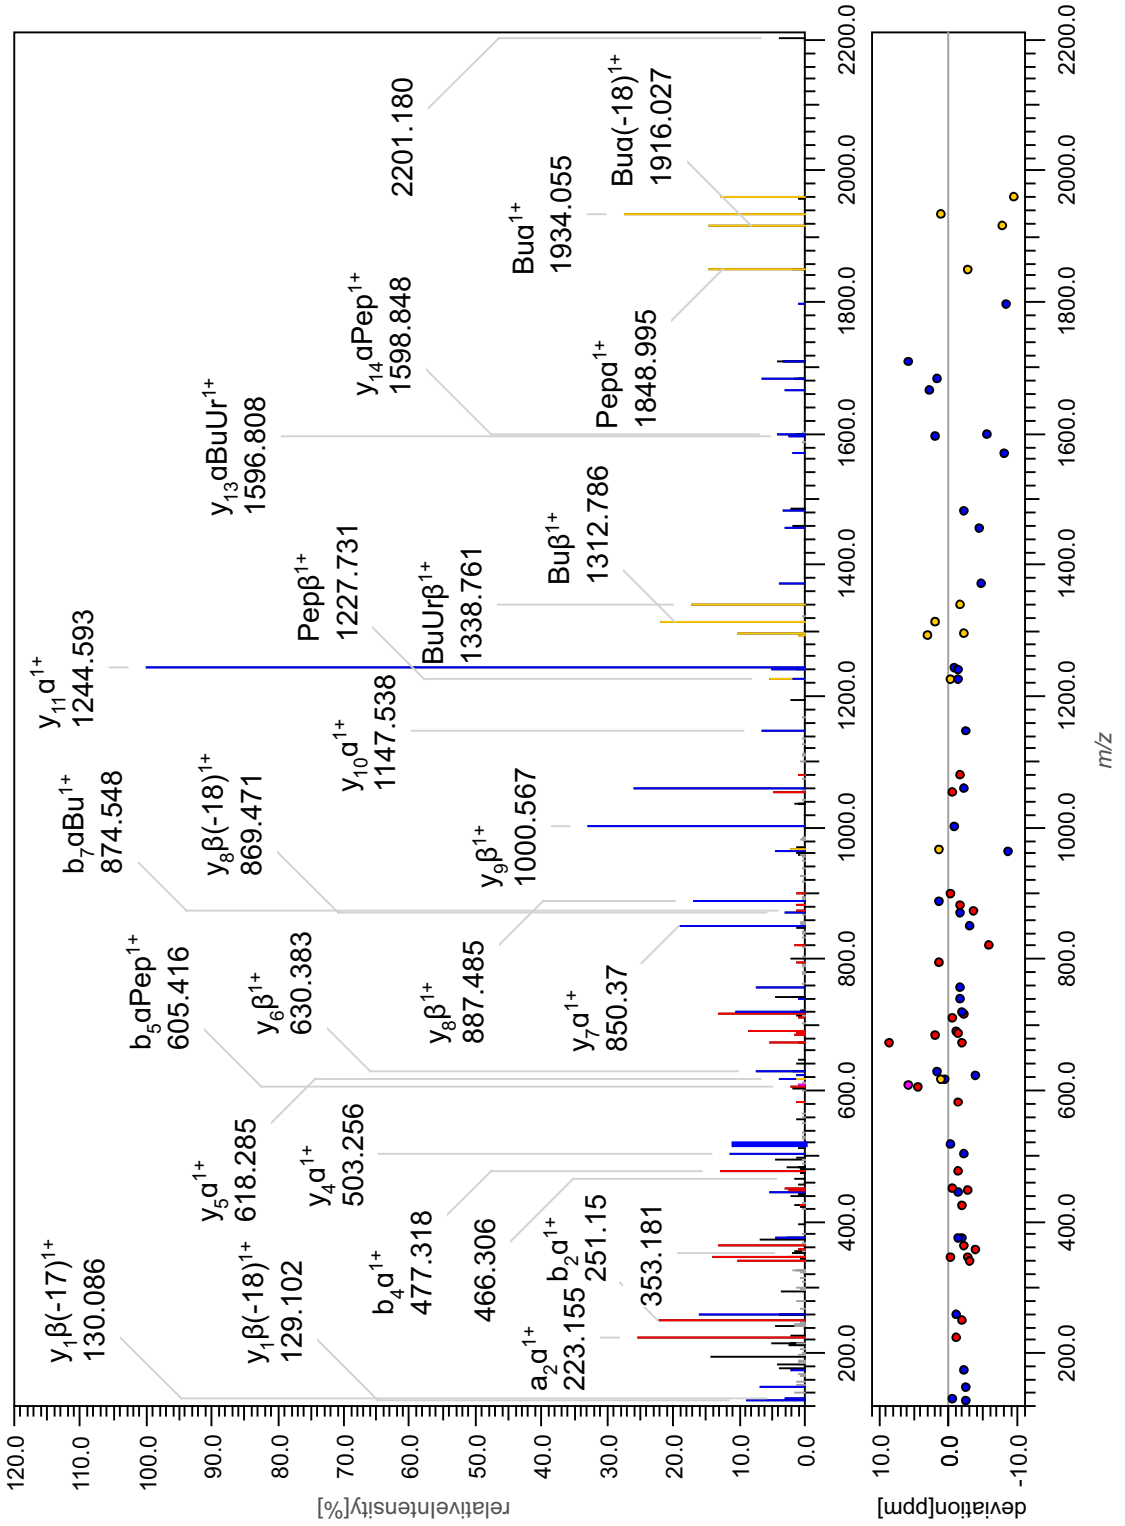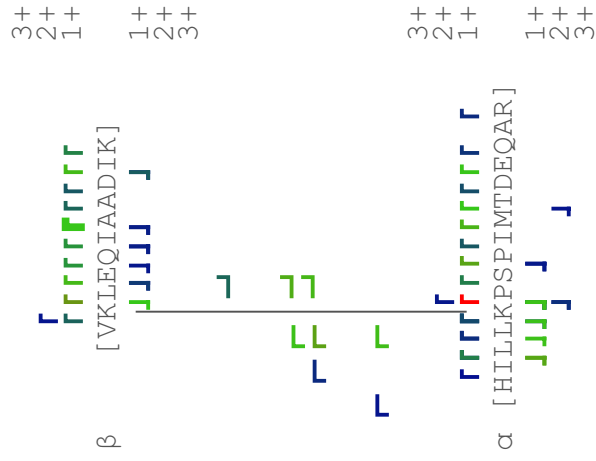

theor.Mass(M+H+):2475.382  
 PrecursorMass(M+H+):2475.378  
 Deviation:-1.69ppm  
 m/z:825.79736  
 Charge:+3

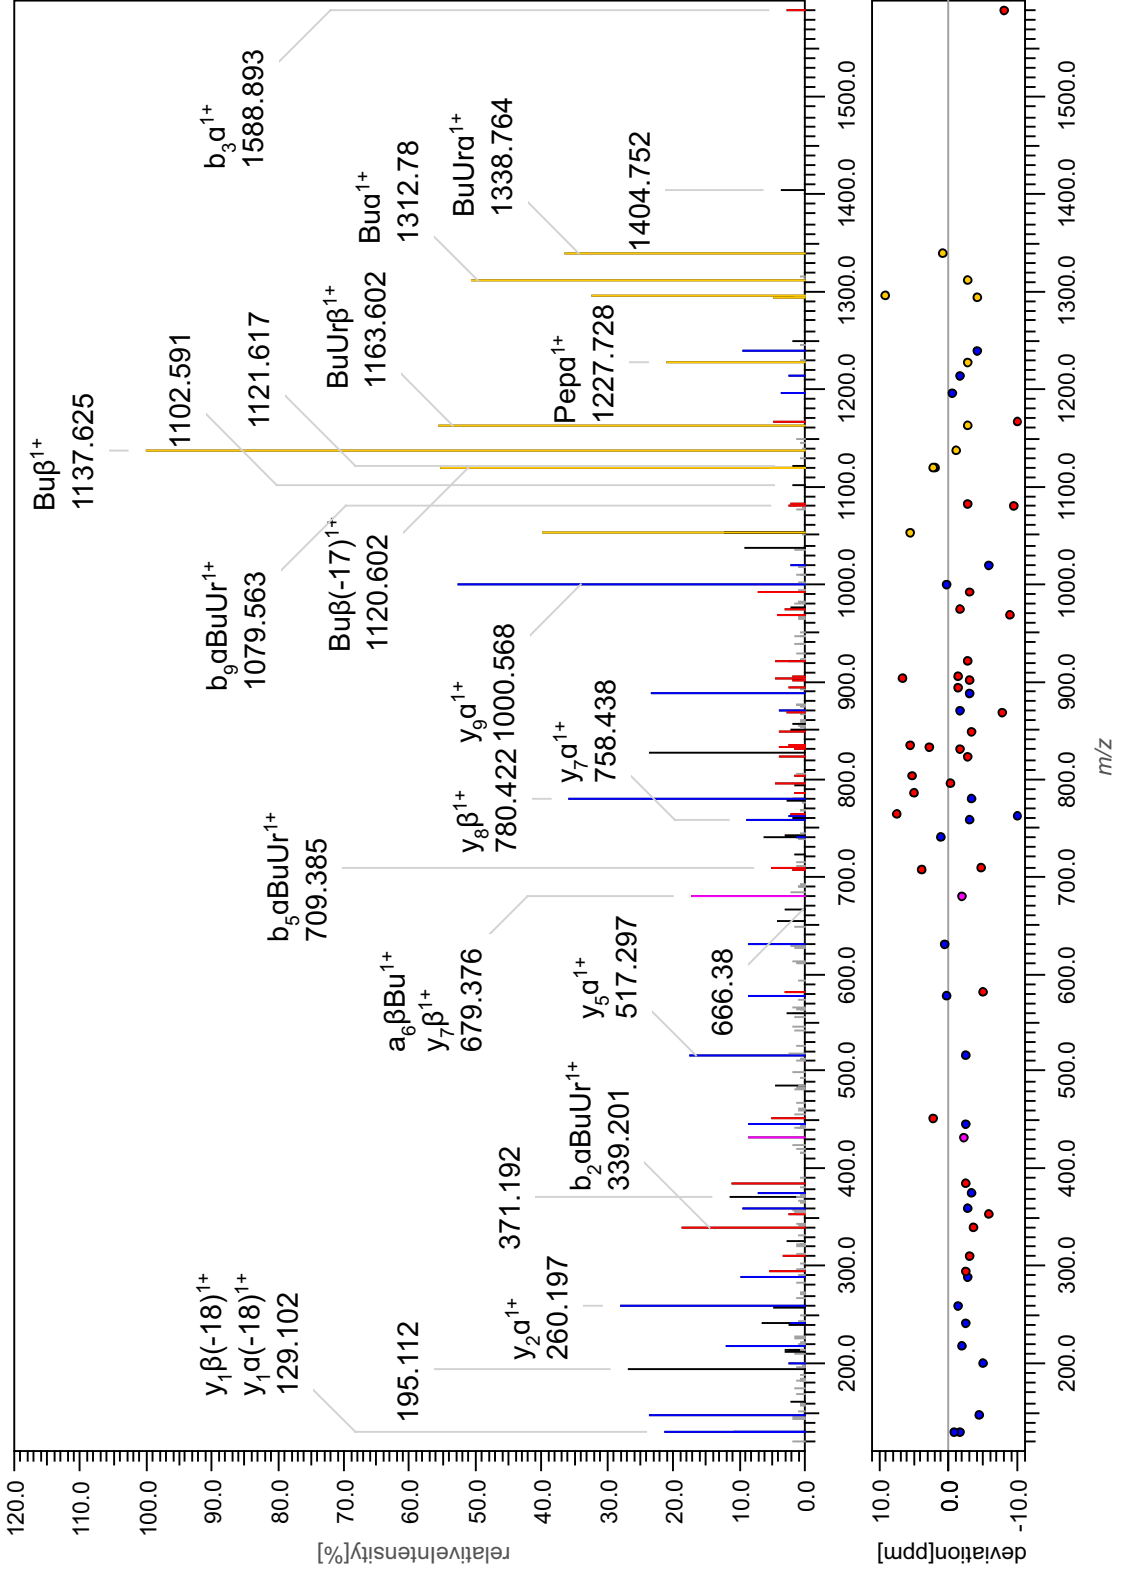

theor.Mass(M+H+):4304.25  
 PrecursorMass(M+H+):4304.238  
 Deviation:-2.6ppm  
 m/z:861.6535  
 Charge:+5

K3)

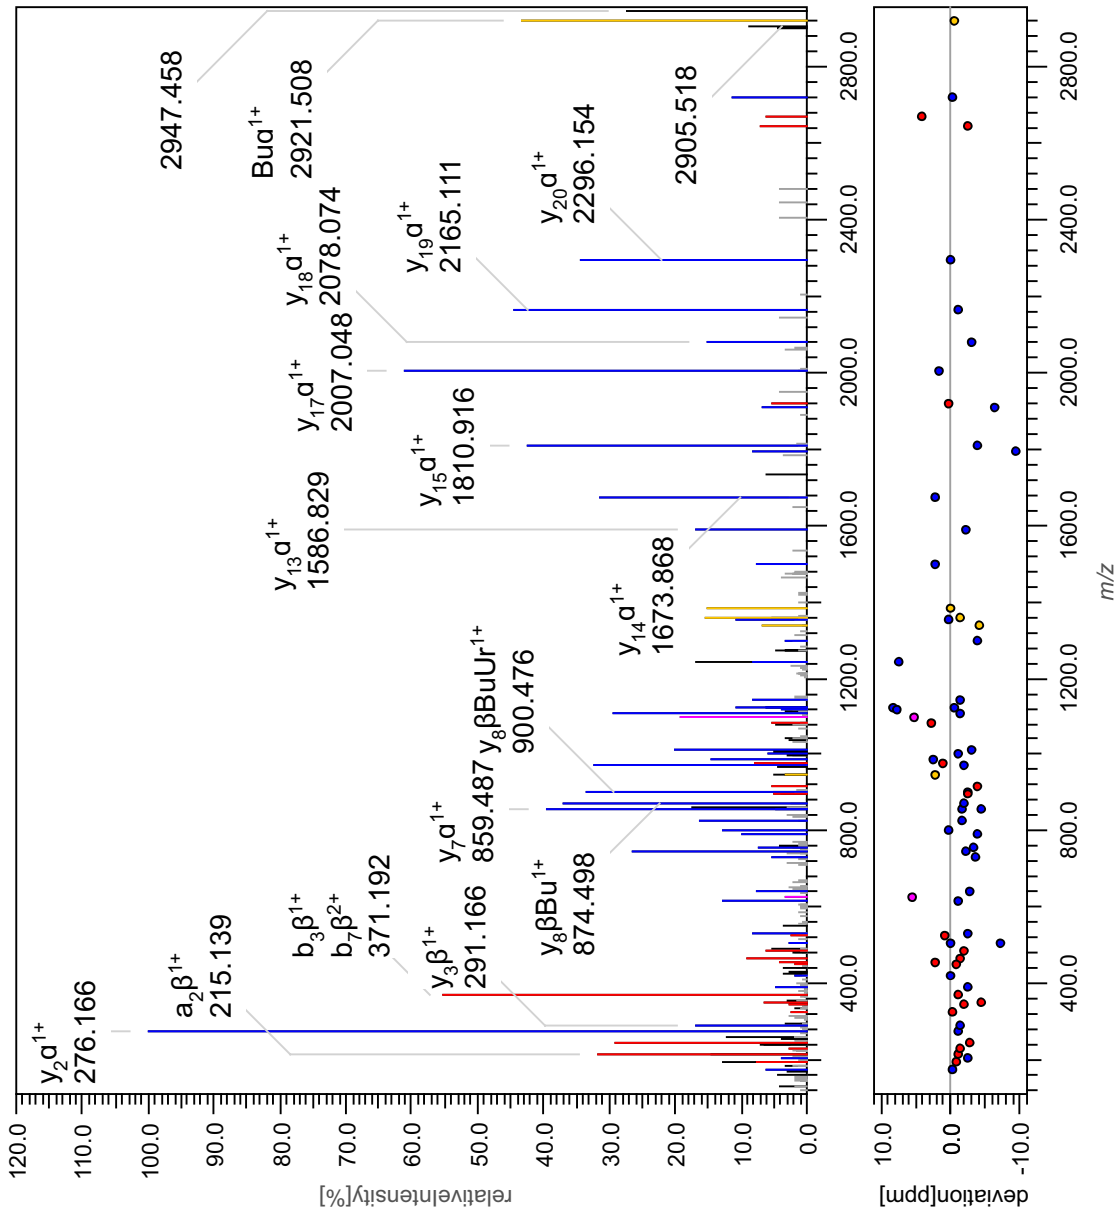

K315-K362

3+  
2+  
1+

1+  
2+  
3+

3+  
2+  
1+

1+  
2+  
3+

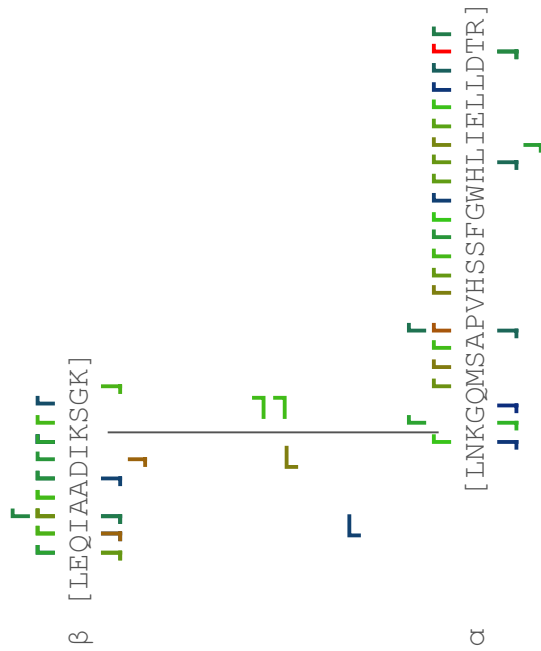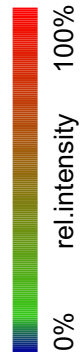

theor.Mass(M+H+): 4121.087  
 PrecursorMass(M+H+): 4121.075  
 Deviation: -2.89ppm  
 m/z: 825.0209  
 Charge: +5

K3

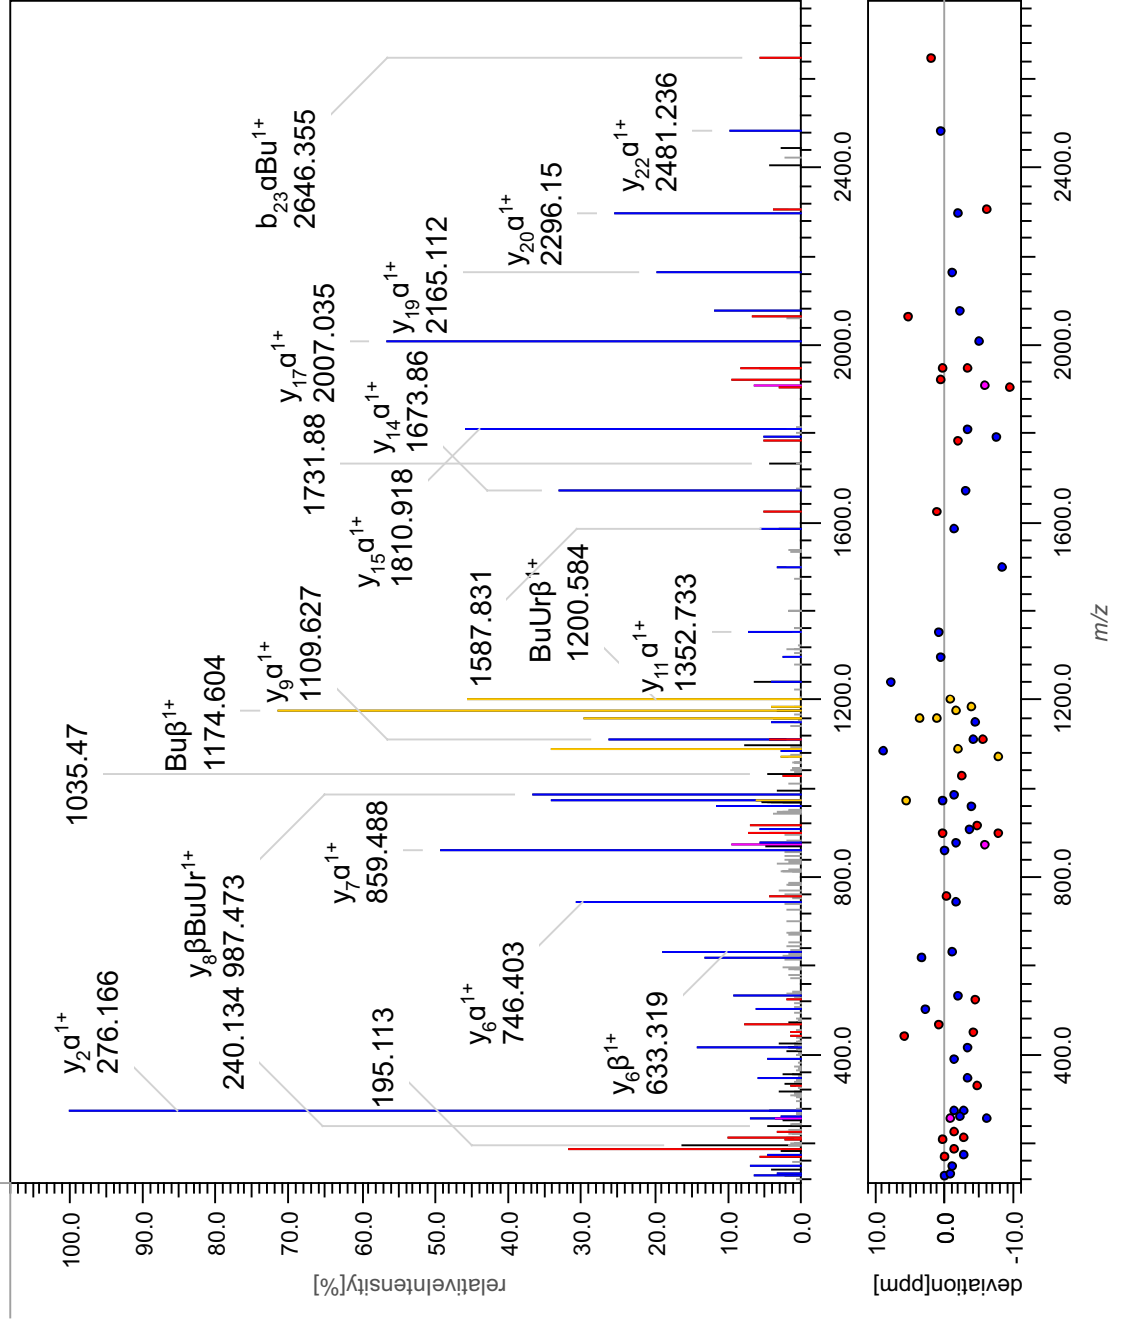

K362-K388

3+  
2+  
1+

1+  
2+  
3+

3+  
2+  
1+

1+  
2+  
3+

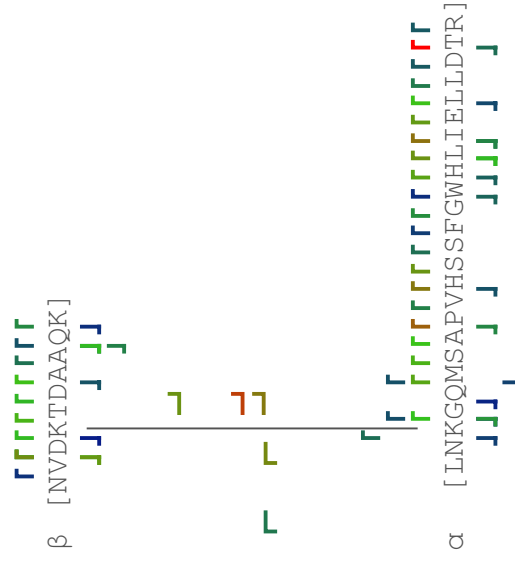

theor.Mass(M+H+):2826.311  
 PrecursorMass(M+H+):2826.306  
 Deviation:-1.94ppm  
 m/z:942.7734  
 Charge:+3

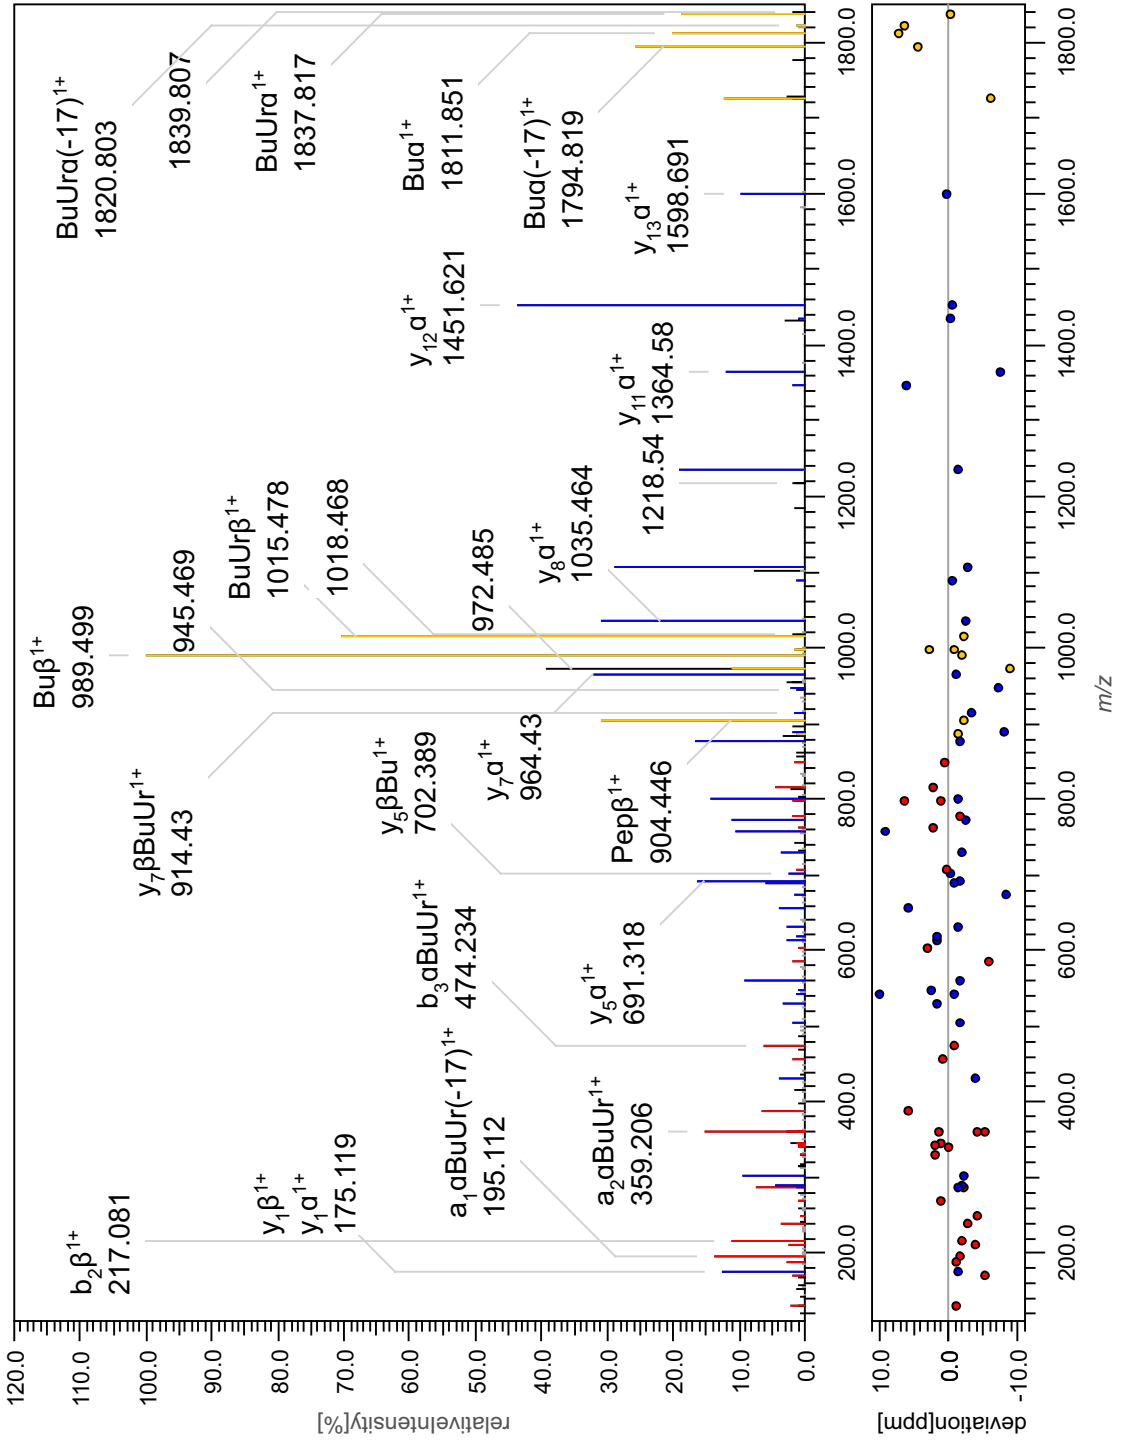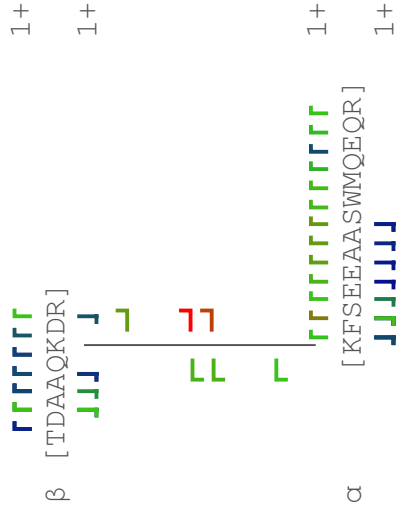

XL-MS spectra of inter-domain crosslinks detected in DSBU crosslinked SurA.

# K105-K278

theor.Mass(M+H+): 4582.262  
 PrecursorMass(M+H+): 4582.251  
 Deviation: -2.41 ppm  
 m/z: 917.2561  
 Charge: +5

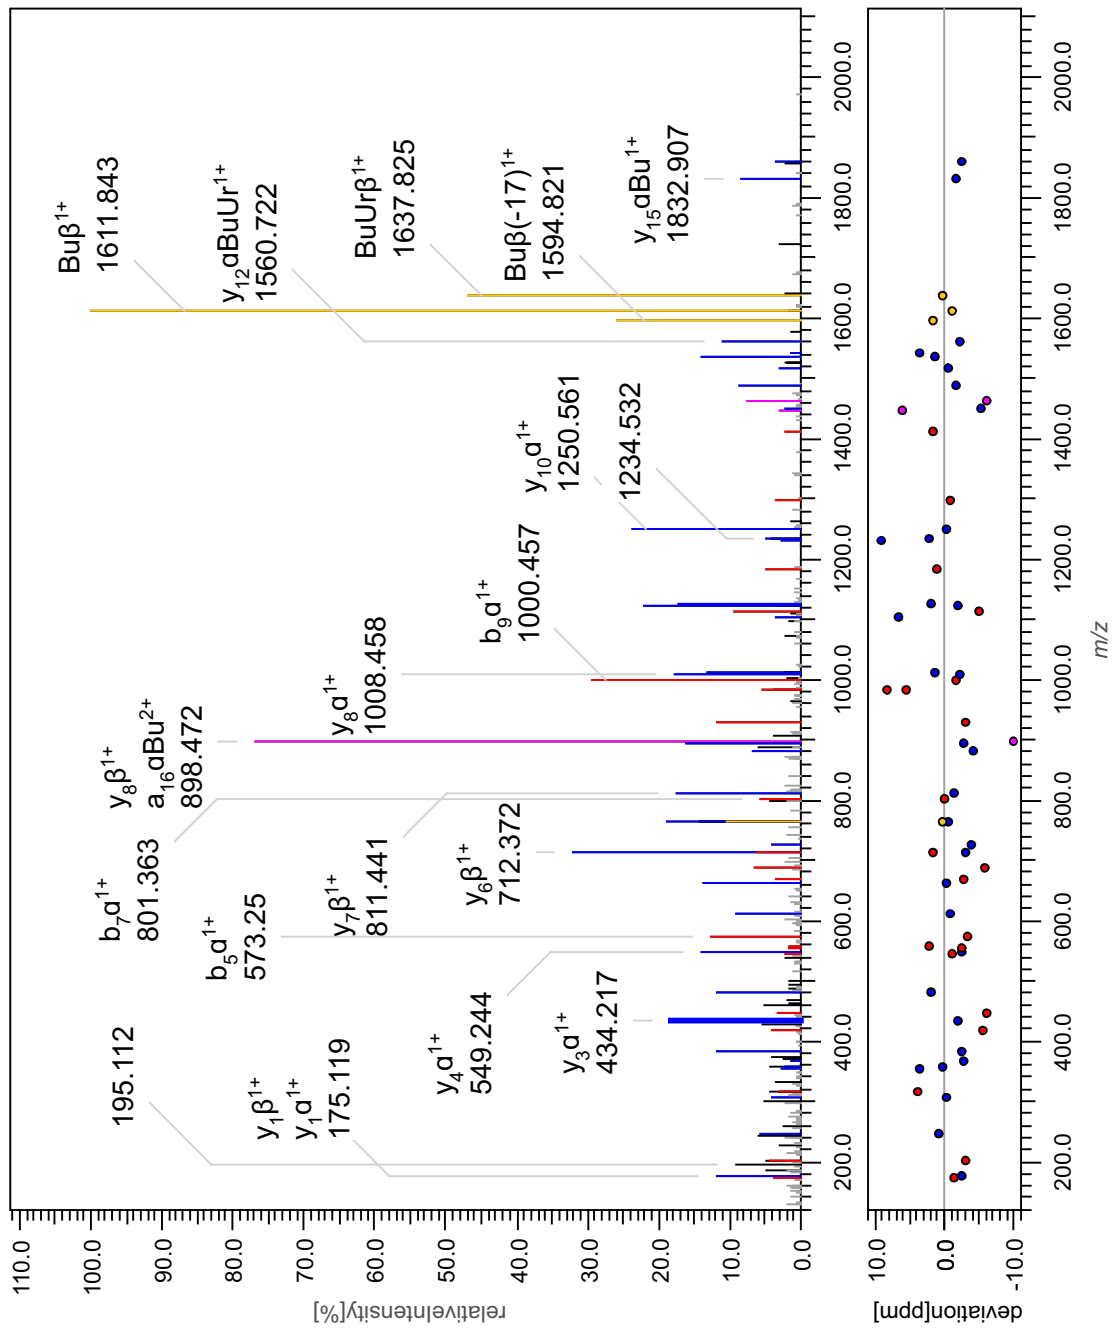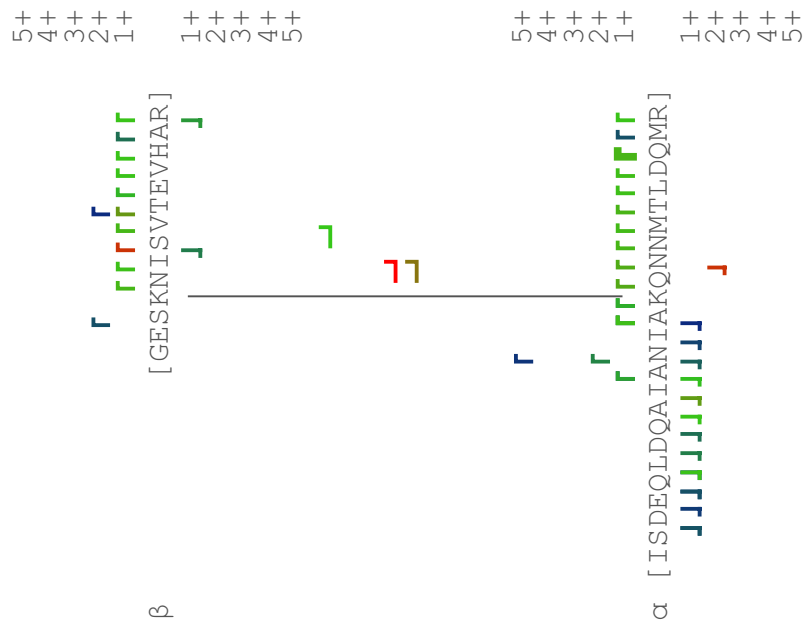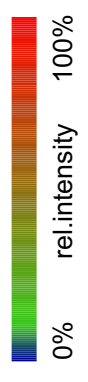



# K105-K293

theor.Mass(M+H+): 4904.47  
 PrecursorMass(M+H+): 4904.456  
 Deviation: -2.84 ppm  
 m/z: 981.6971  
 Charge: +5

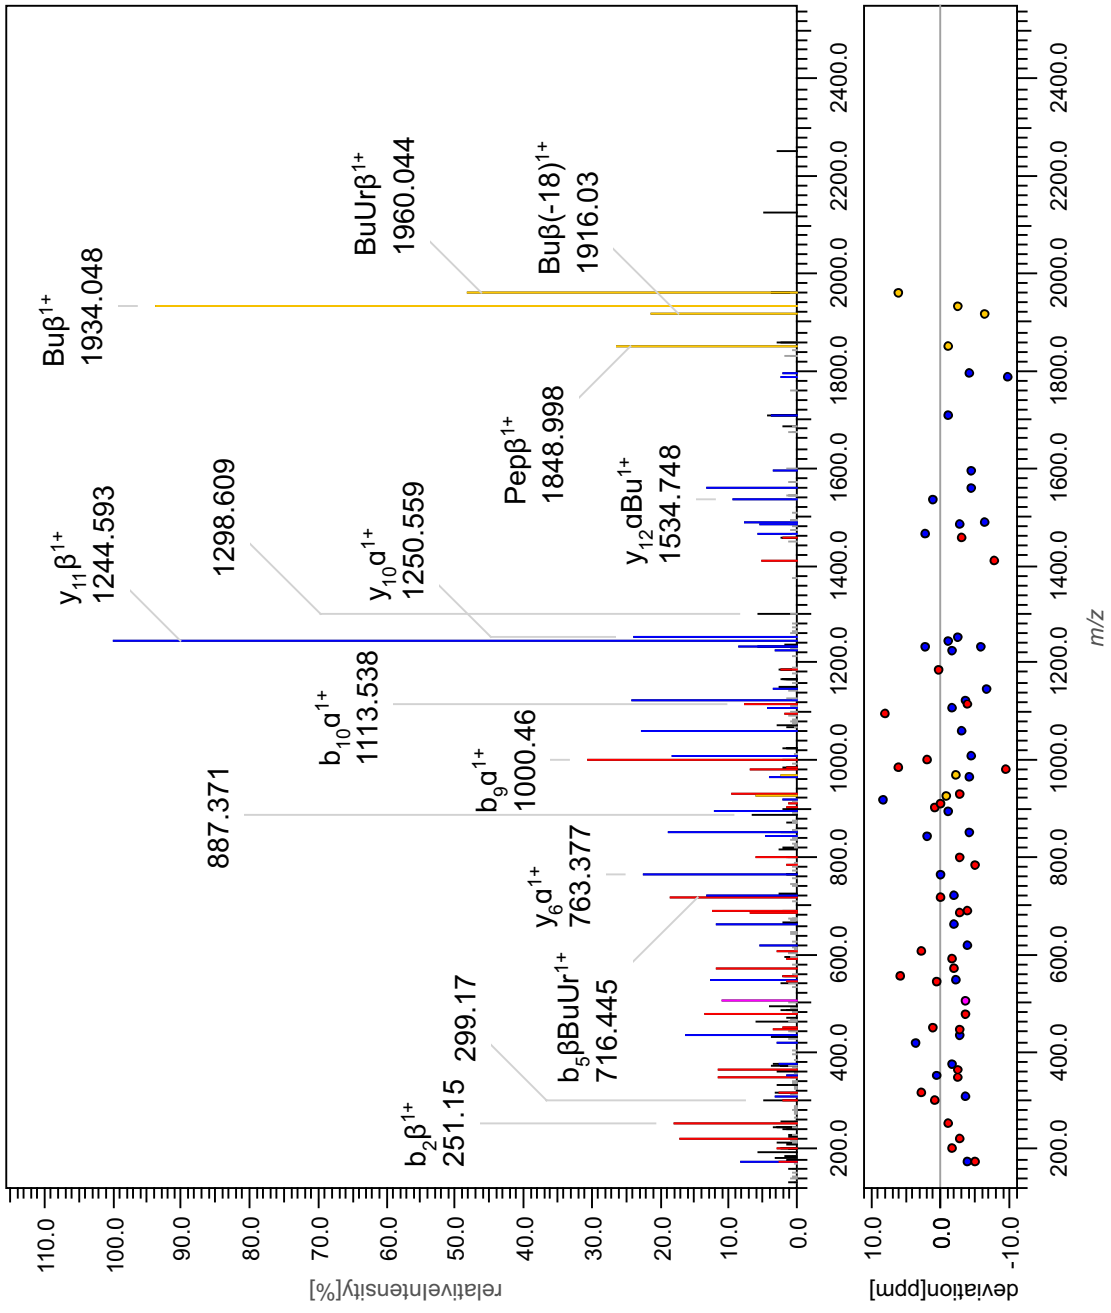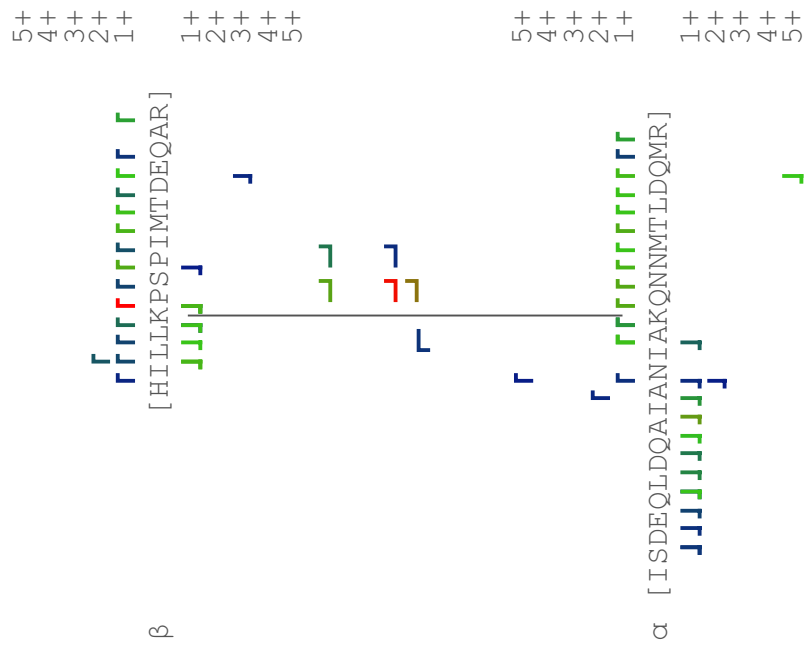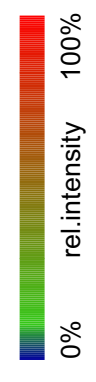

# K134-K278

theor.Mass(M+H+): 2826.478  
 PrecursorMass(M+H+): 2826.473  
 Deviation: -1.85ppm  
 m/z: 566.10034  
 Charge: +5

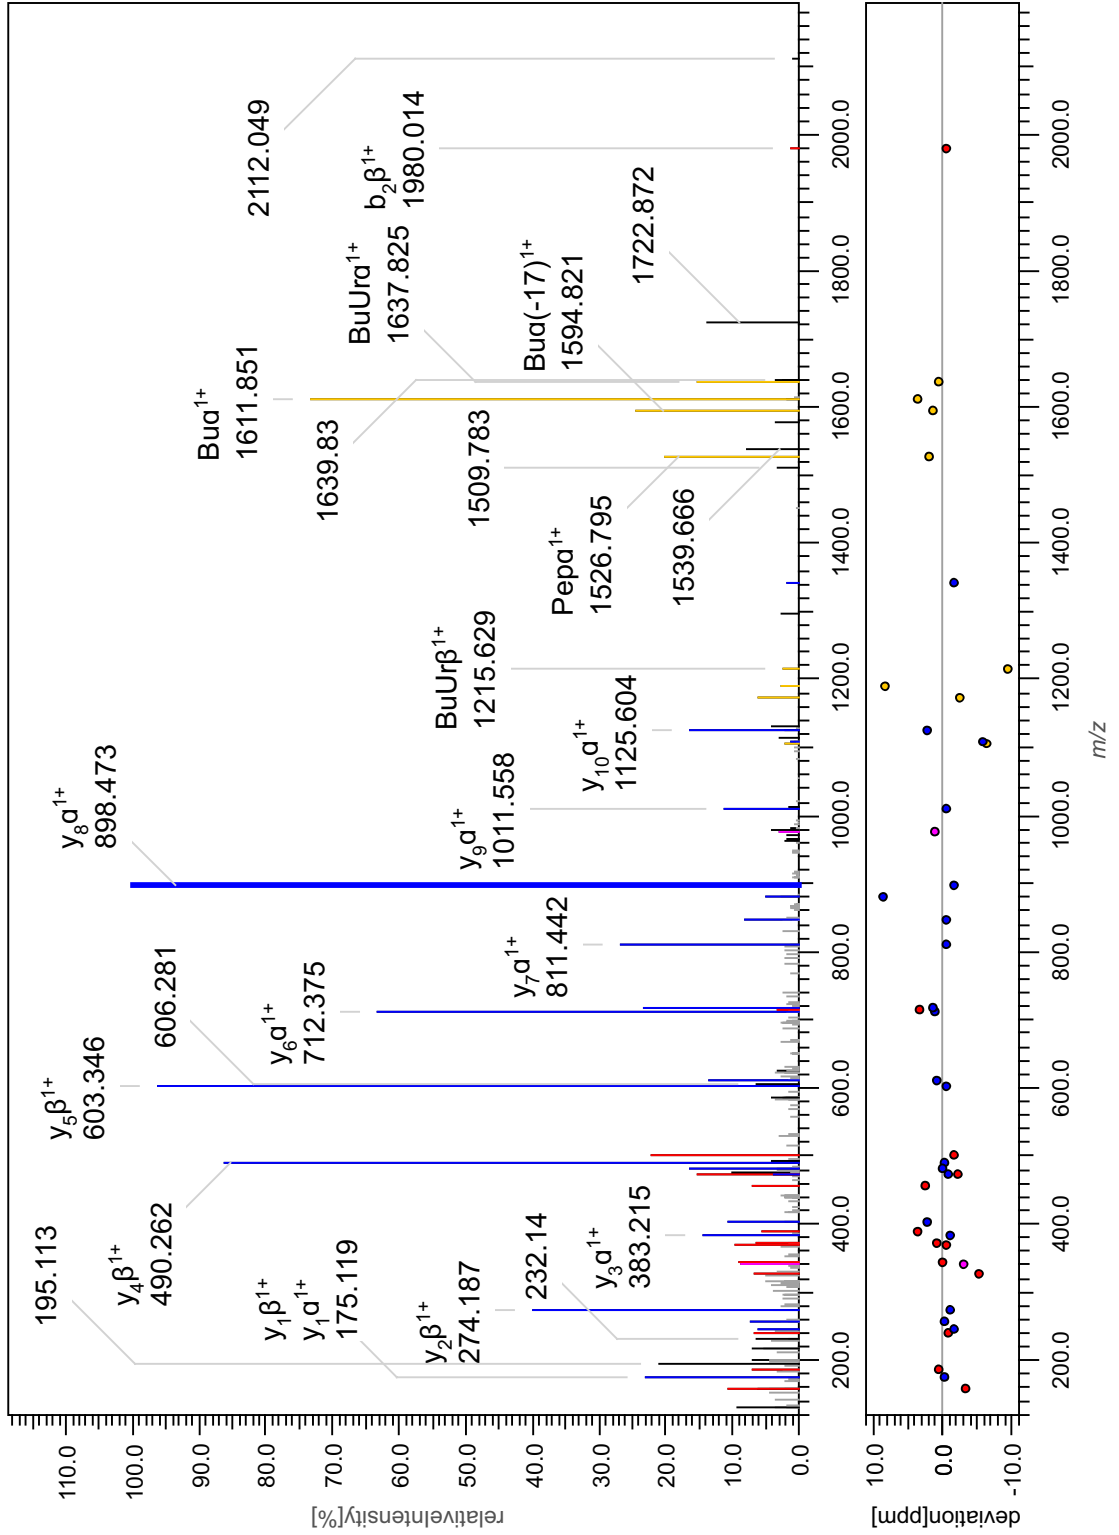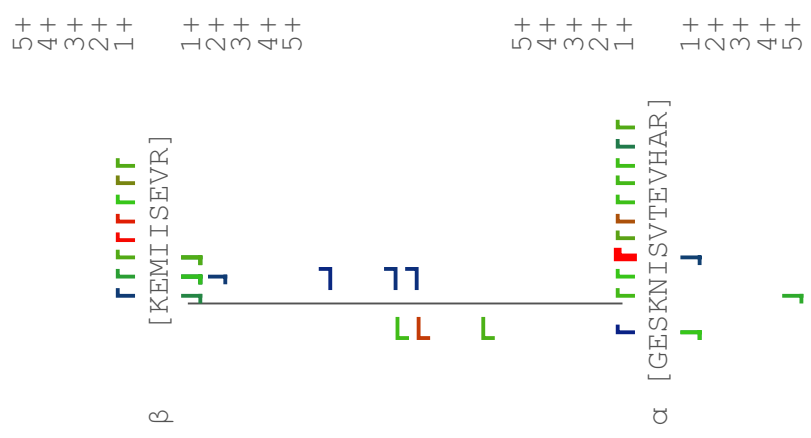

# K134-K293

theor.Mass(M+H+): 3148.686  
 PrecursorMass(M+H+): 3148.678  
 Deviation: -2.48ppm  
 m/z: 630.5414  
 Charge: +5

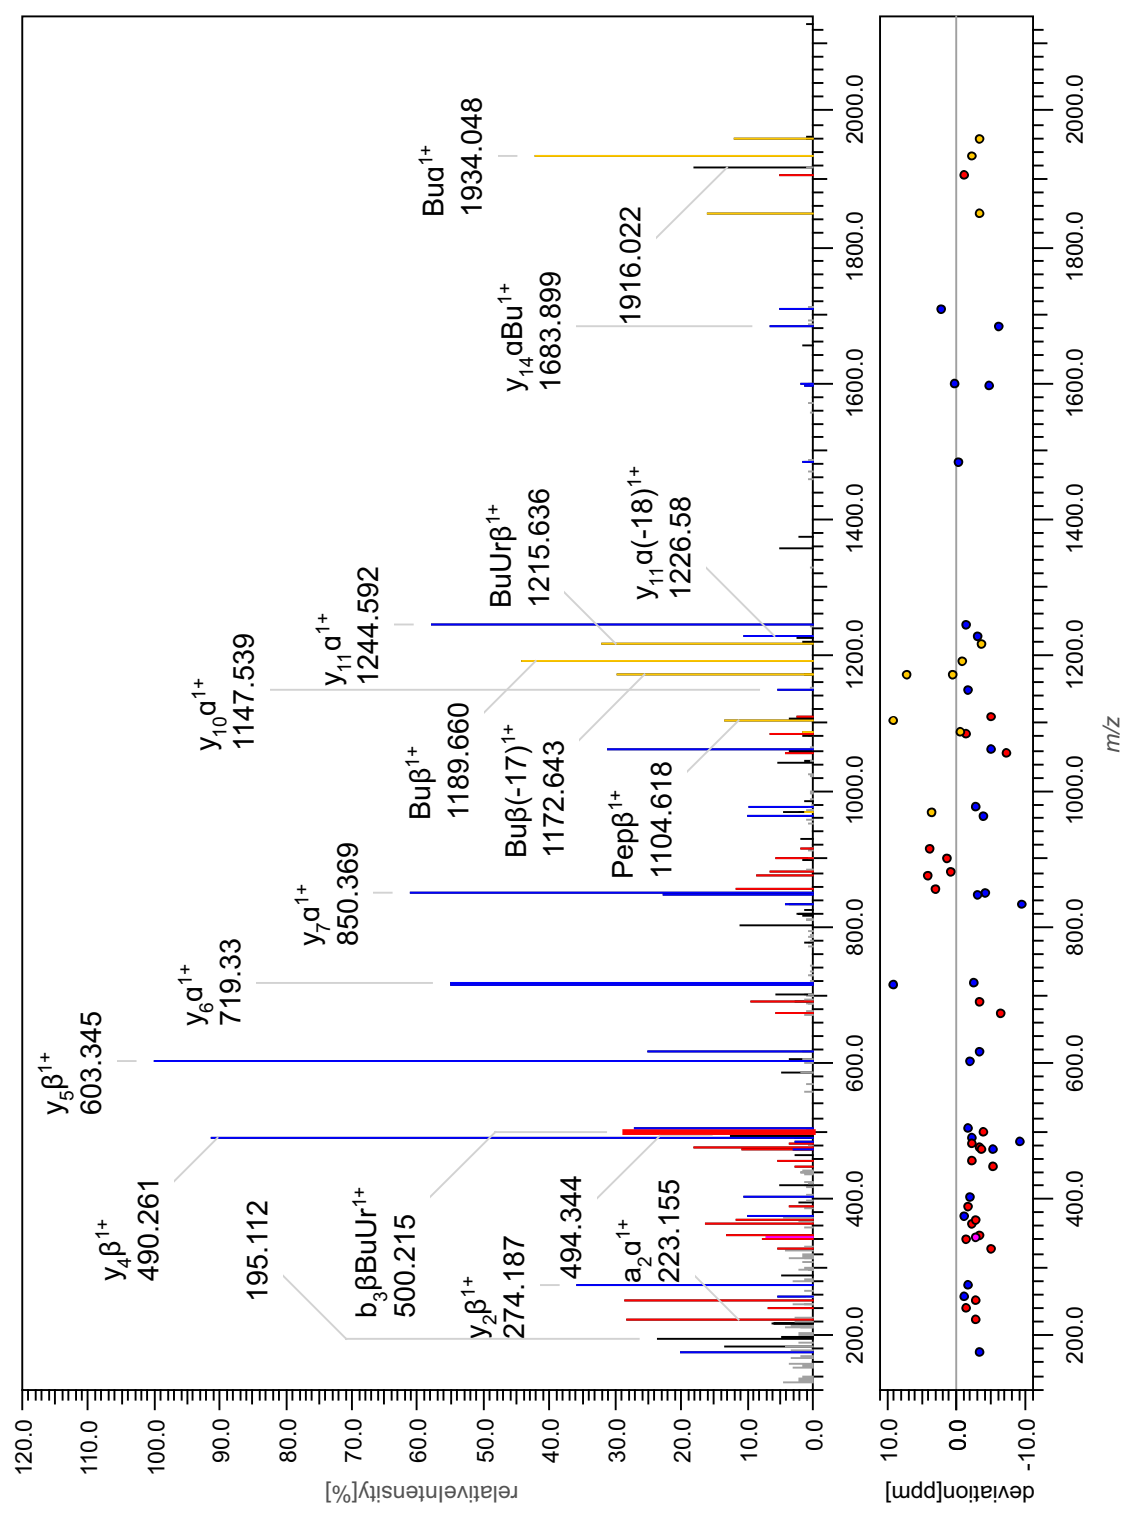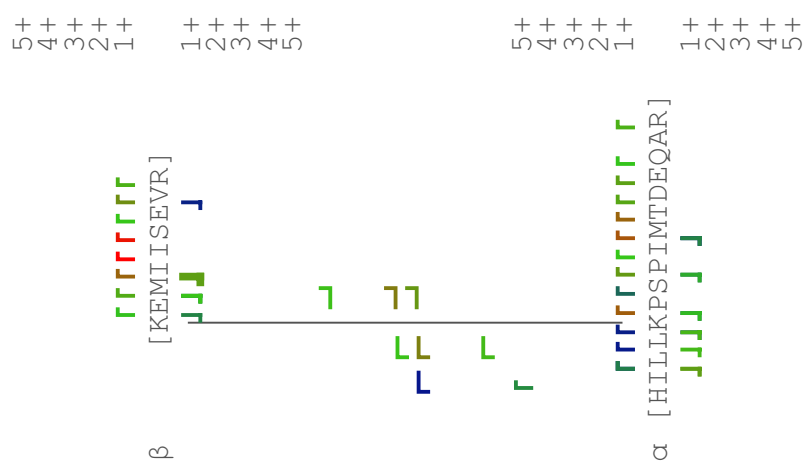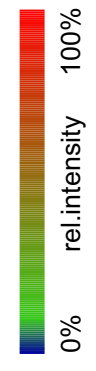

# K251-K278

theor.Mass(M+H+): 3536.907  
 PrecursorMass(M+H+): 3536.903  
 Deviation: -1.19ppm  
 m/z: 708.1864  
 Charge: +5

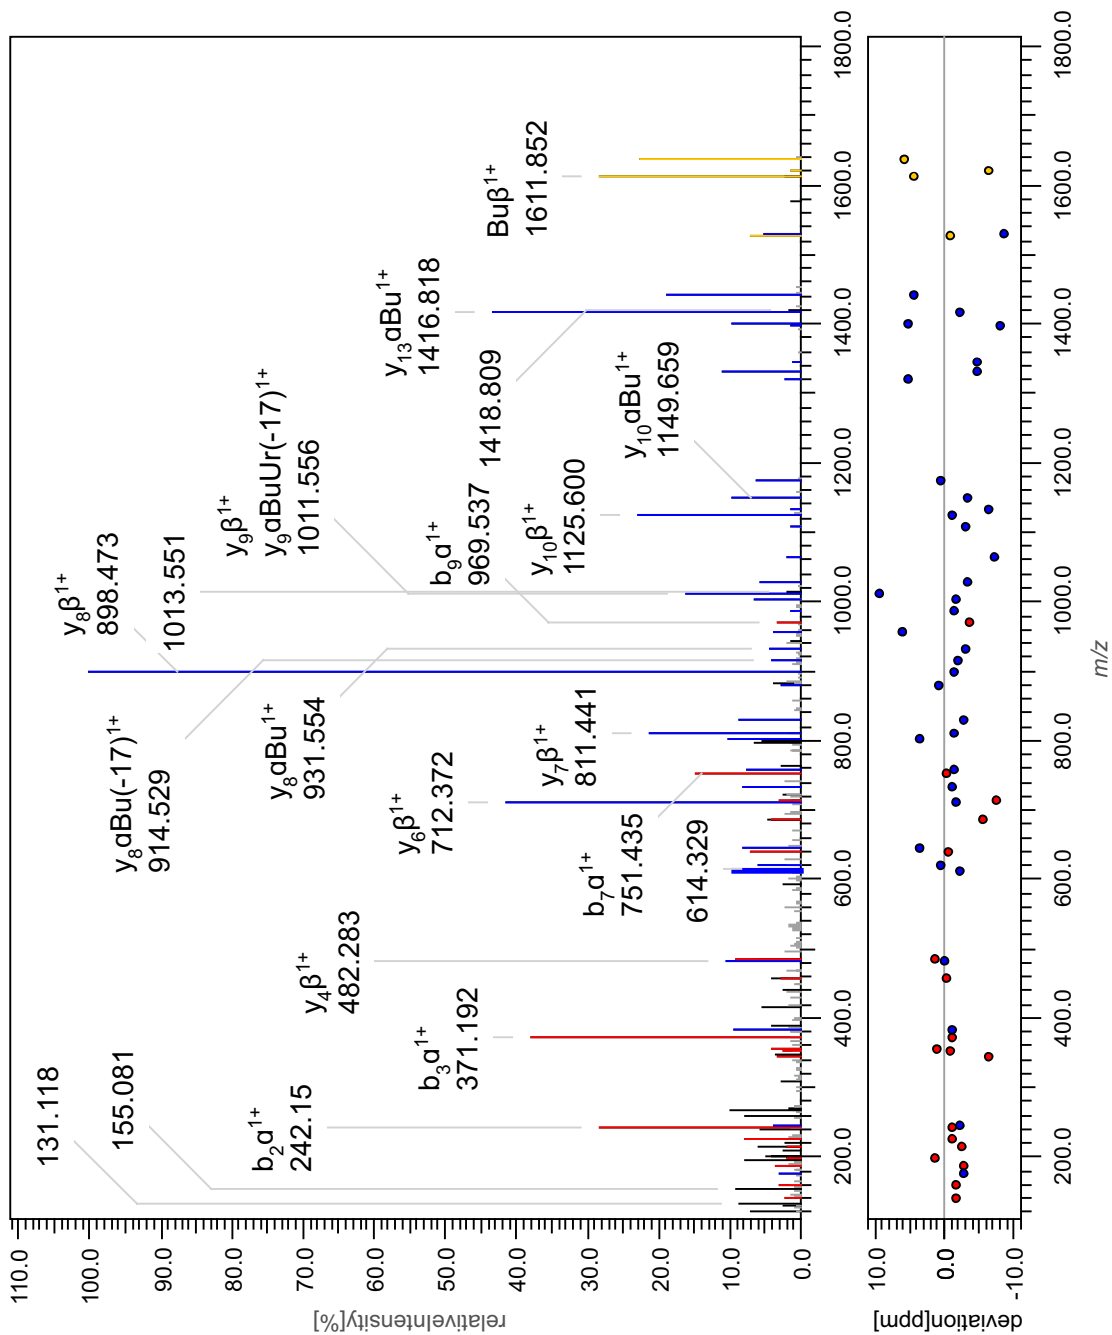

$\beta$  [GESKNI SVTEVHAR] 1+  
 $\alpha$  [IQELPGIFAQALSTAKK] 1+  
 $\beta$  [GESKNI SVTEVHAR] 1+

# K251-K293

theor.Mass(M+H+): 3859.115  
 PrecursorMass(M+H+): 3859.095  
 Deviation: -5.08ppm  
 m/z: 772.6249  
 Charge: +5

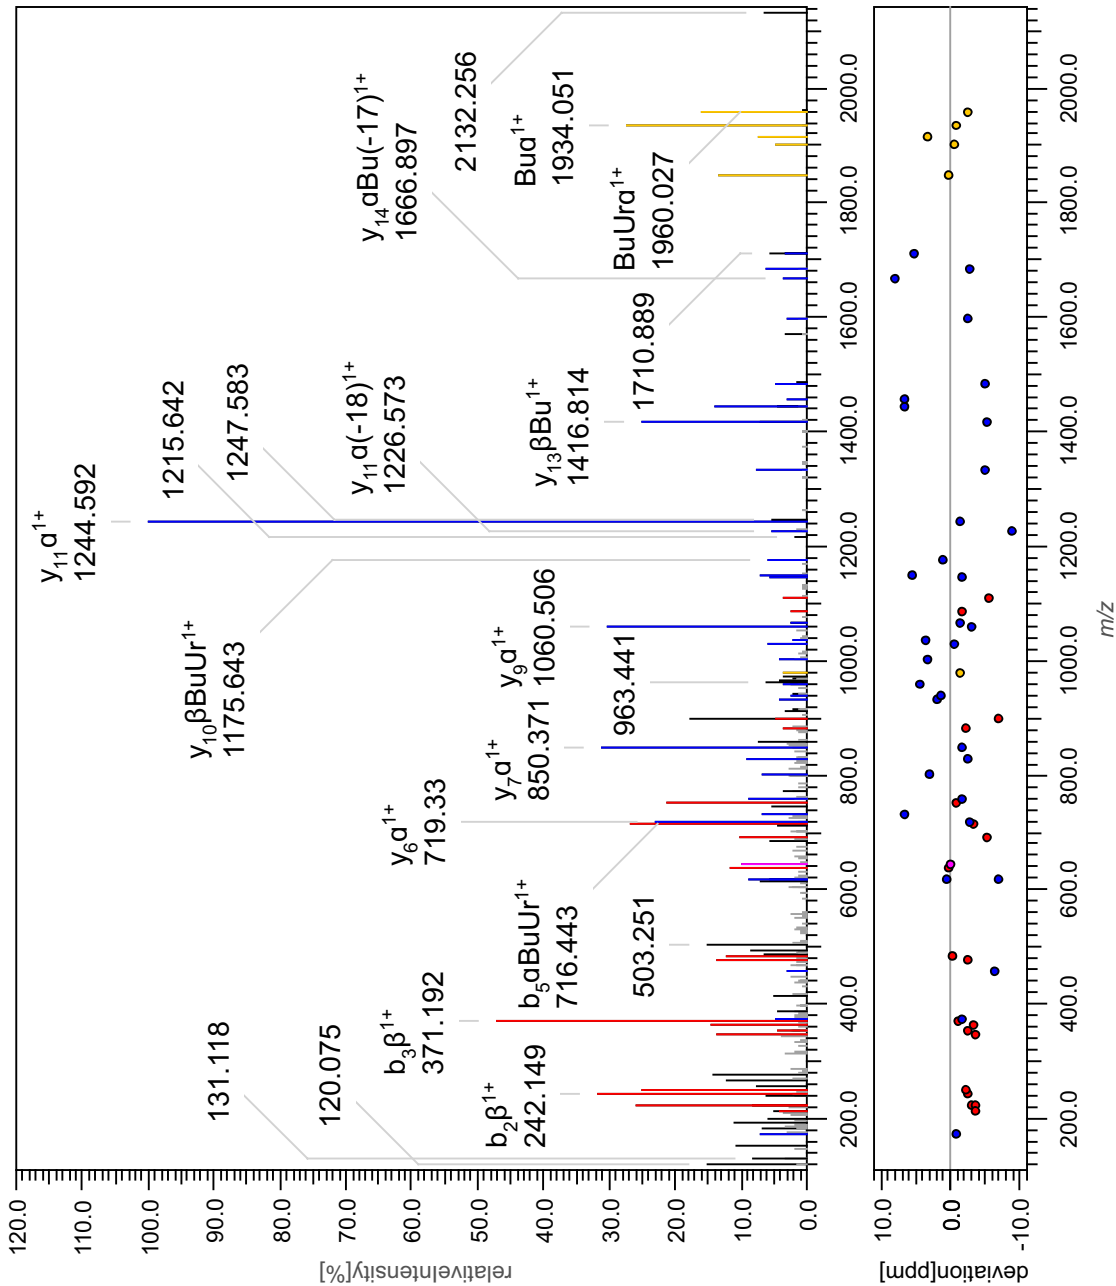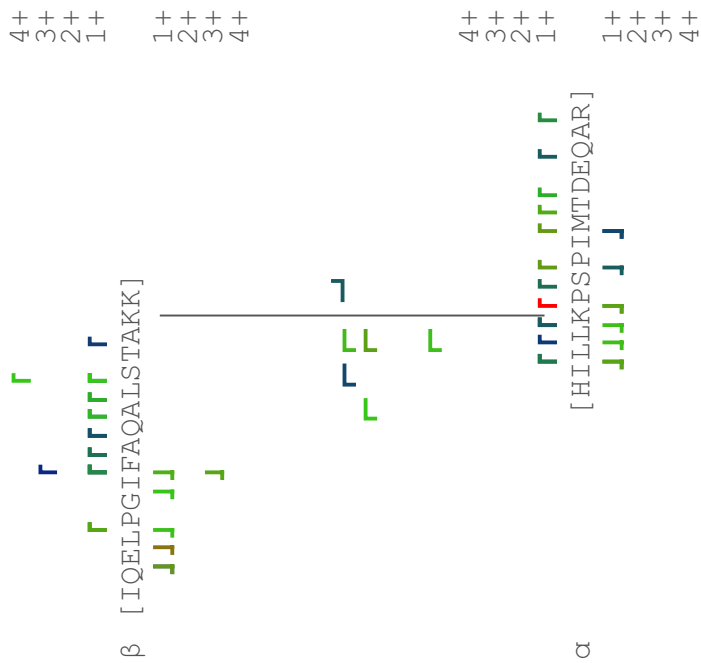

# K251-K405

theor.Mass(M+H+): 3736.9  
 PrecursorMass(M+H+): 3736.889  
 Deviation: -3.14 ppm  
 m/z: 934.9776  
 Charge: +4

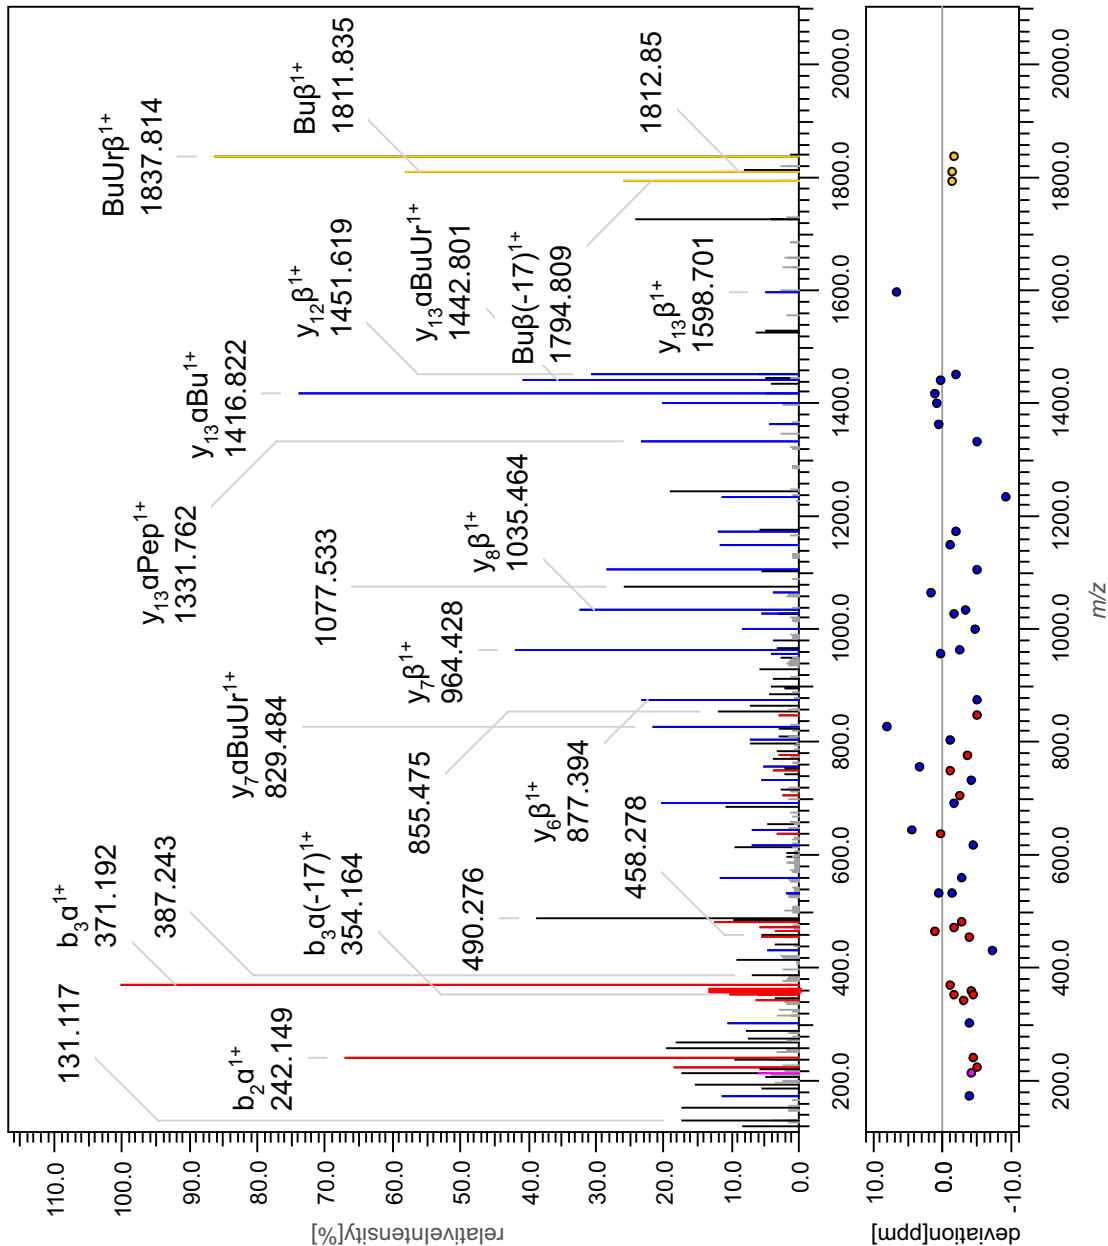

# K252-K278

theor.Mass(M+H+): 2676.443  
 PrecursorMass(M+H+): 2676.443  
 Deviation: -0.08ppm  
 m/z: 892.81903  
 Charge: +3

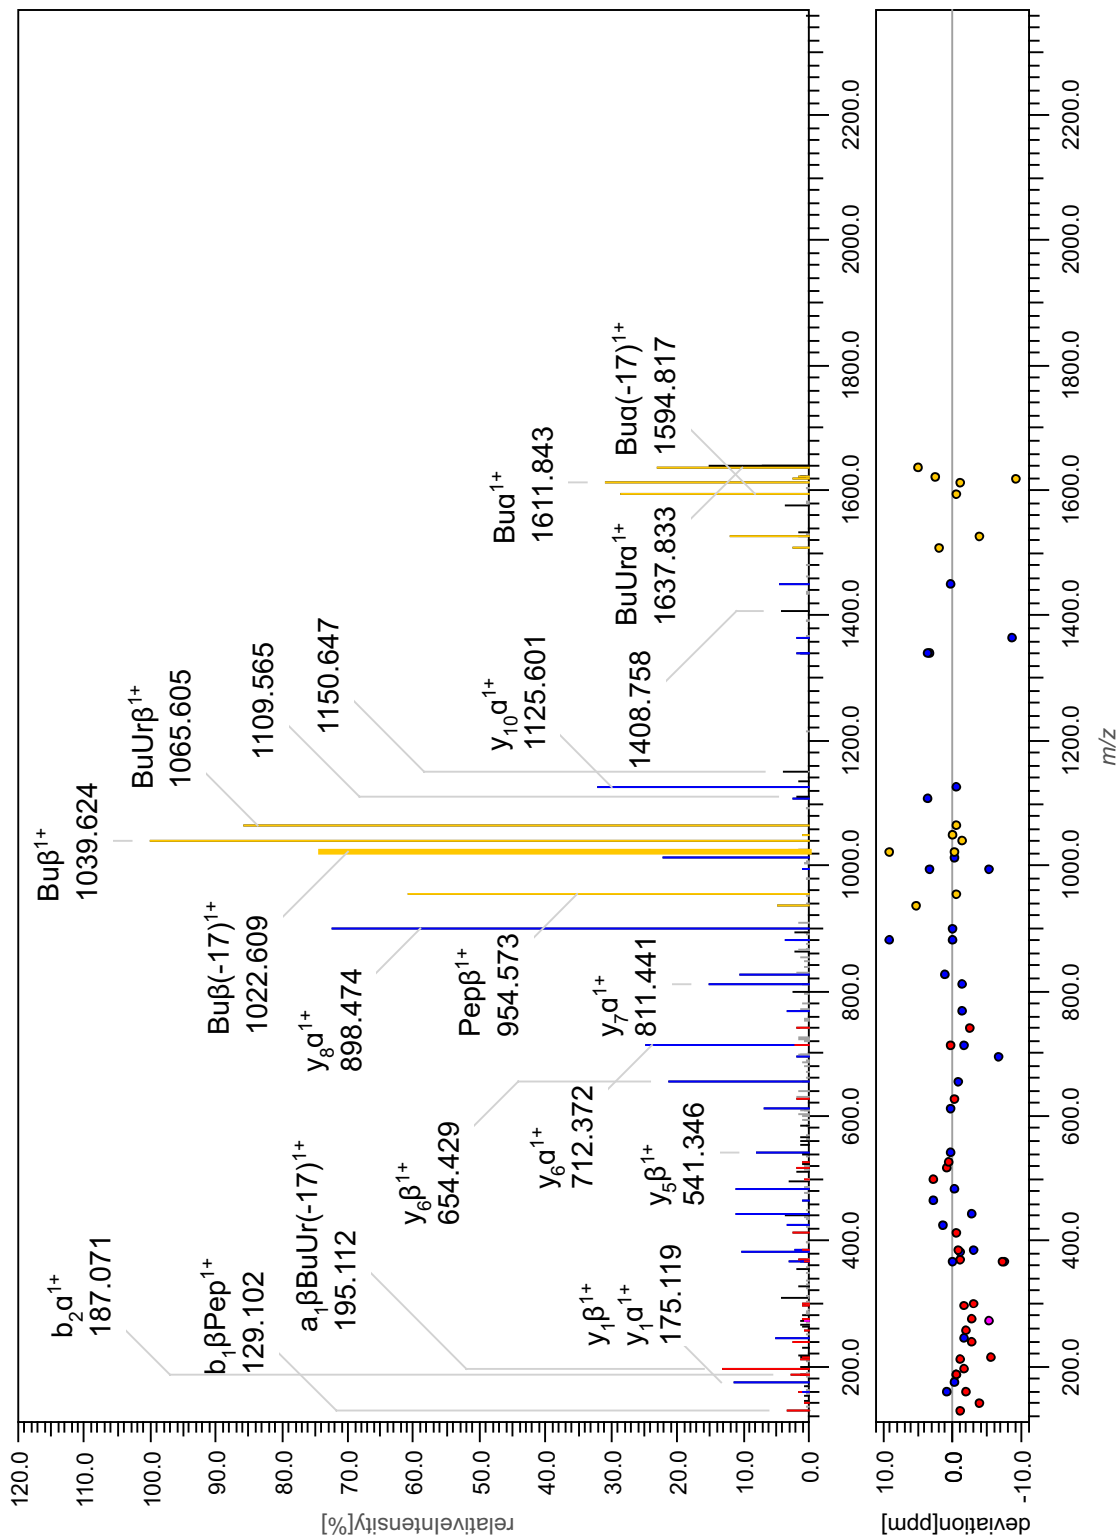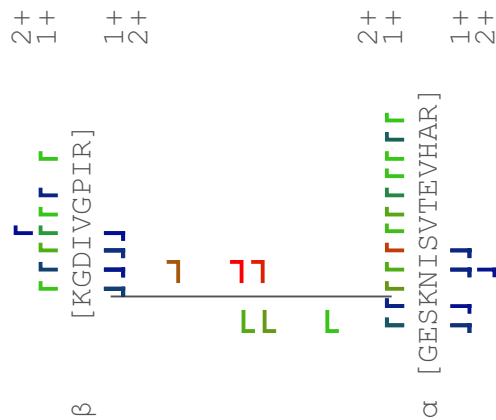

# K252-K293

theor.Mass(M+H+): 2998.651  
 PrecursorMass(M+H+): 2998.641  
 Deviation: -3.35ppm  
 m/z: 600.53394  
 Charge: +5

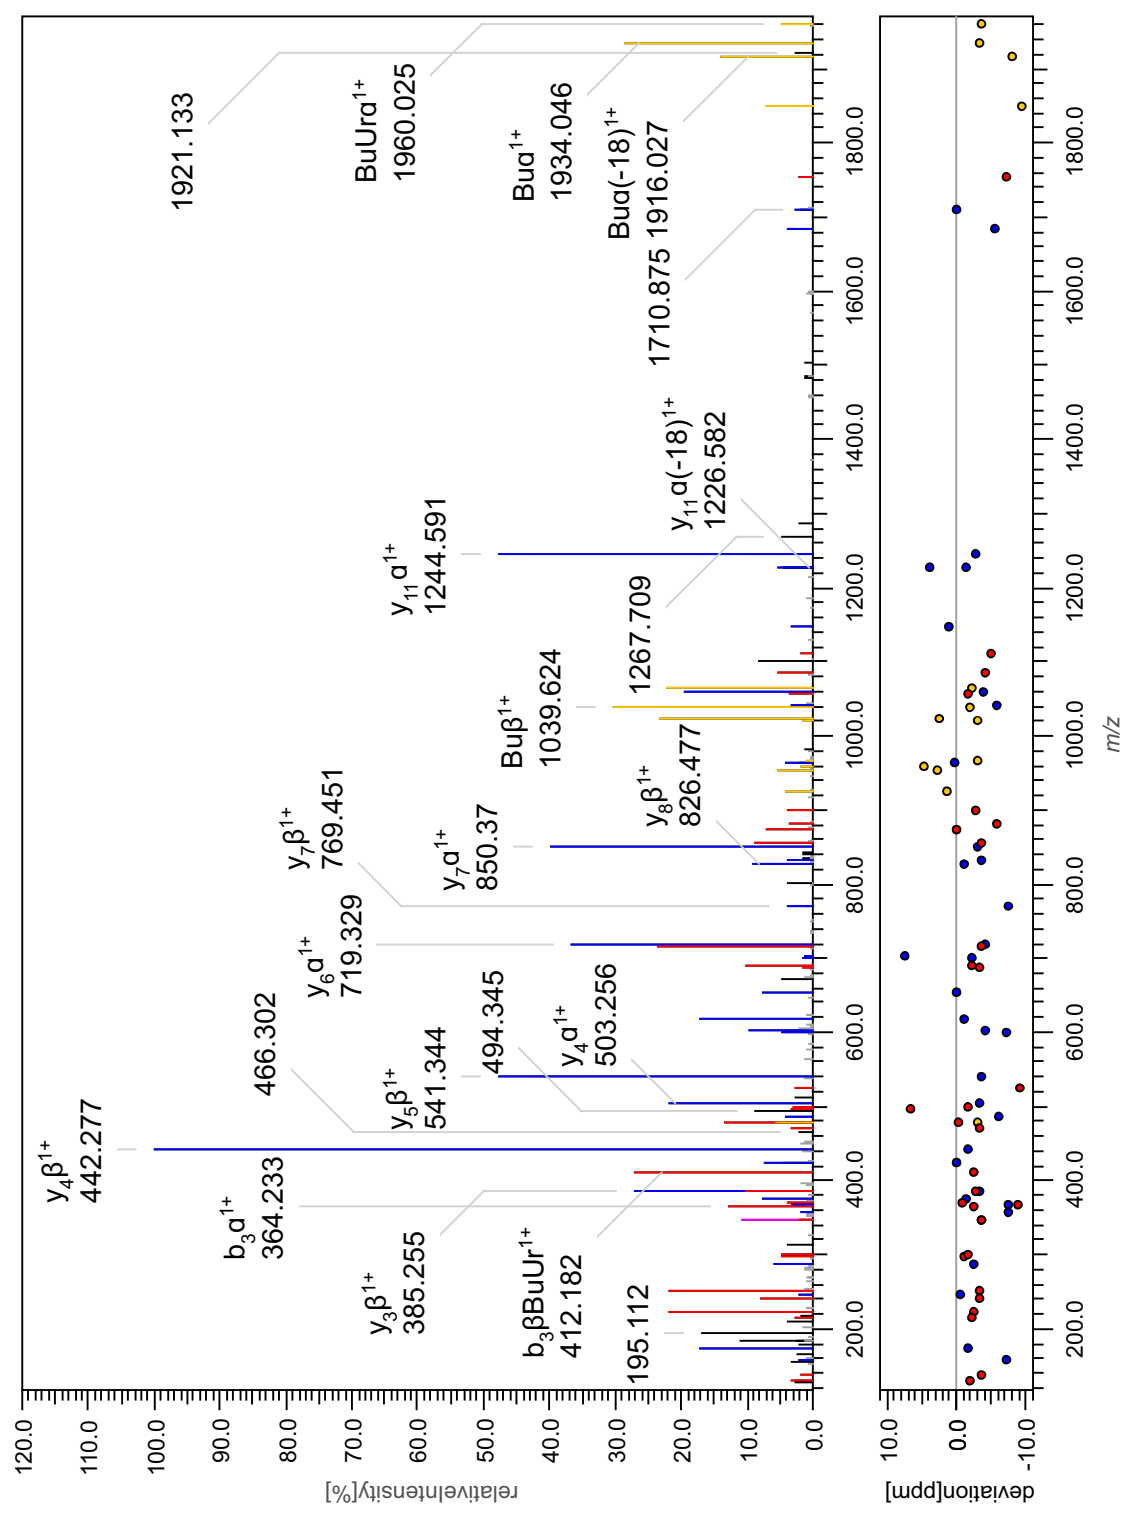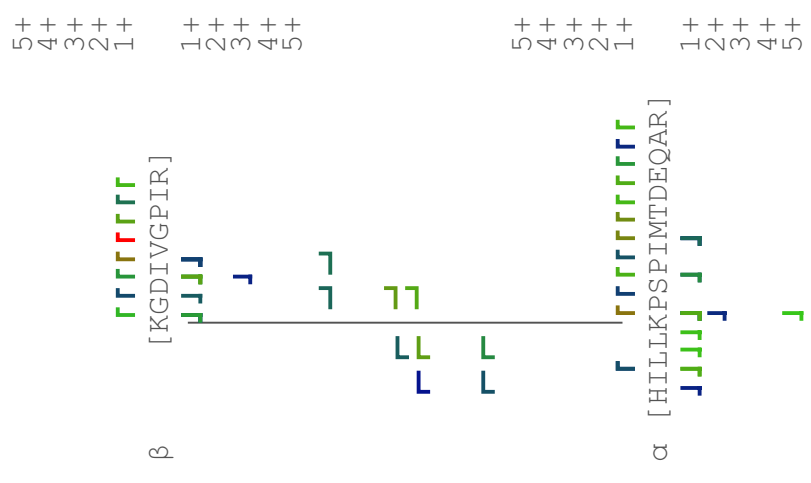

5+ 4+ 3+ 2+ 1+ 1+ 2+ 3+ 4+ 5+ 5+ 4+ 3+ 2+ 1+ 1+ 2+ 3+ 4+ 5+





# K252-K394

theor.Mass(M+H+):2510.332  
 PrecursorMass(M+H+):2510.329  
 Deviation:-1.34ppm  
 m/z:628.33765  
 Charge:+4

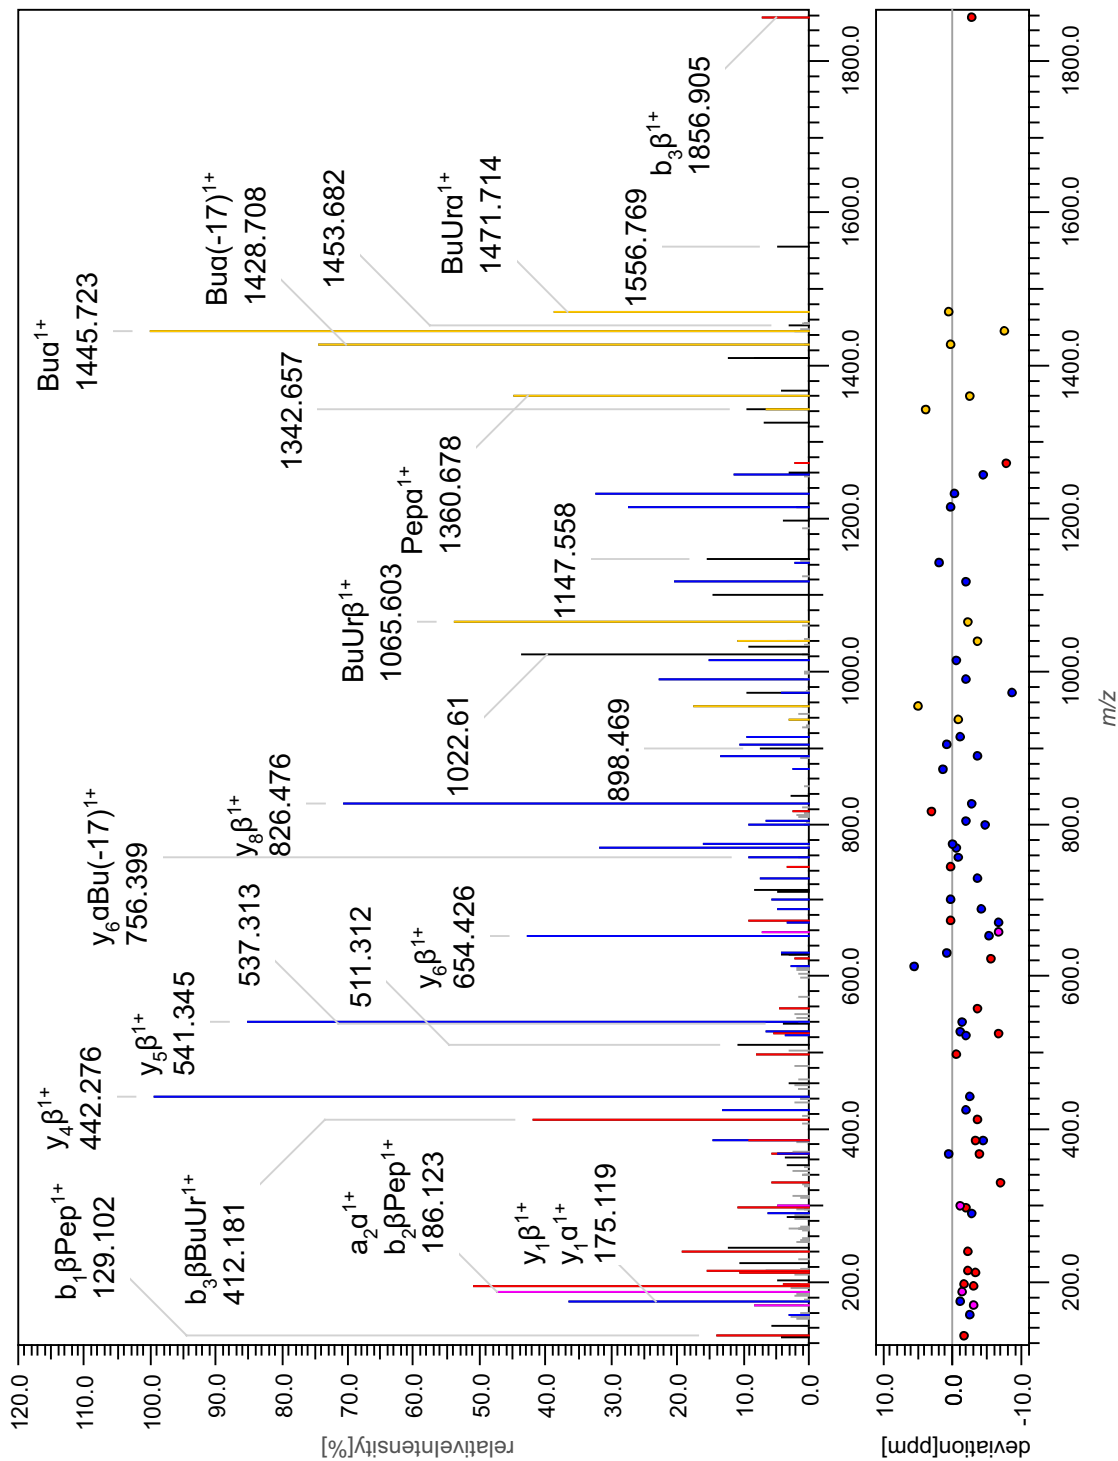

3+  
2+  
1+

β [KGDIVGPIR]

3+  
2+  
1+

α [NVDKTTDAAQKDR]

1+  
2+  
3+

0% rel.intensity 100%

# K269-K278

theor.Mass(M+H+): 3276.745  
 PrecursorMass(M+H+): 3276.743  
 Deviation: -0.63ppm  
 m/z: 656.15436  
 Charge: +5

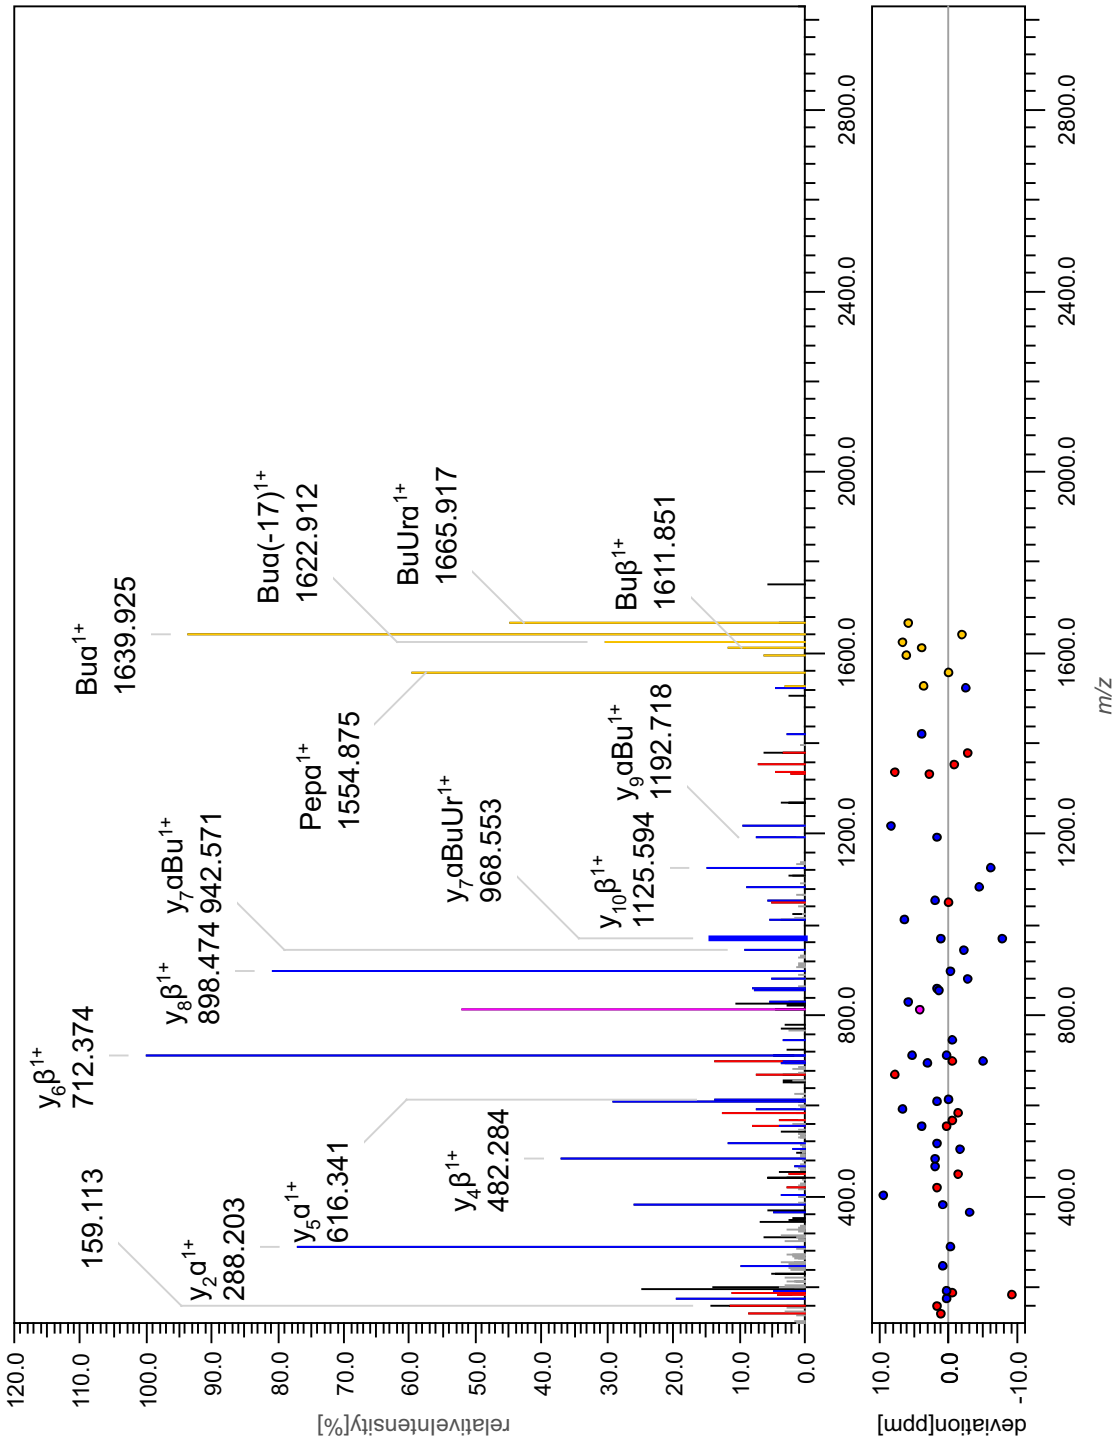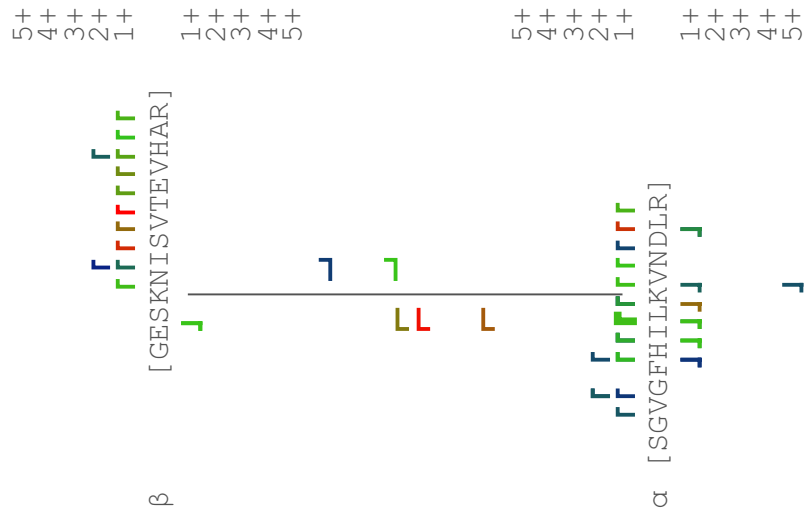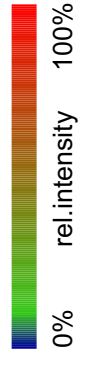

theor.Mass(M+H+): 3598.953  
 PrecursorMass(M+H+): 3598.947  
 Deviation: -1.57 ppm  
 m/z: 900.4922  
 Charge: +4

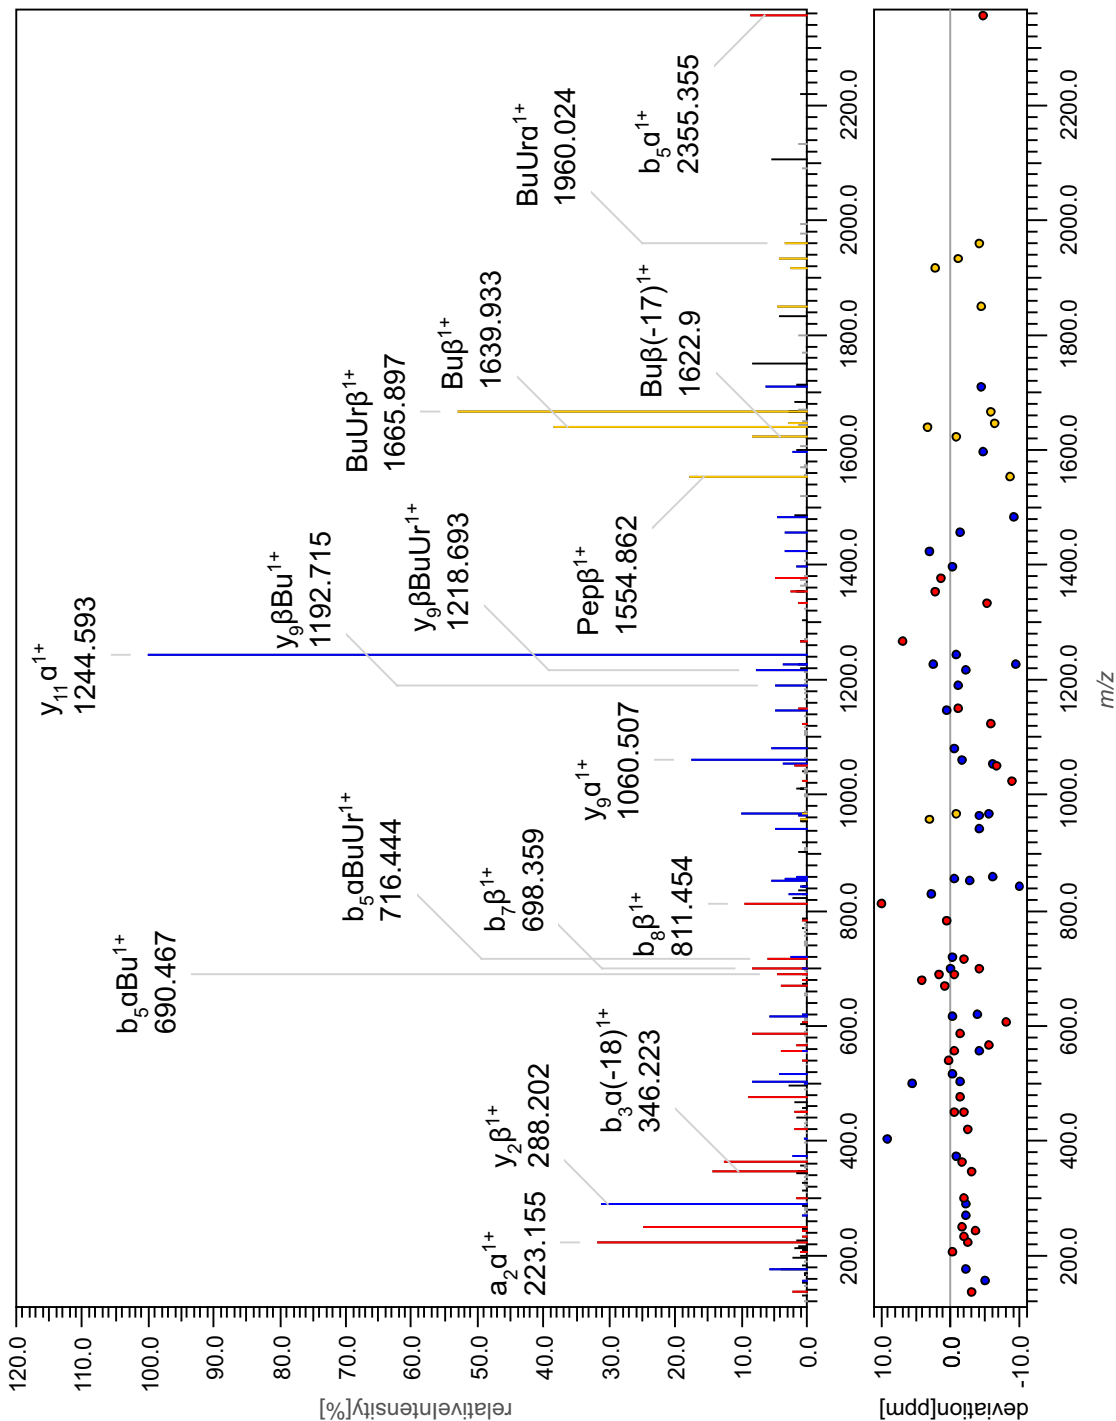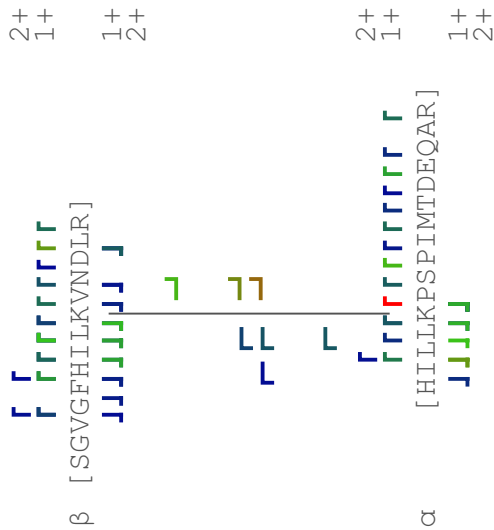

theor.Mass(M+H+):2654.401  
 PrecursorMass(M+H+):2654.394  
 Deviation:-2.44ppm  
 m/z:664.35406  
 Charge:+4

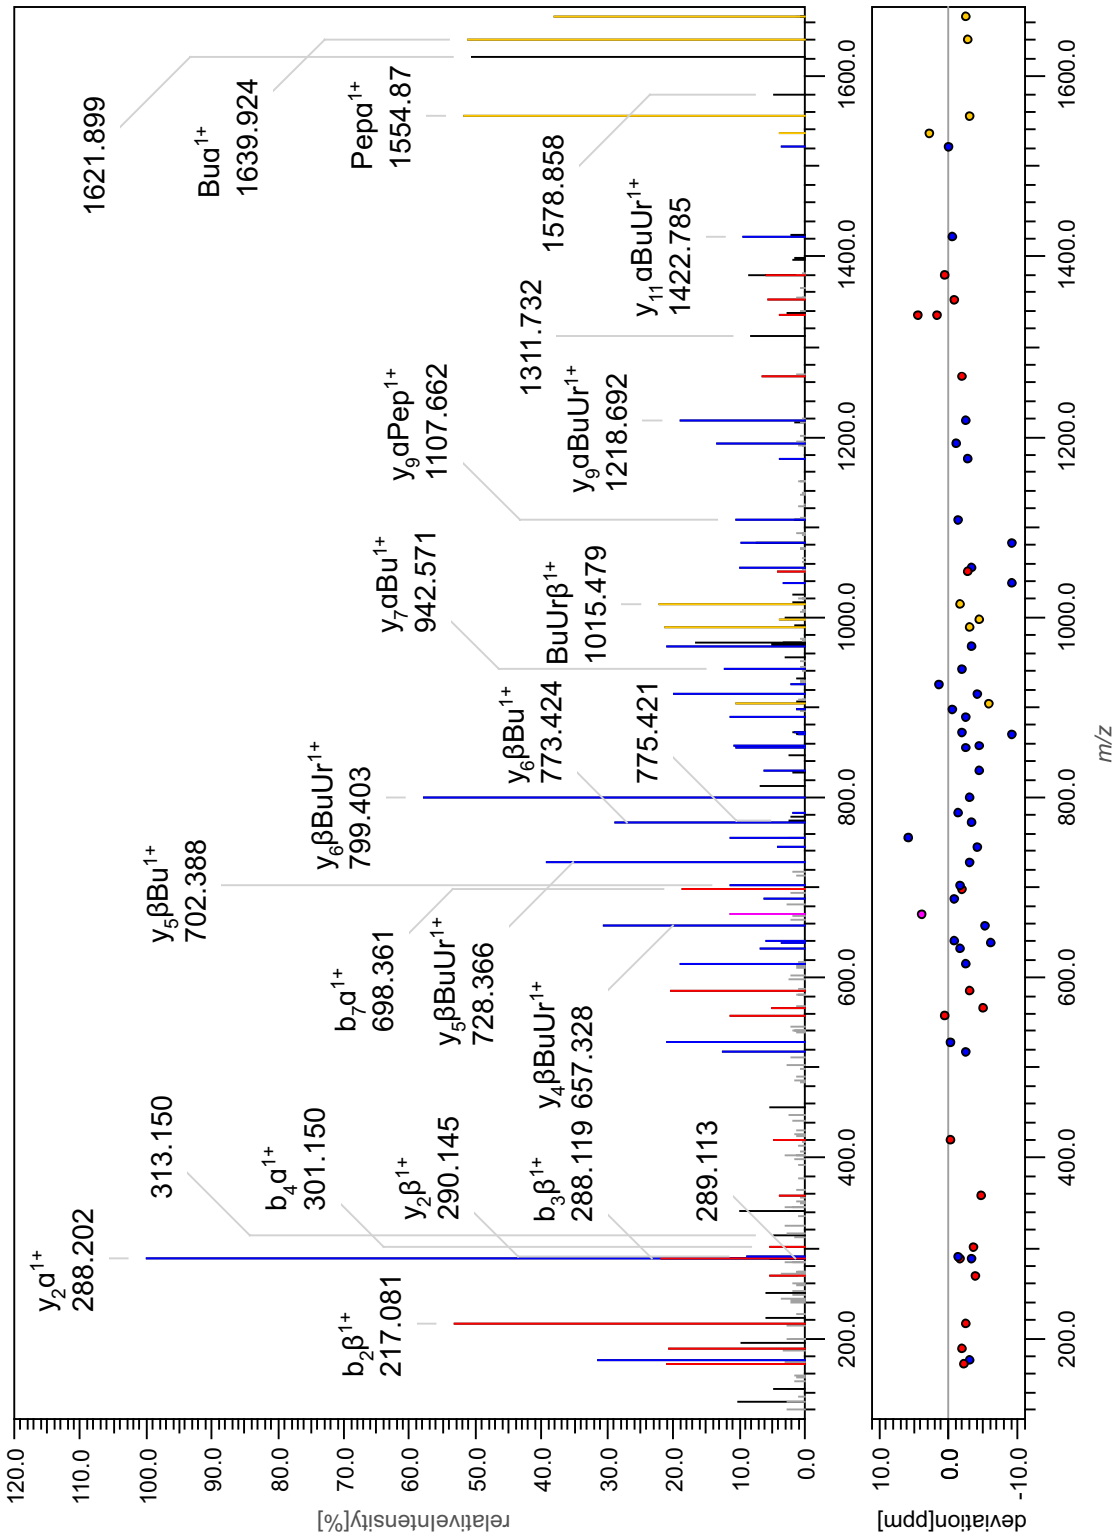

theor.Mass(M+H+):2626.318  
 PrecursorMass(M+H+):2626.312  
 Deviation-2.44ppm  
 m/z:876.1087  
 Charge:+3

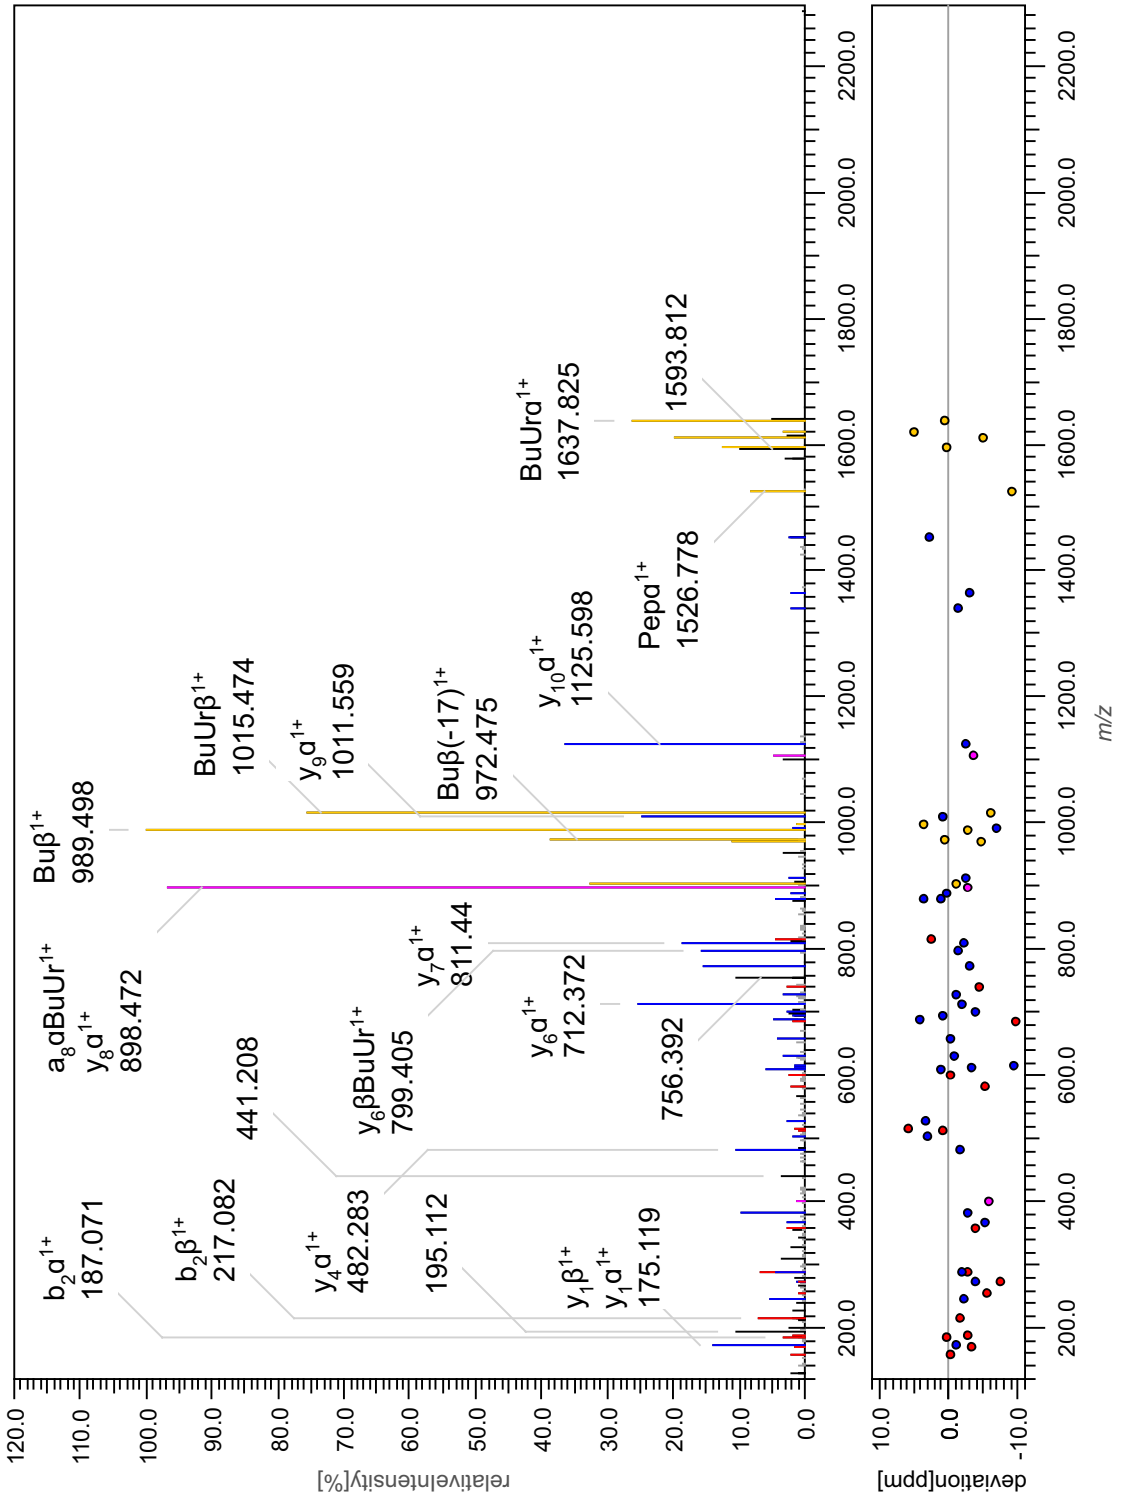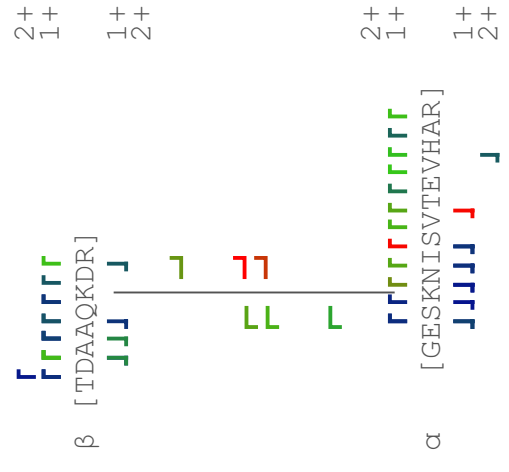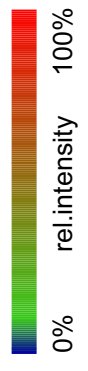

# K278-K405

theor.Mass(M+H+): 3448.655  
 PrecursorMass(M+H+): 3448.65  
 Deviation: -1.52ppm  
 m/z: 862.9179  
 Charge: +4

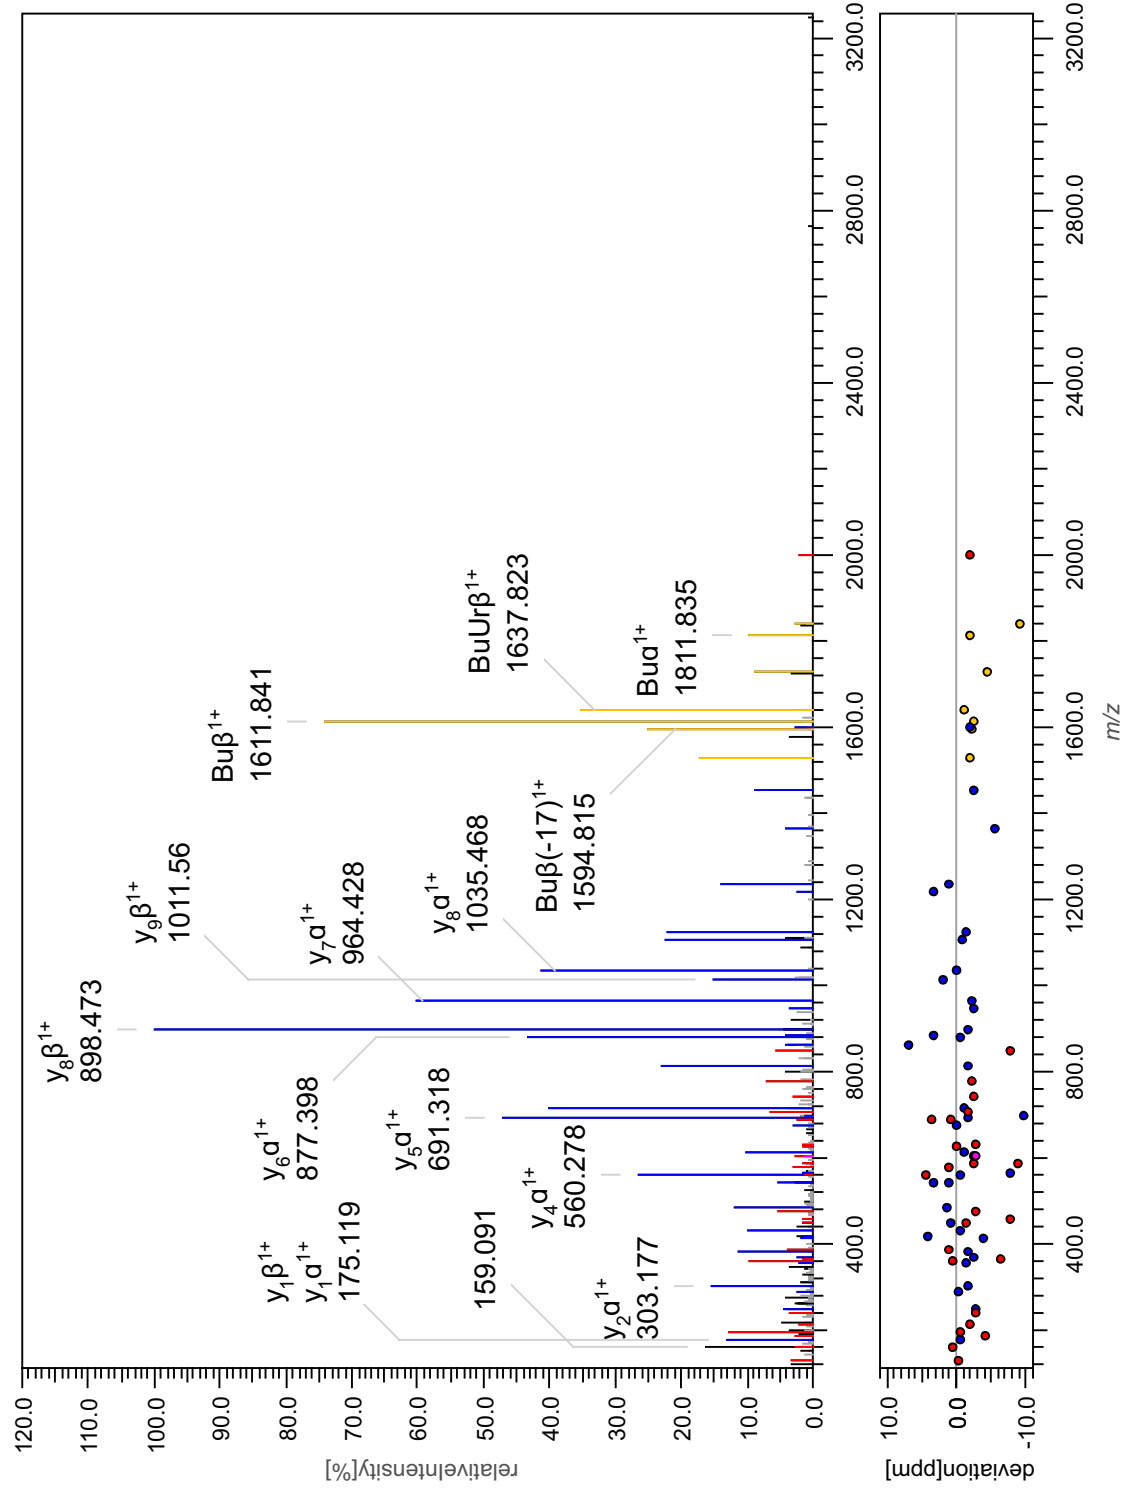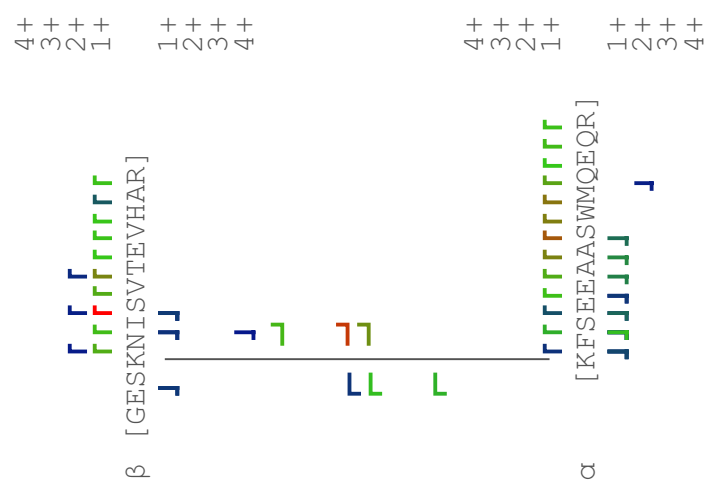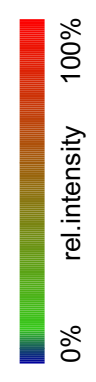

theor.Mass(M+H+):2948.526  
 PrecursorMass(M+H+):2948.52  
 Deviation-2.0ppm  
 m/z:737.88544  
 Charge:+4

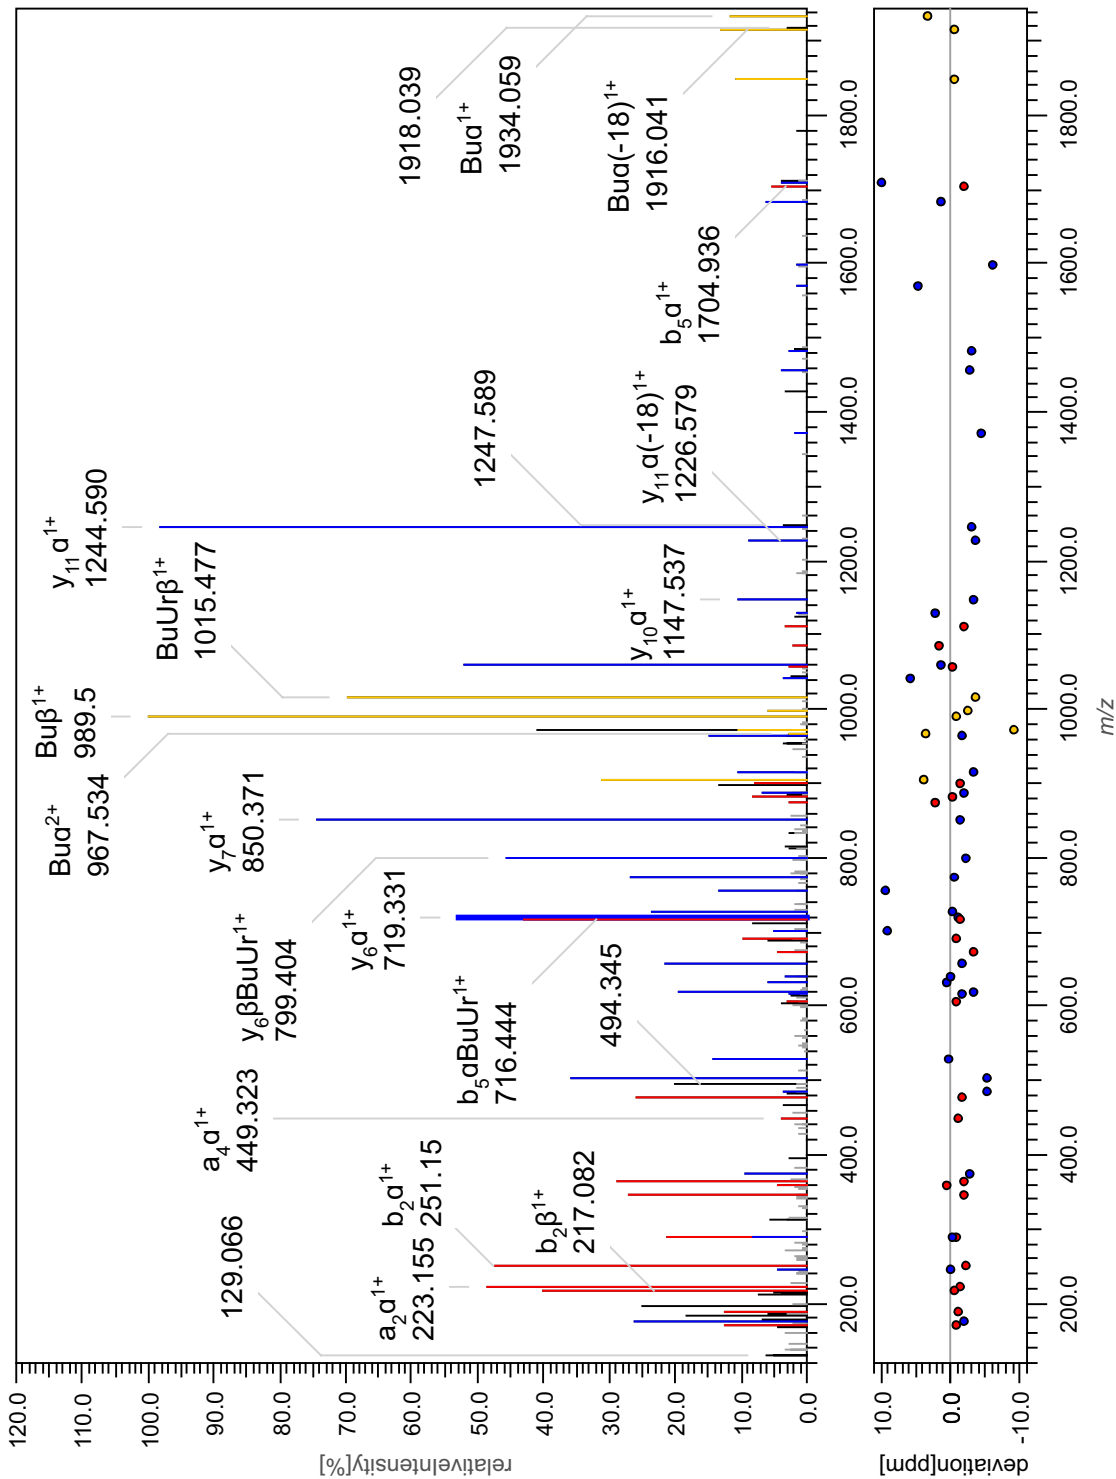



# K293-K405

theor.Mass(M+H+):3770.863  
 PrecursorMass(M+H+):3770.854  
 Deviation:-2.42ppm  
 m/z:943.4689  
 Charge:+4

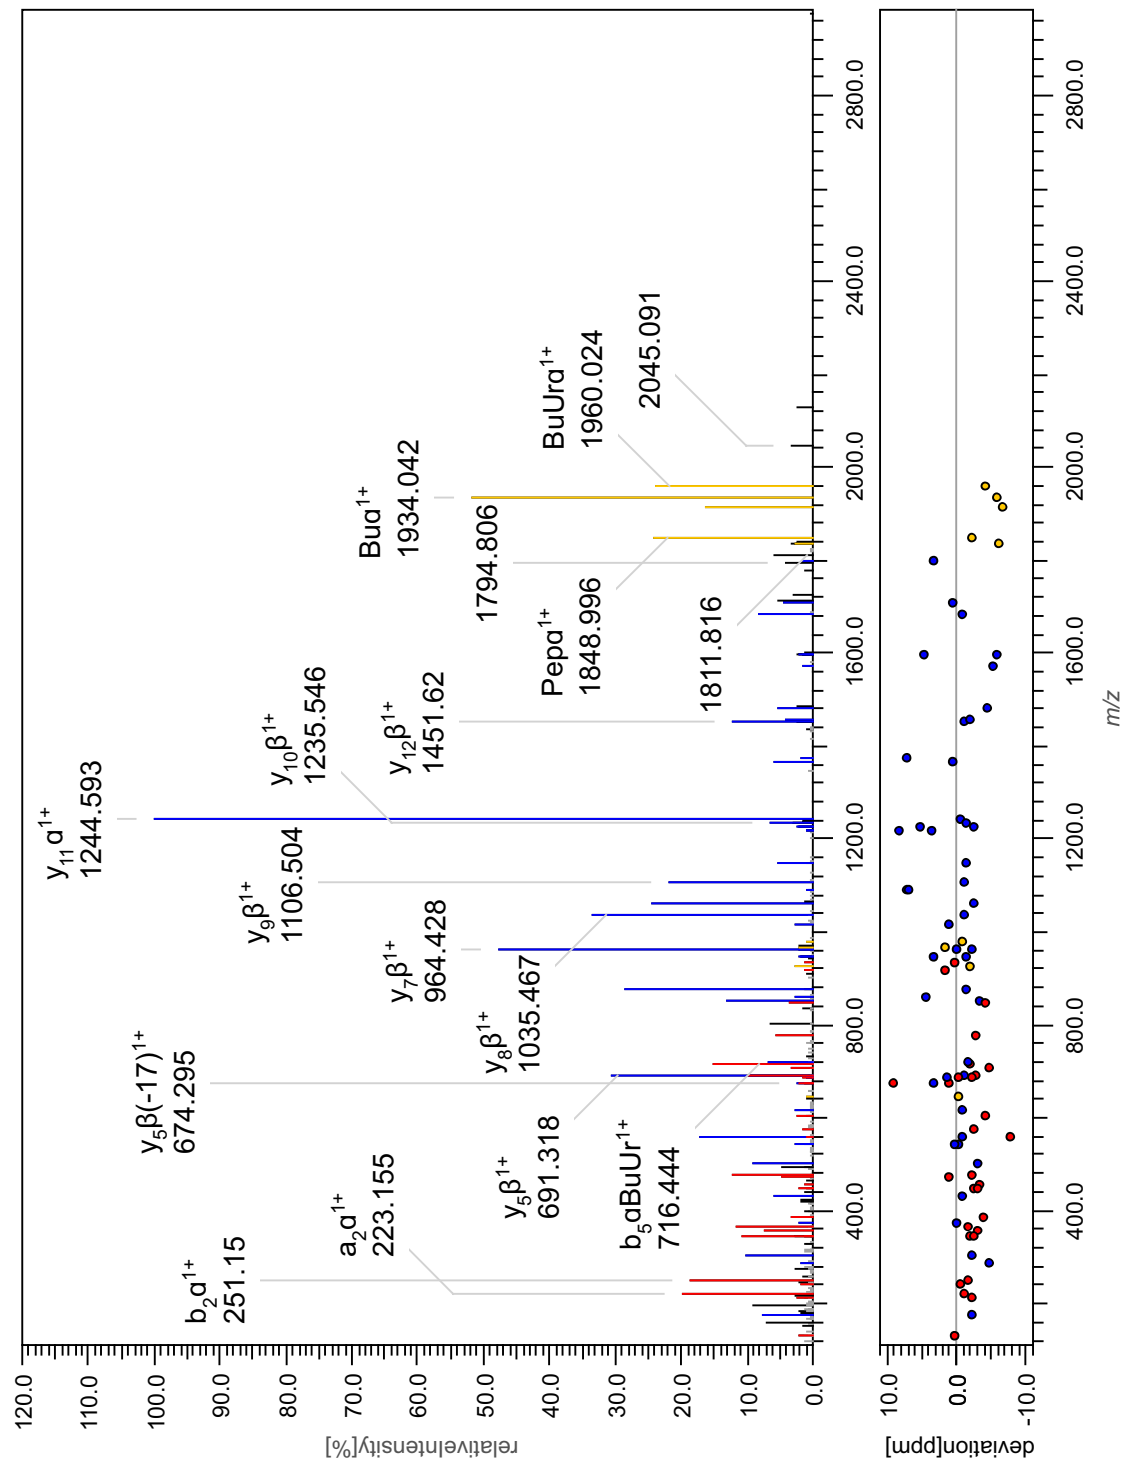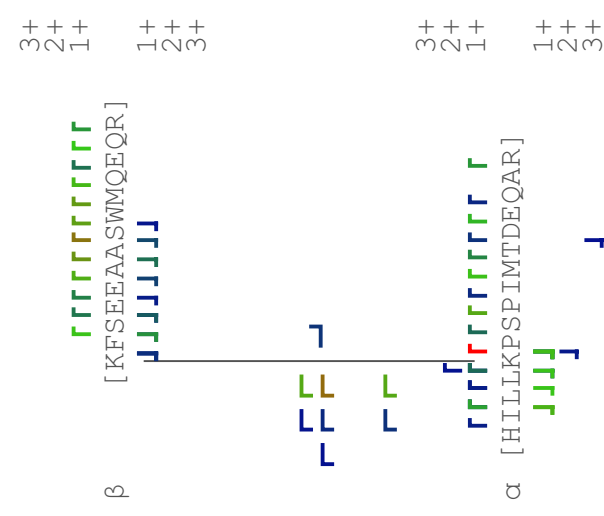

# K362-K405

theor.Mass(M+H+): 4758.319  
 PrecursorMass(M+H+): 4758.302  
 Deviation: -3.57 ppm  
 m/z: 952.46625  
 Charge: +5

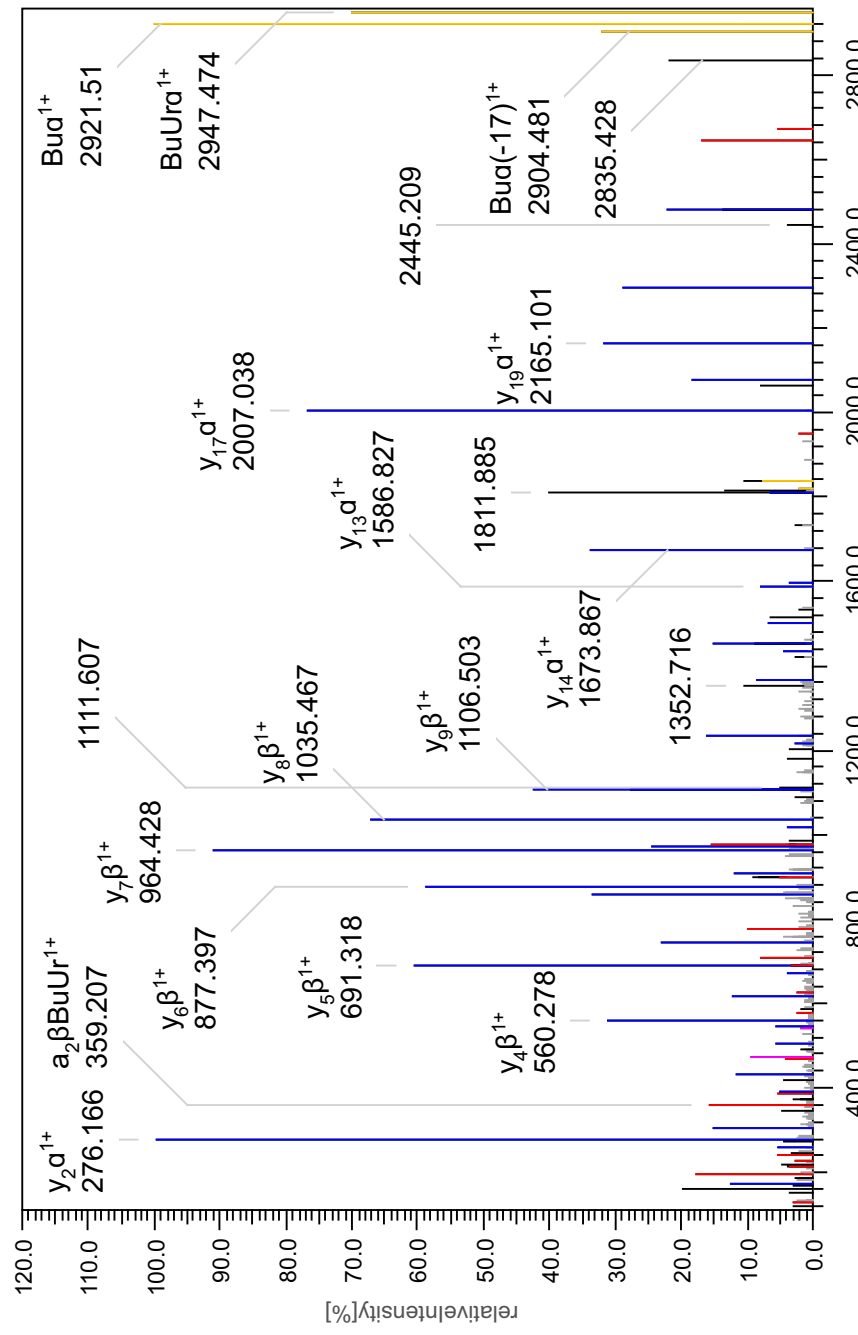

β [KFSEEAASMMQEQR]  
 5+  
 4+  
 3+  
 2+  
 1+  
 1+  
 2+  
 3+  
 4+  
 5+

α [LNKGQMSAPVHSSFGWHLIELLDTR]  
 5+  
 4+  
 3+  
 2+  
 1+  
 1+  
 2+  
 3+  
 4+  
 5+

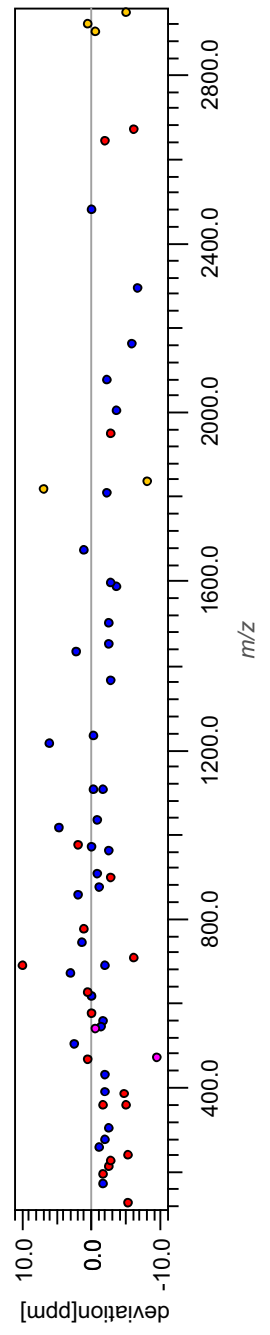

XL-MS spectra of DSBU crosslinks detected between SurA and OmpX.

SurA K87  
OmpX K50

theor.Mass(M+H+):3226.697  
PrecursorMass(M+H+):3226.691  
Deviation:-1.91ppm  
m/z:807.4282  
Charge:+4

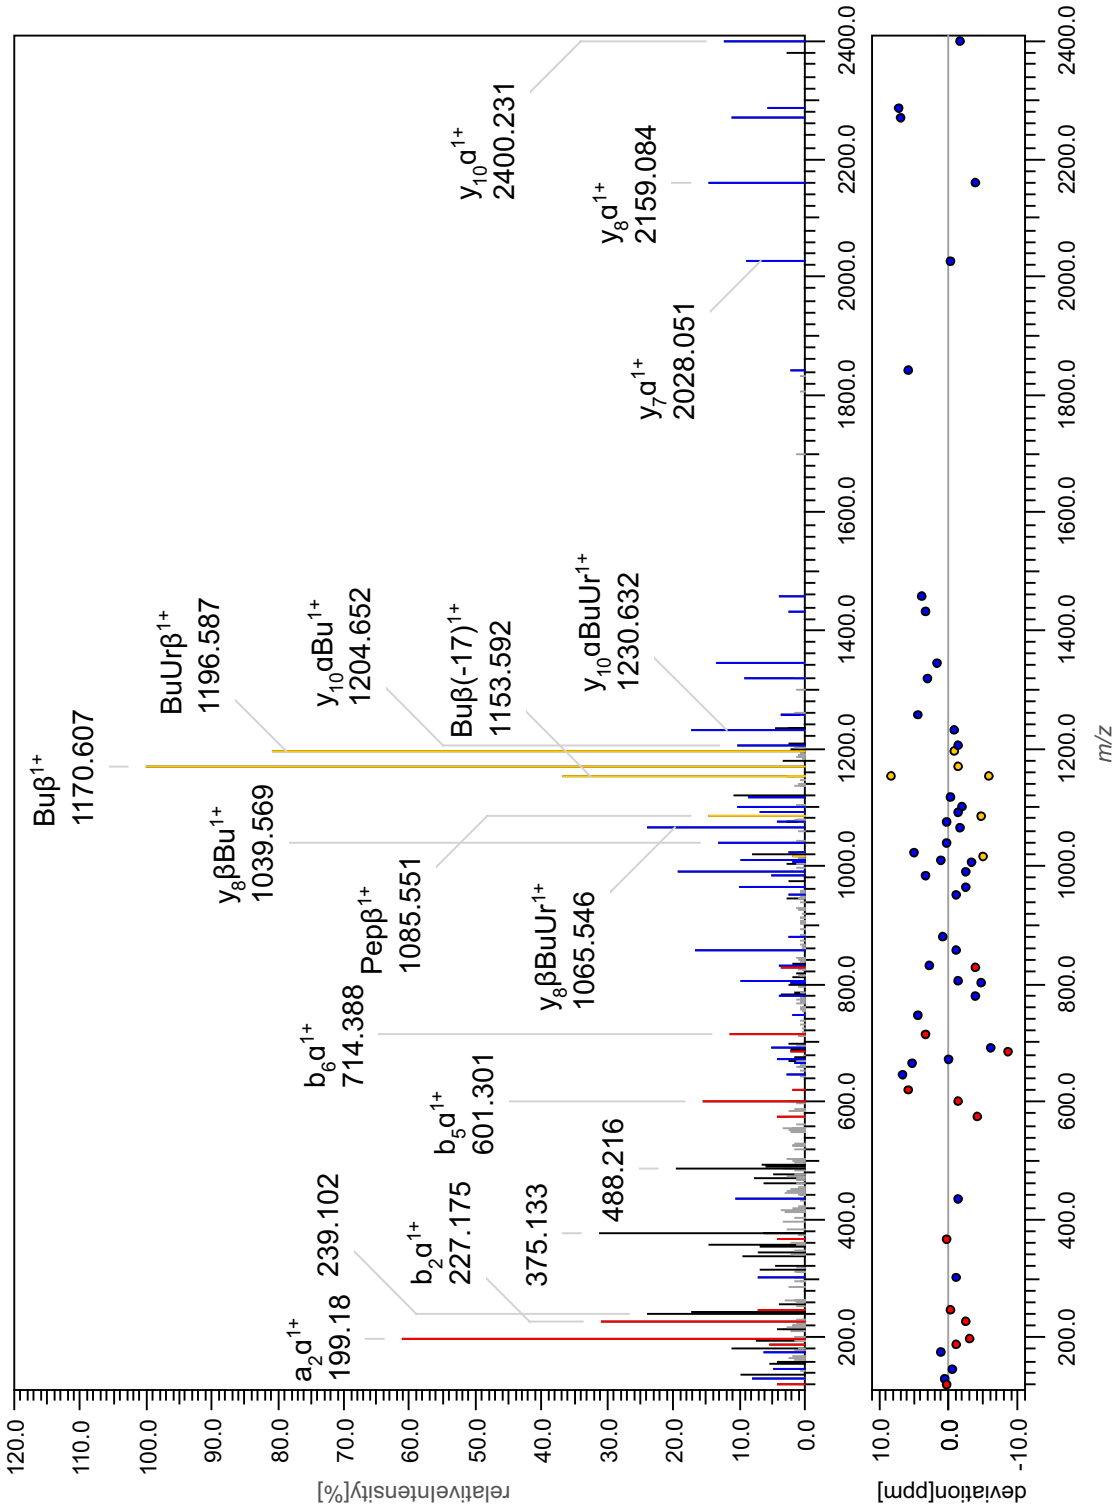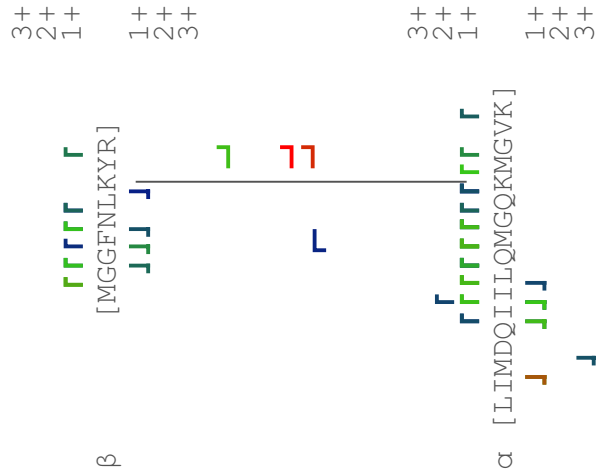

SurA K87  
OmpX K82

theor.Mass(M+H+):4538.252  
PrecursorMass(M+H+):4538.231  
Deviation-4.63ppm  
m/z:1135.3131  
Charge:+4

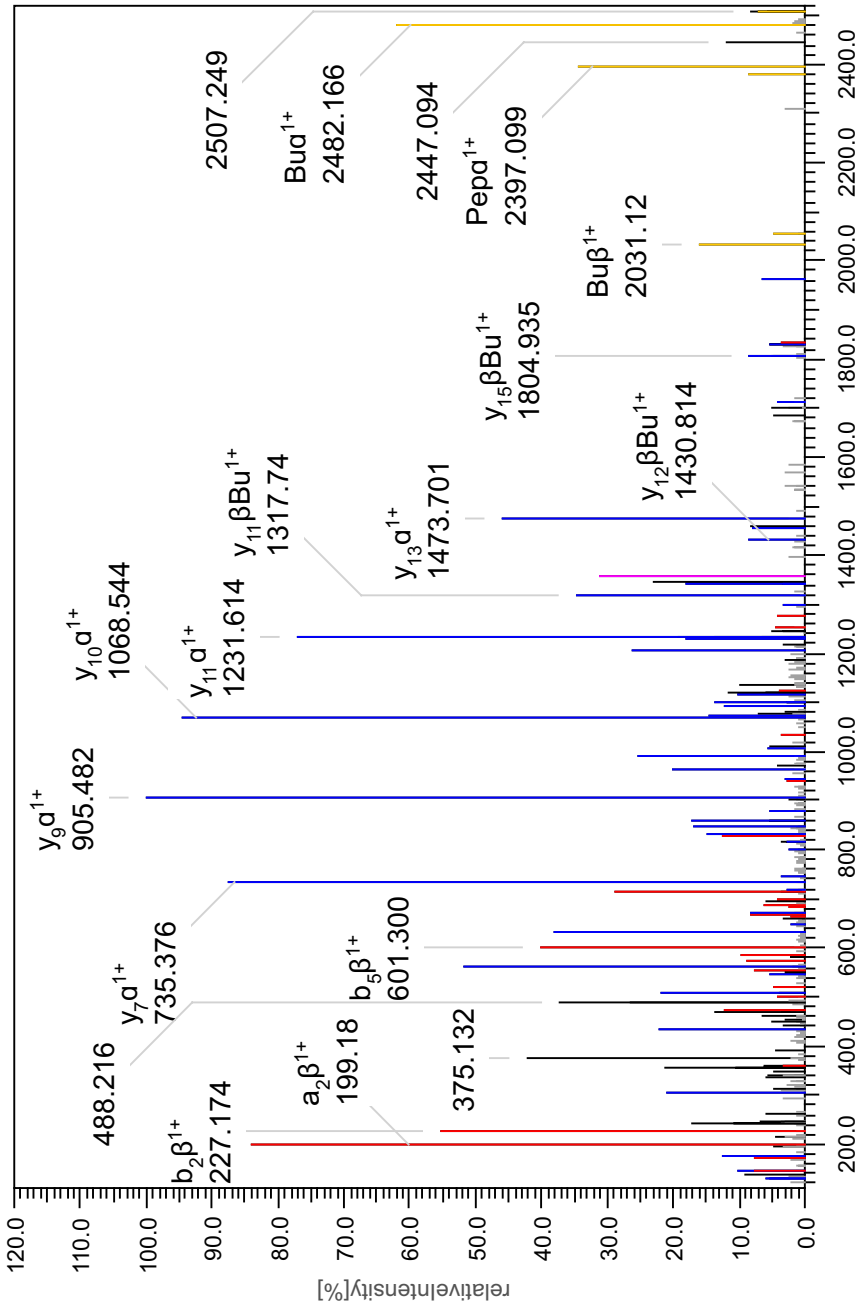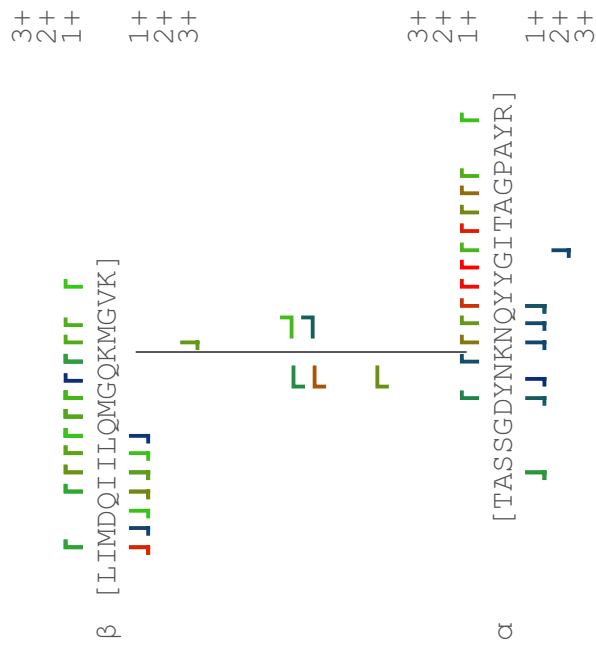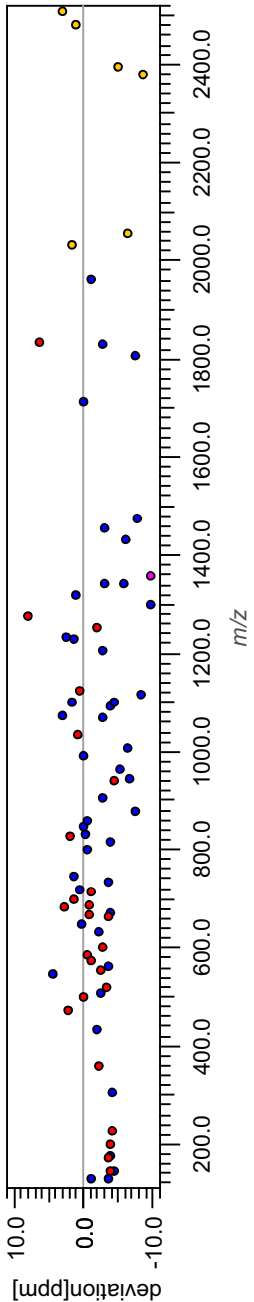

SurA K91  
OmpX K82

theor.Mass(M+H+):4636.262  
PrecursorMass(M+H+):4636.27  
Deviation1.67ppm  
m/z:1159.823  
Charge:+4

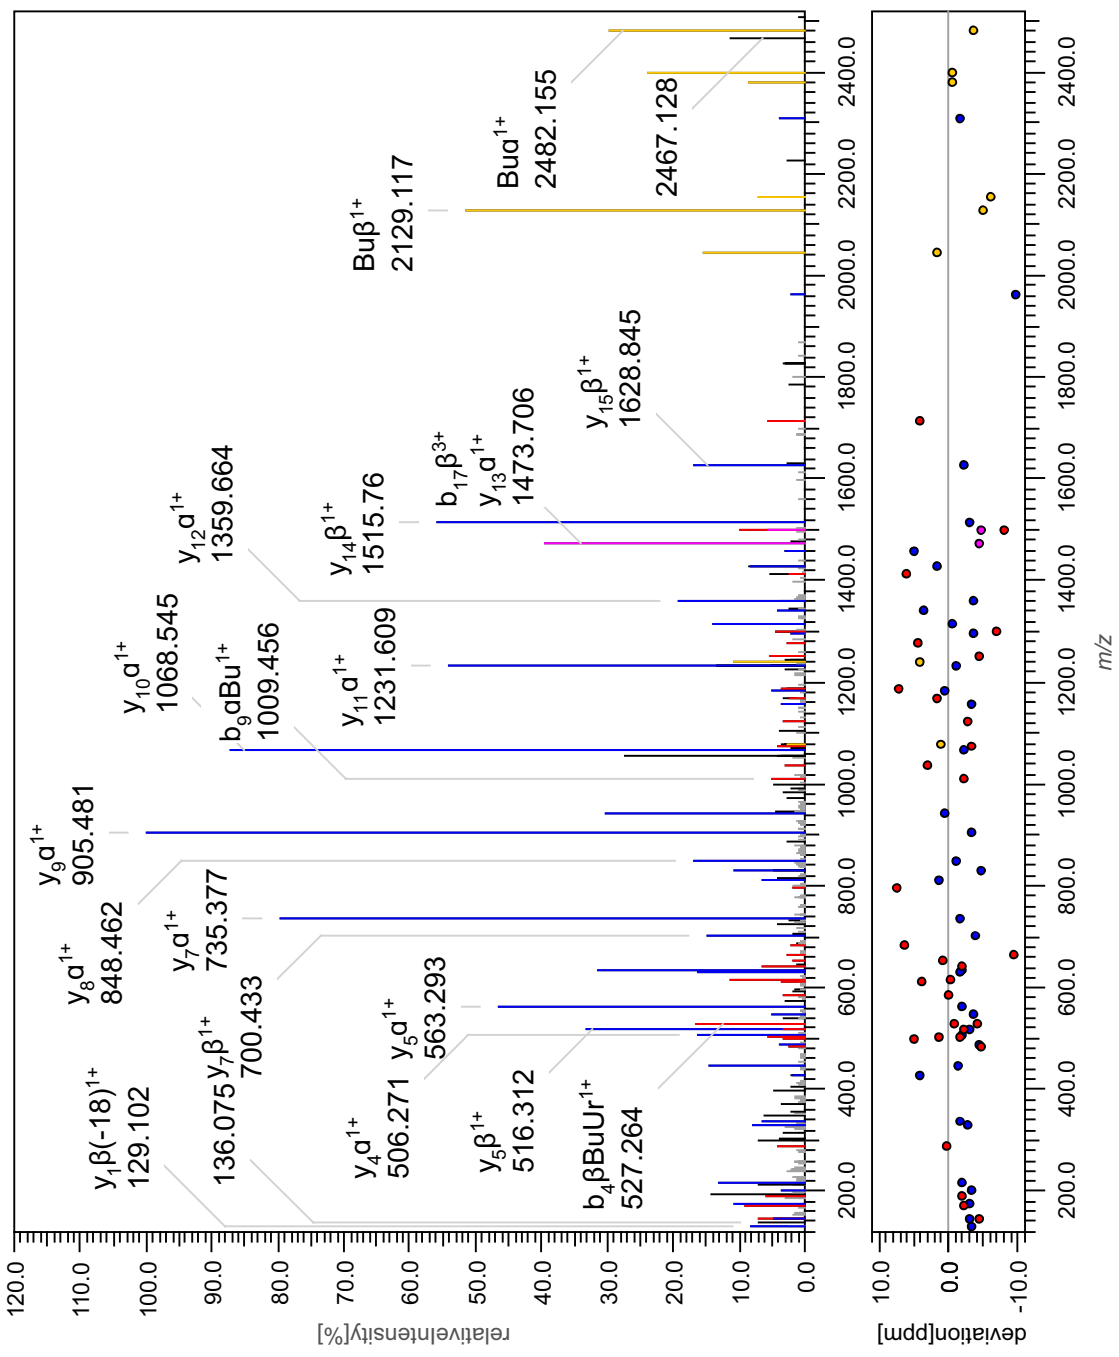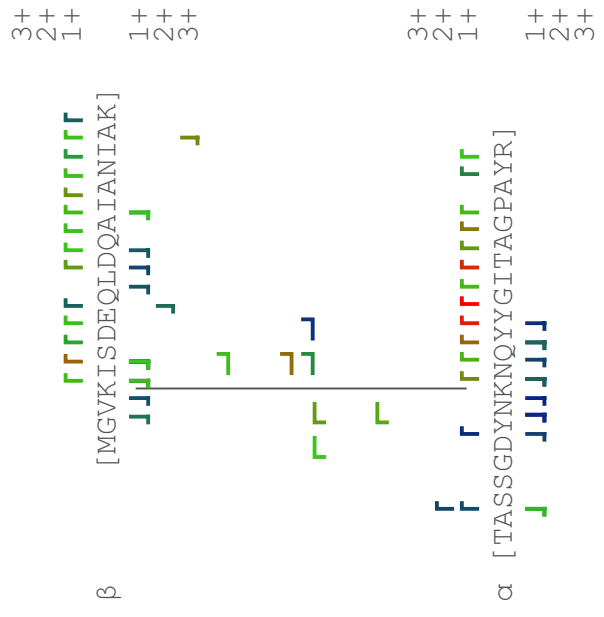

SurA K106  
OmpX K82

theor.Mass(M+H+):5452.581  
PrecursorMass(M+H+):5452.572  
Deviation:-1.55ppm  
m/z:1091.3203  
Charge:+5

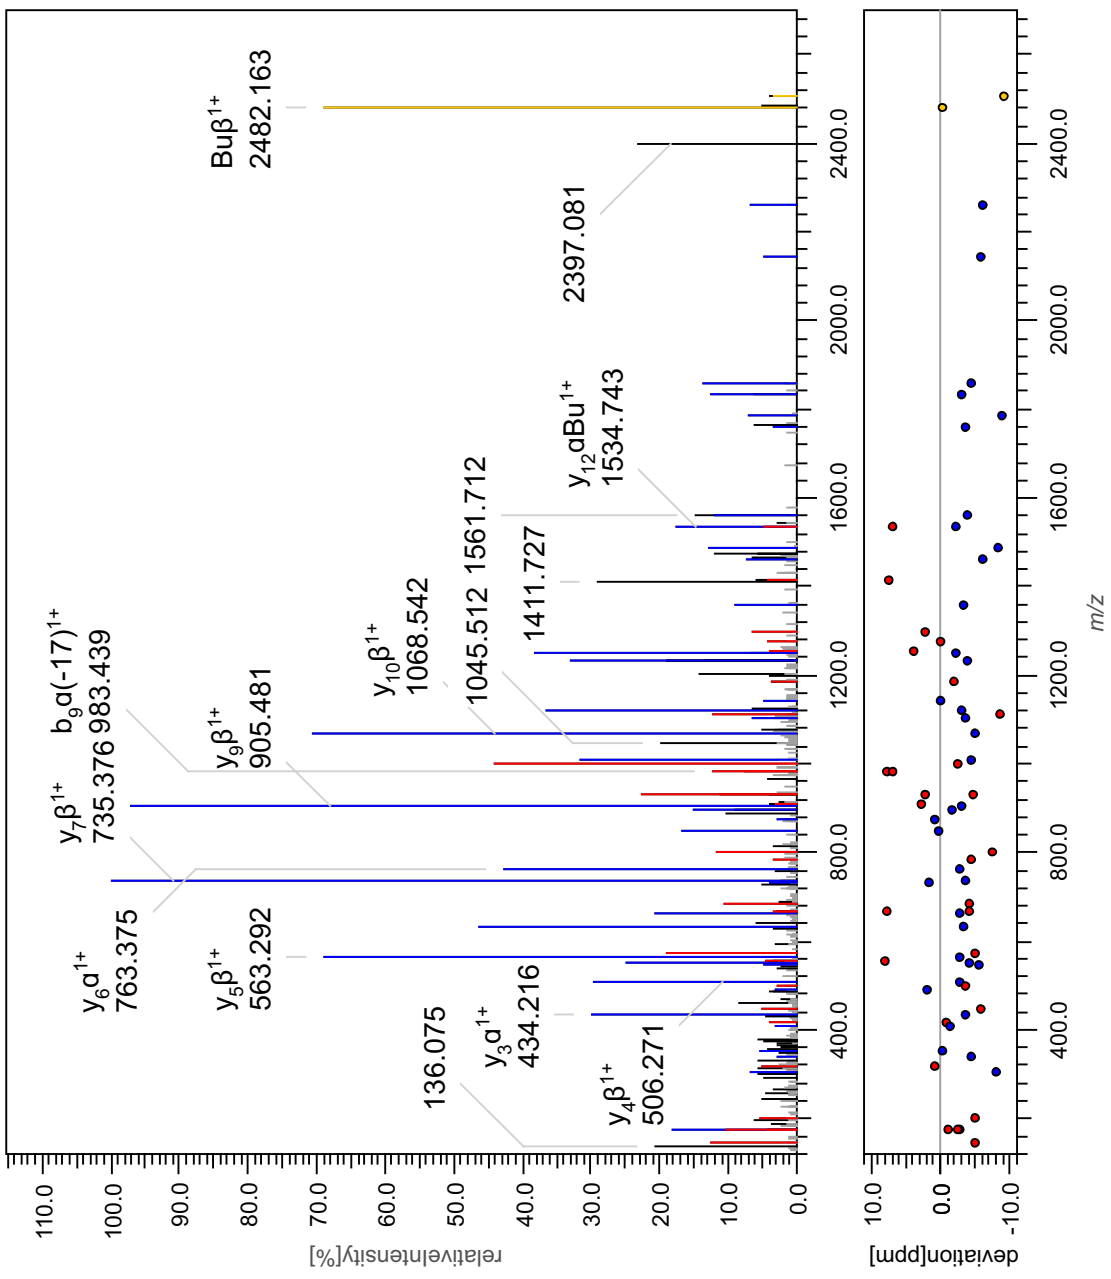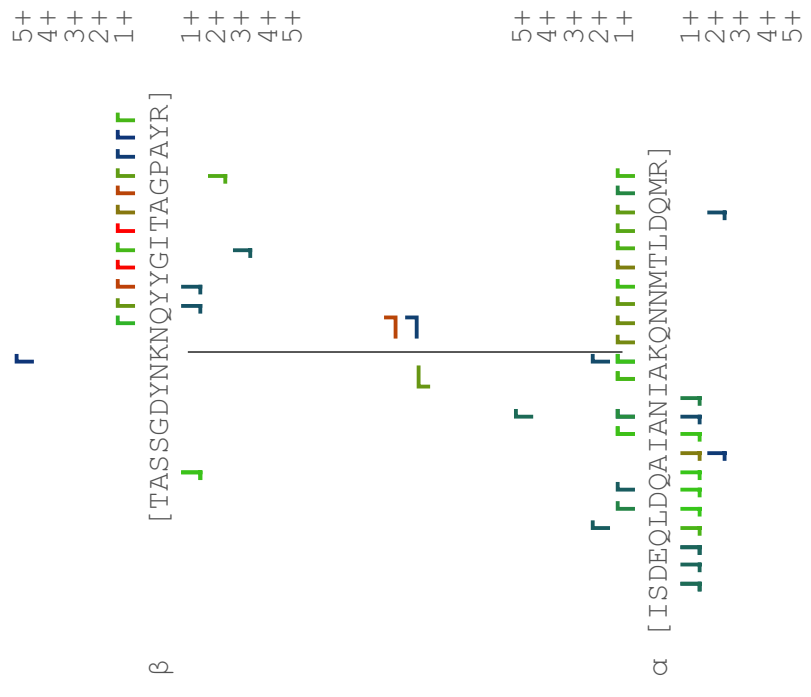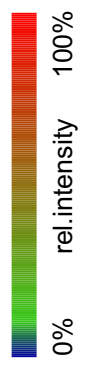

SurA K135  
OmpX K50

theor.Mass(M+H+):2385.242  
PrecursorMass(M+H+):2385.228  
Deviation-5.85ppm  
m/z:597.0624  
Charge:+4

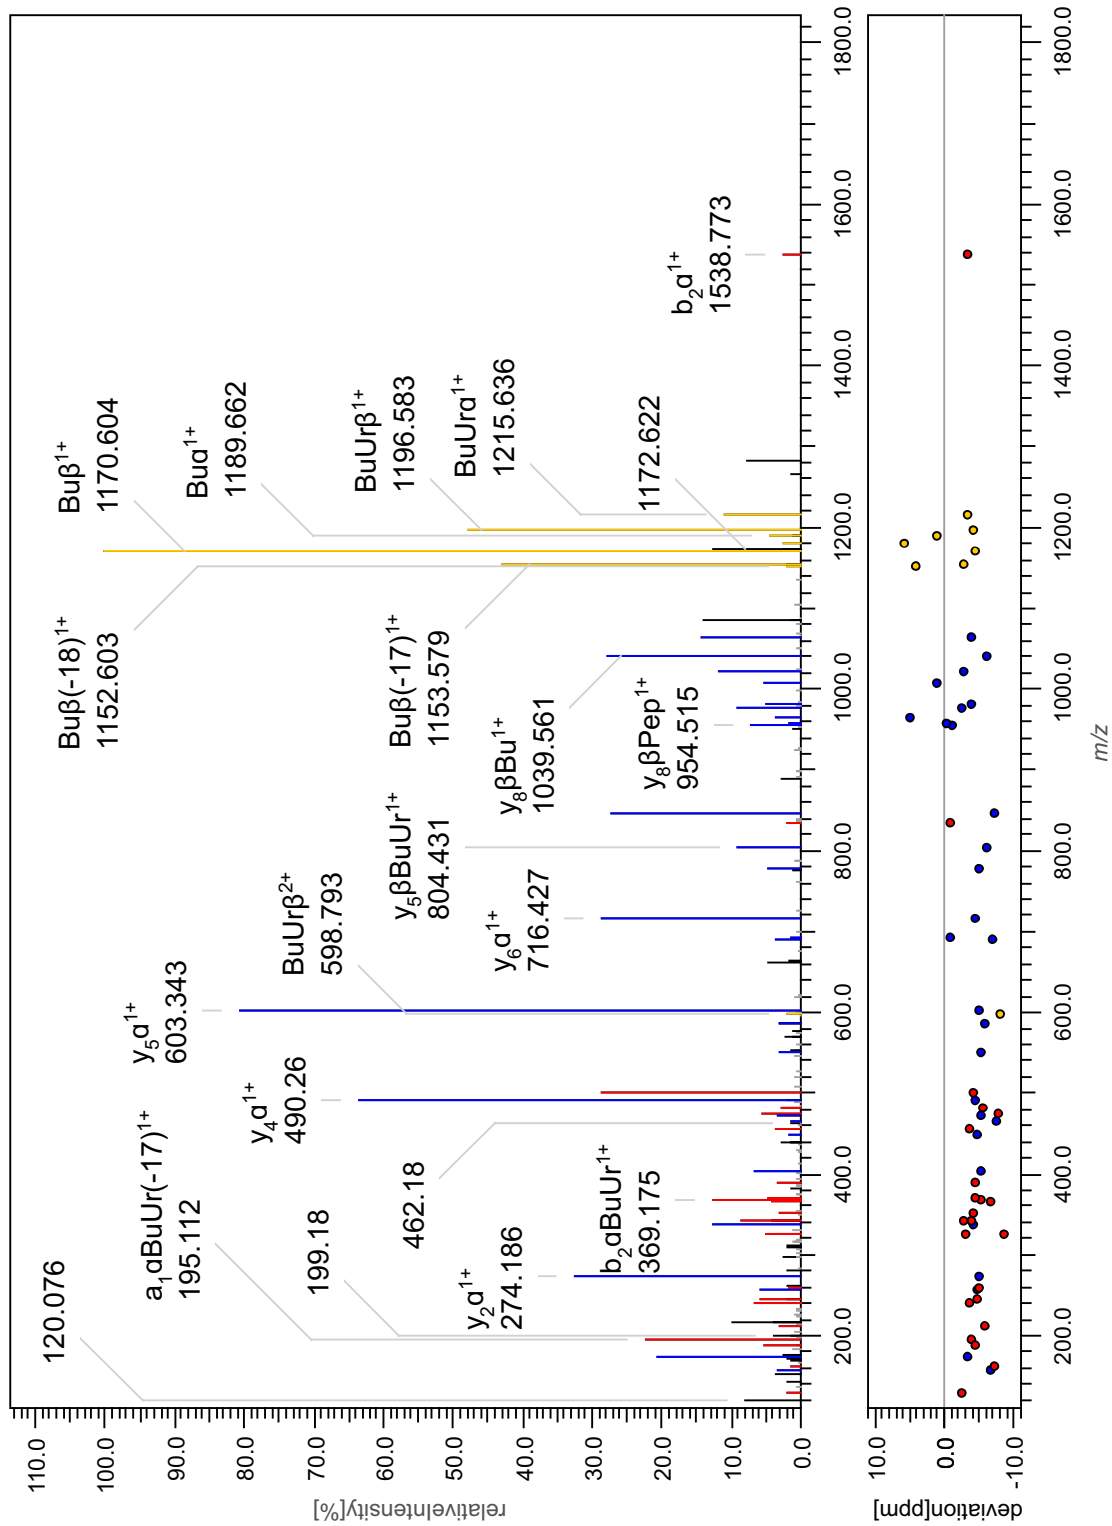



SurA K135  
OmpX K71

theor.Mass(M+H+):3691.816  
PrecursorMass(M+H+):3691.825  
Deviation2.43ppm  
m/z:923.7117  
Charge:+4

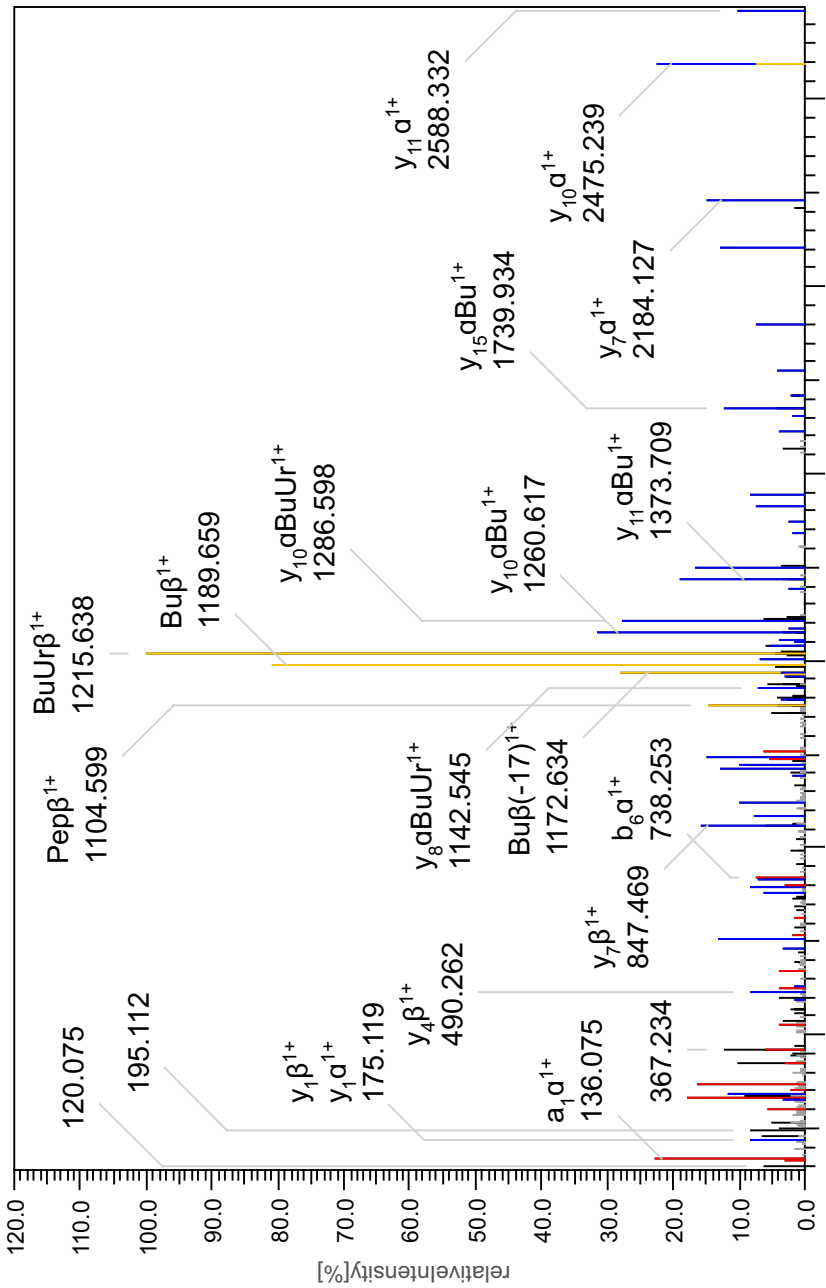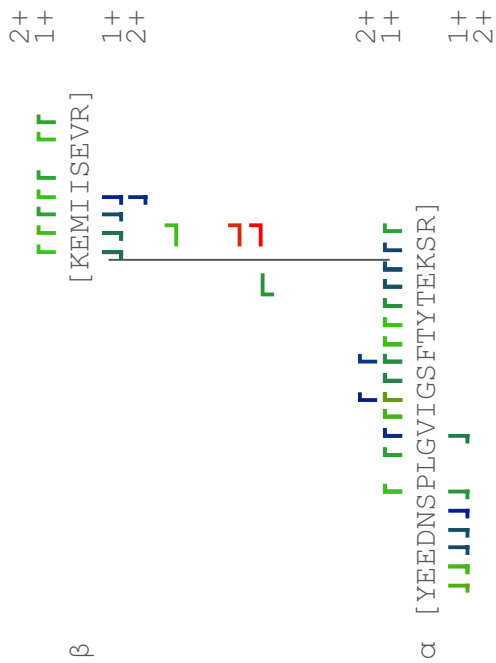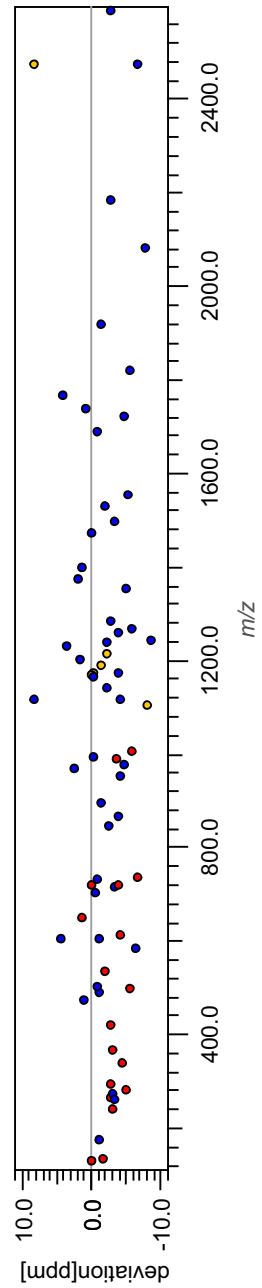

SurA K135  
OmpX K82

theor.Mass(M+H+): 3696.796  
 PrecursorMass(M+H+): 3696.787  
 Deviation: -2.37 ppm  
 m/z: 924.95233  
 Charge: +4

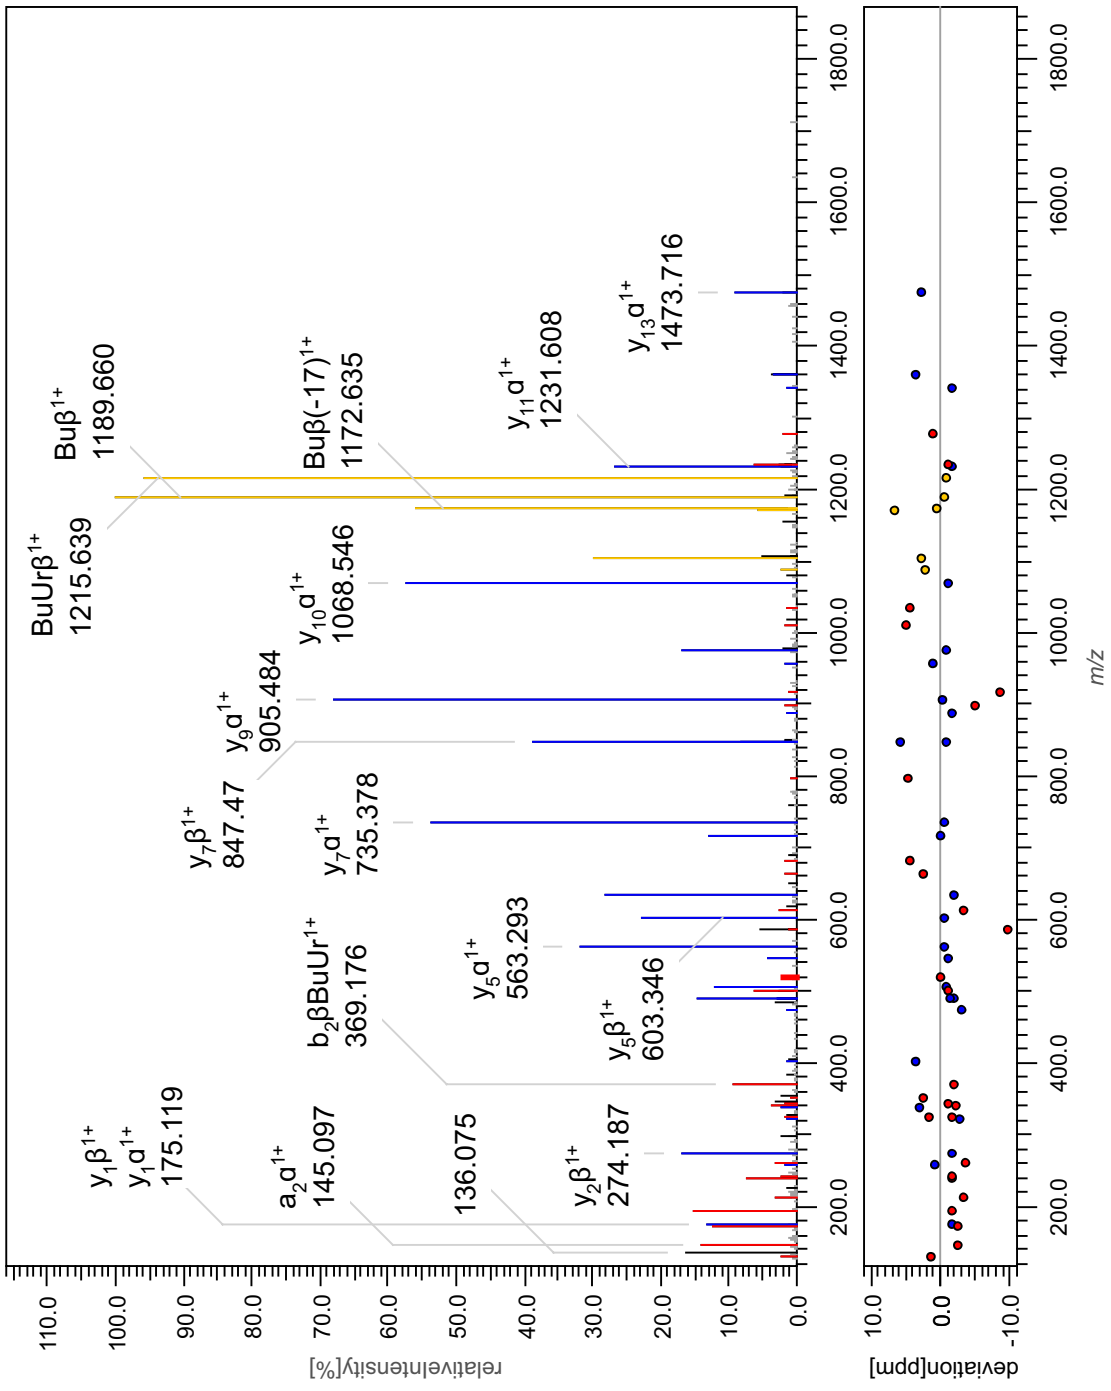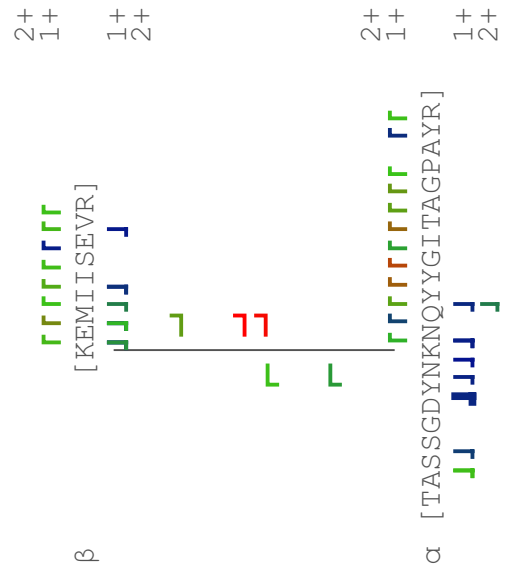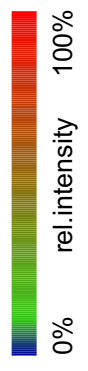

SurA K253  
OmpX K71

theor.Mass(M+H+):3541.781  
PrecursorMass(M+H+):3541.769  
Deviation-3.26ppm  
m/z:886.1978  
Charge:+4

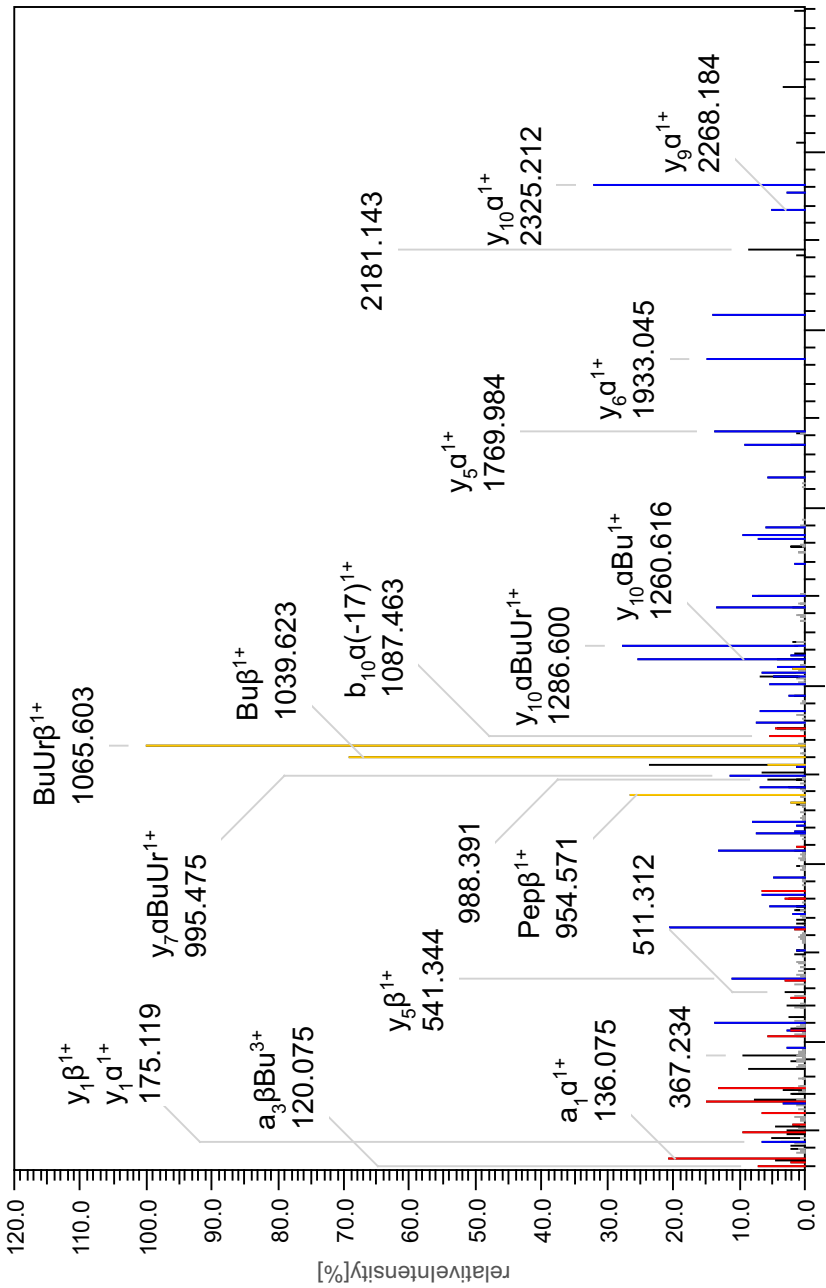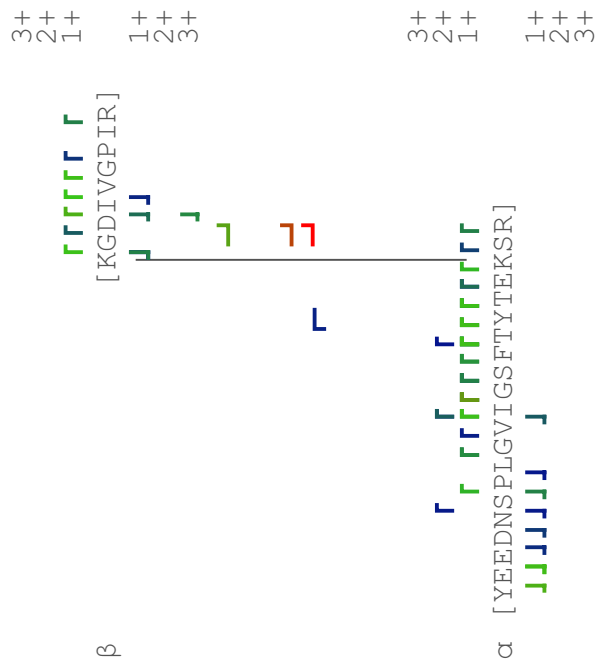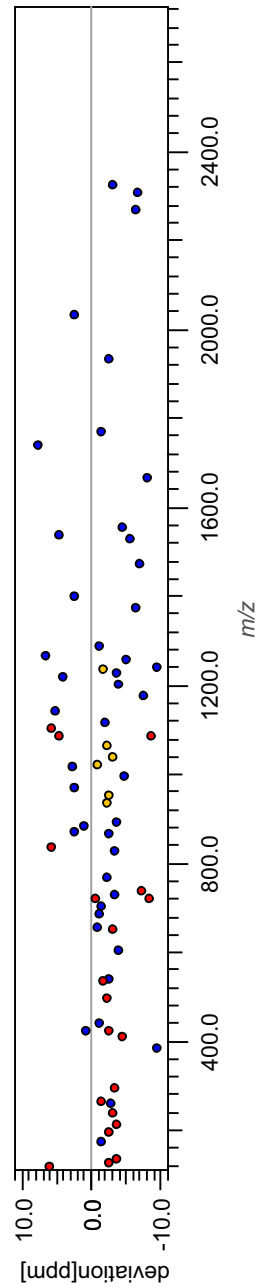

SurA K253  
OmpX K82

theor.Mass(M+H+):3546.761  
PrecursorMass(M+H+):3546.76  
Deviation-0.28ppm  
m/z:887.4455  
Charge:+4

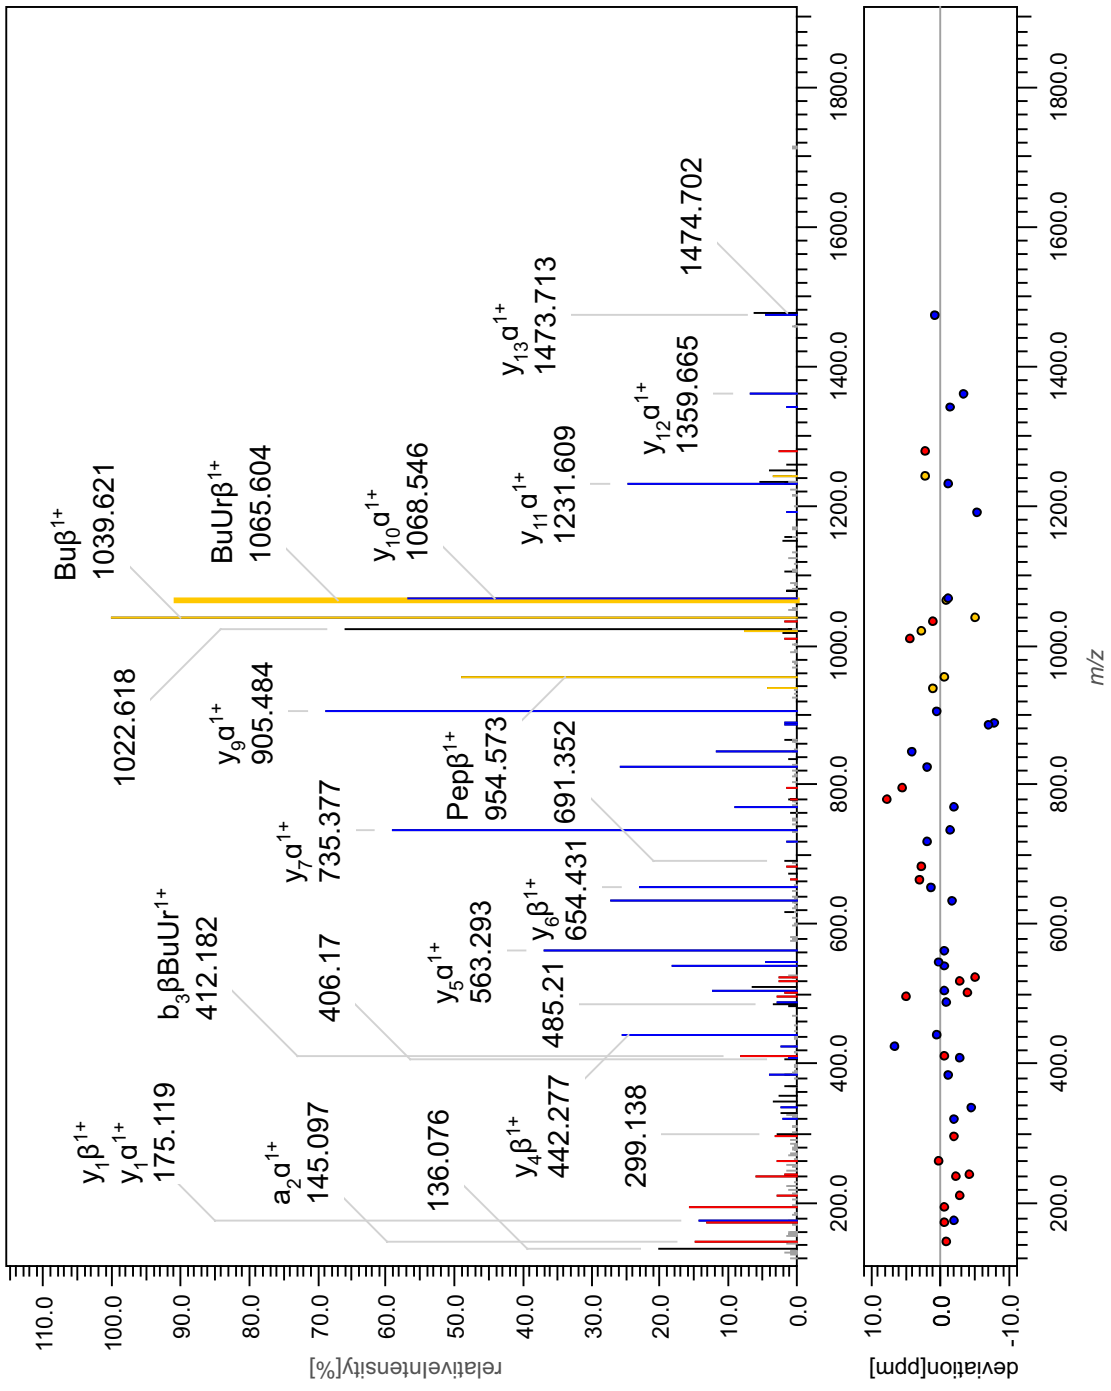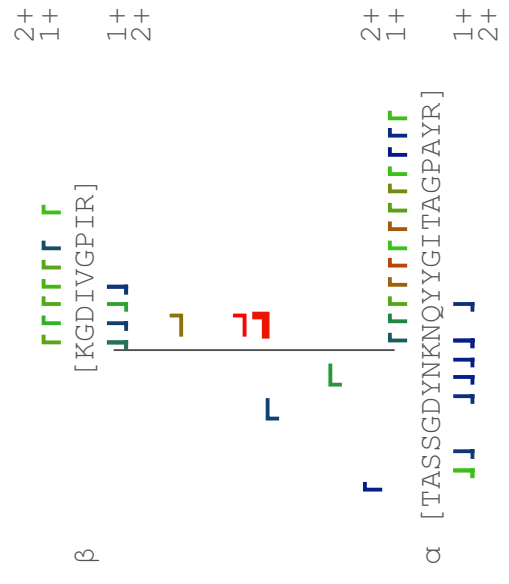

SurA K279  
OmpX K50

theor.Mass(M+H+):2807.426  
PrecursorMass(M+H+):2807.42  
Deviation:-1.98ppm  
m/z:702.6105  
Charge:+4

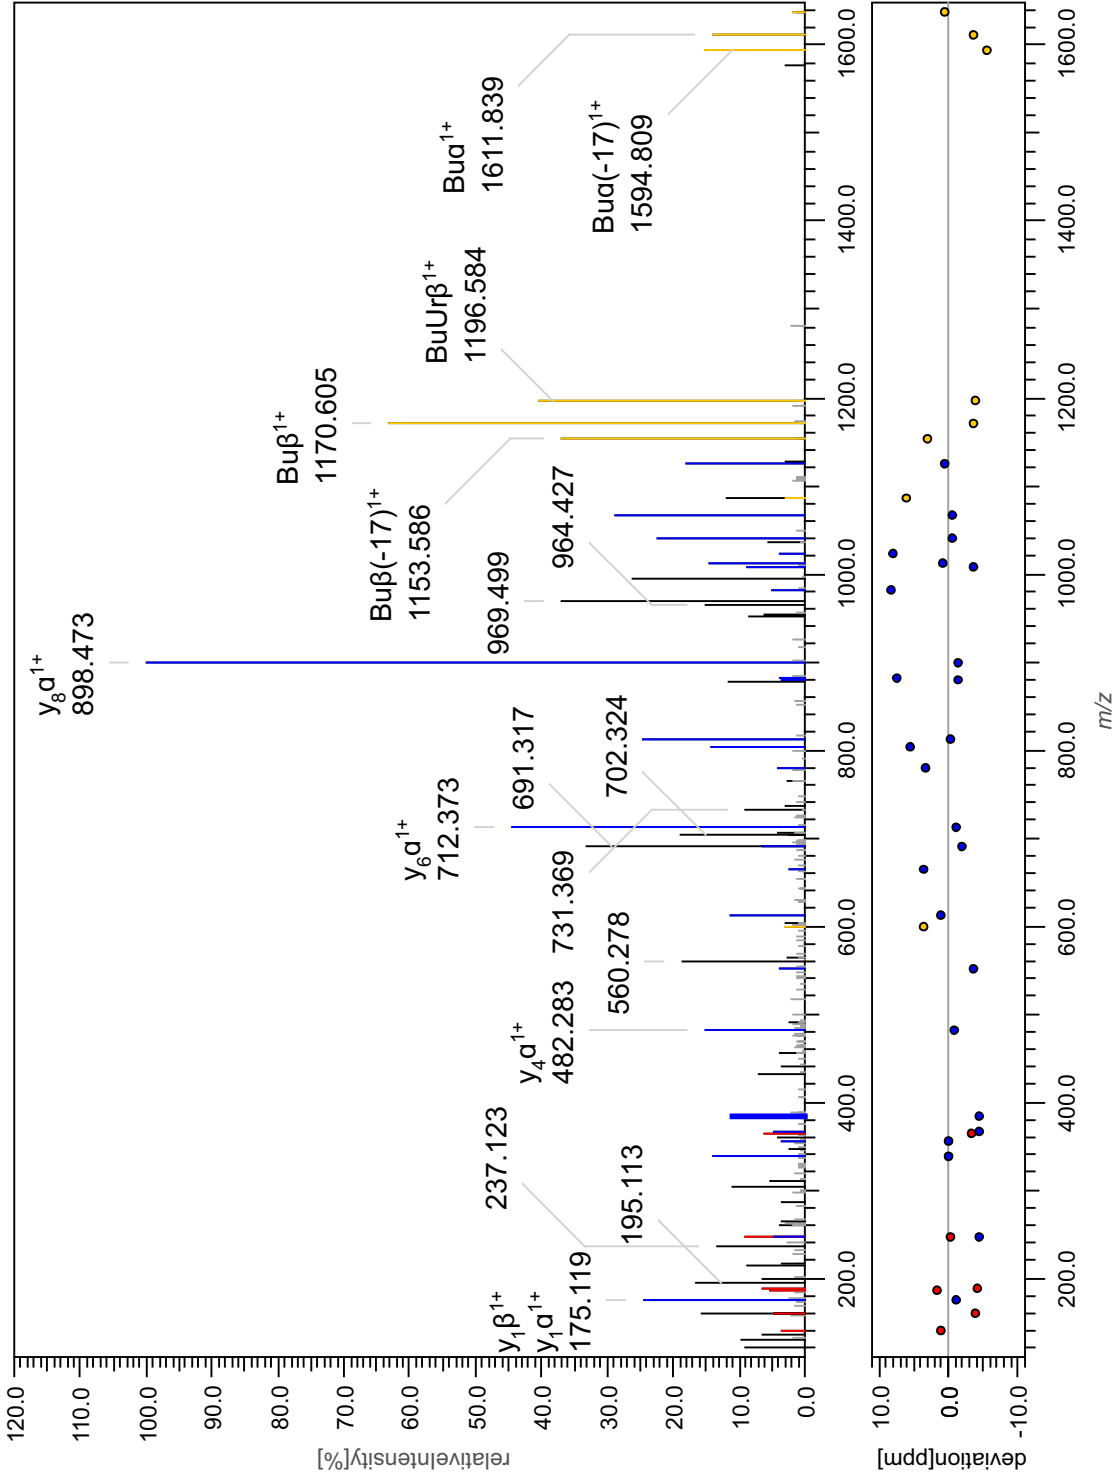

# SurA K279 OmpX K82

theor.Mass(M+H<sup>+</sup>): 4118.979  
 PrecursorMass(M+H<sup>+</sup>): 4118.957  
 Deviation: -5.49ppm  
 m/z: 824.59735  
 Charge: +5

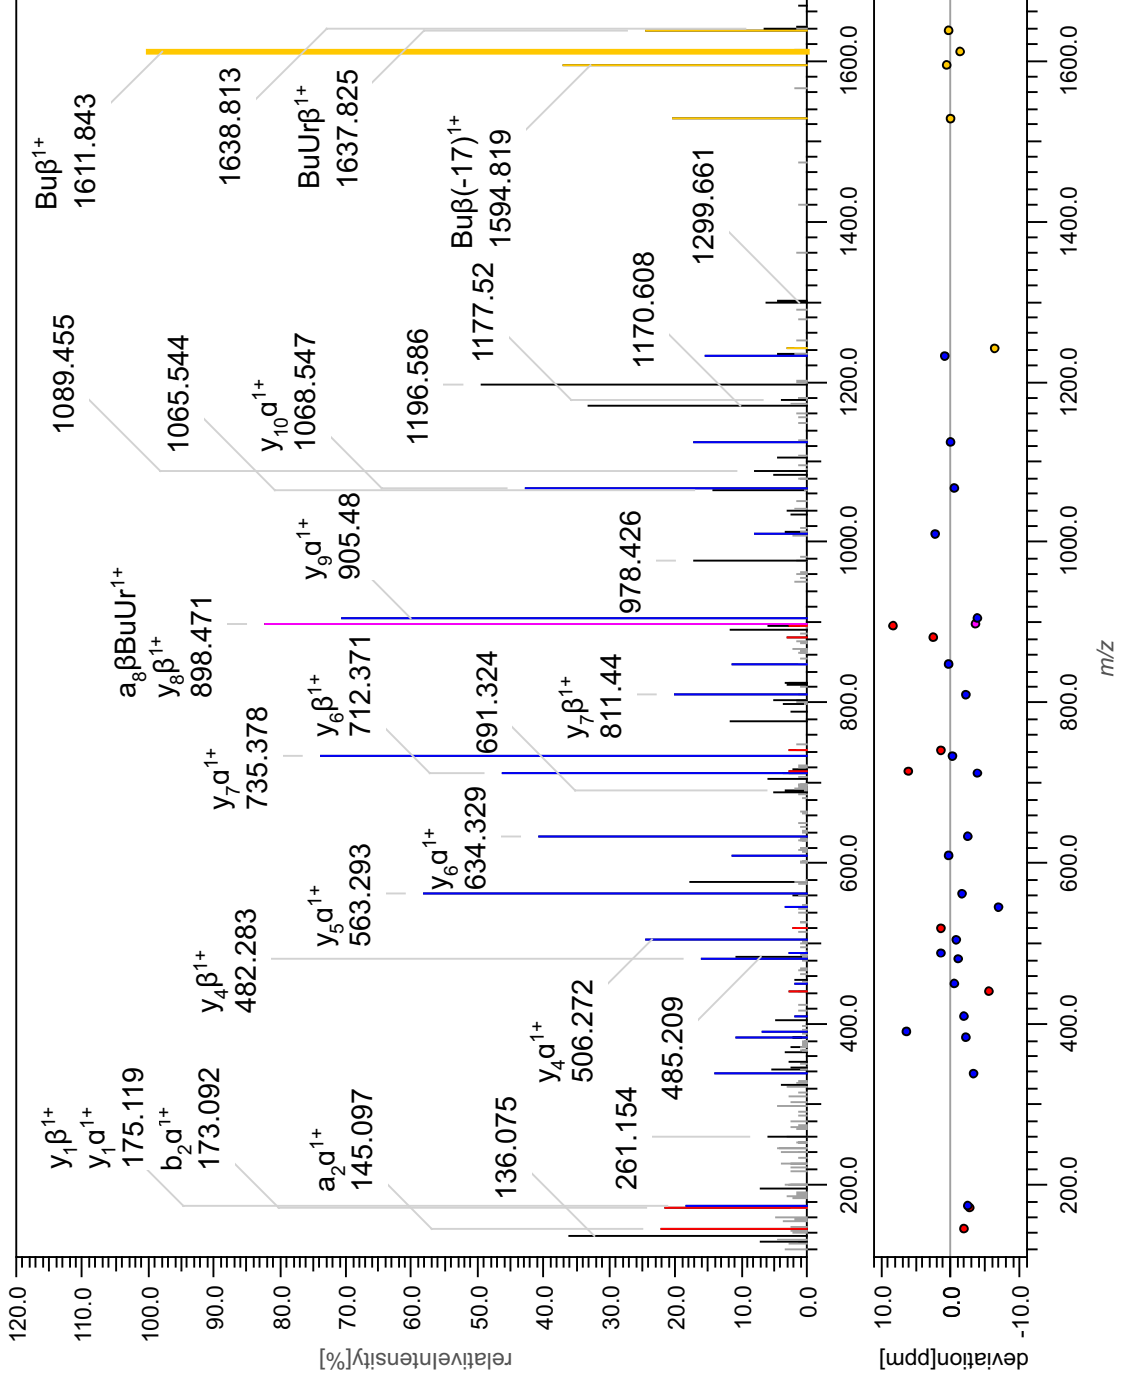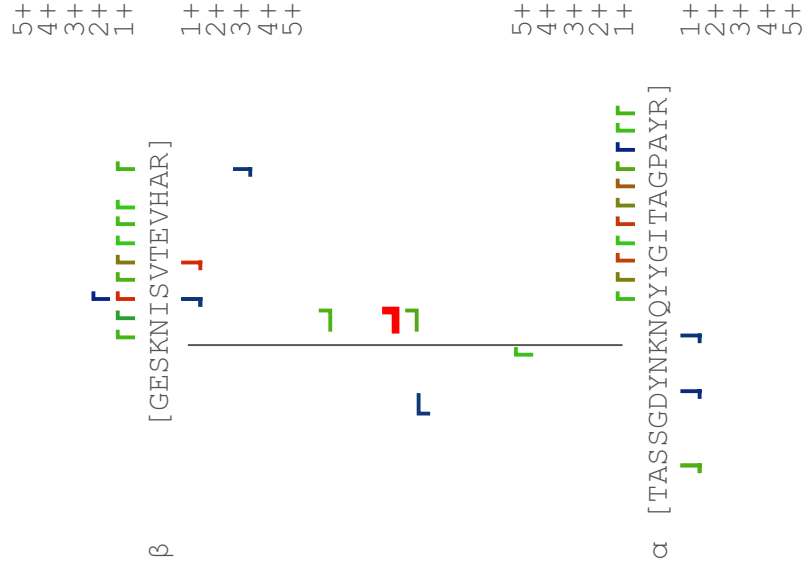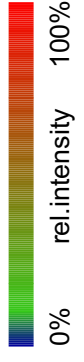

SurA K294  
OmpX K50

theor.Mass(M+H+):3129.634  
PrecursorMass(M+H+):3129.618  
Deviation-4.93ppm  
m/z:783.16  
Charge:+4

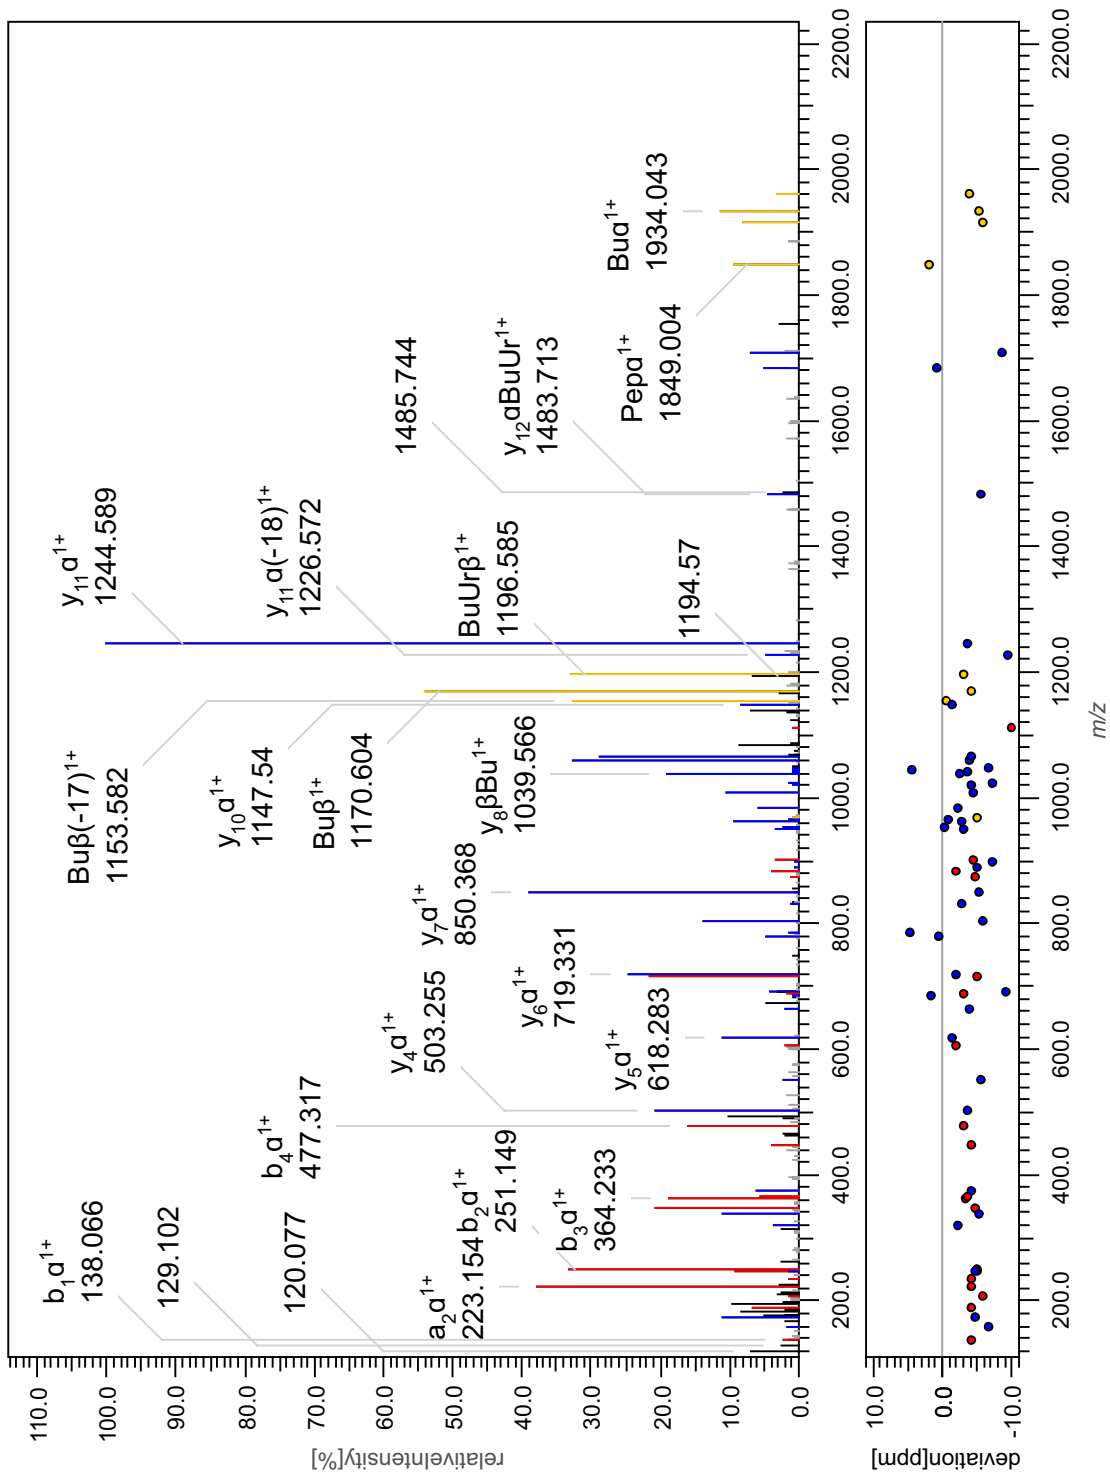

SurA K294  
OmpX K71

theor.Mass(M+H+):4755.372  
PrecursorMass(M+H+):4755.365  
Deviation:-1.45ppm  
m/z:951.8789  
Charge:+5

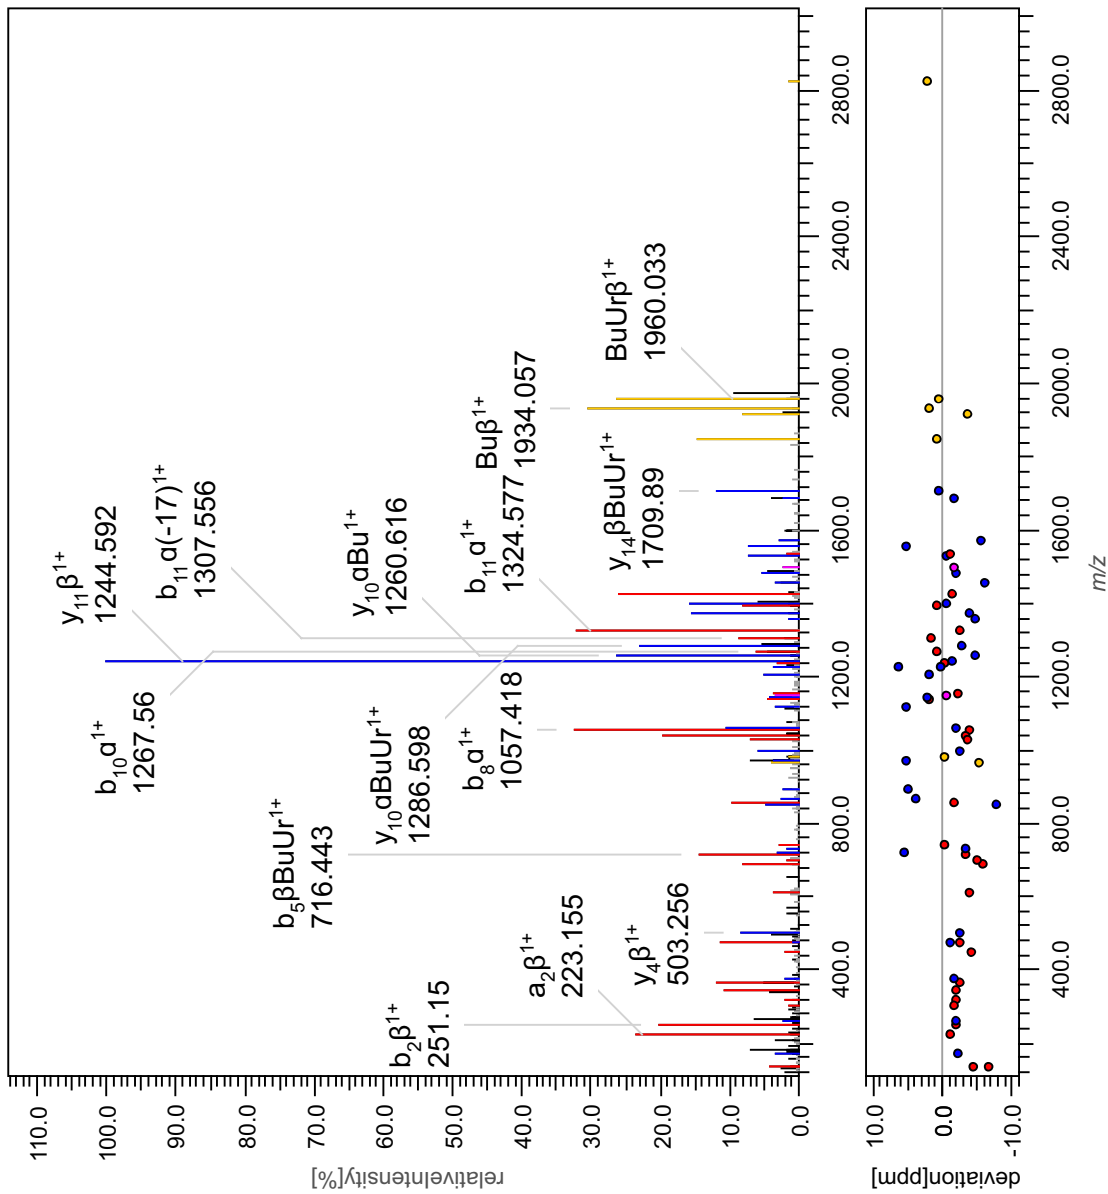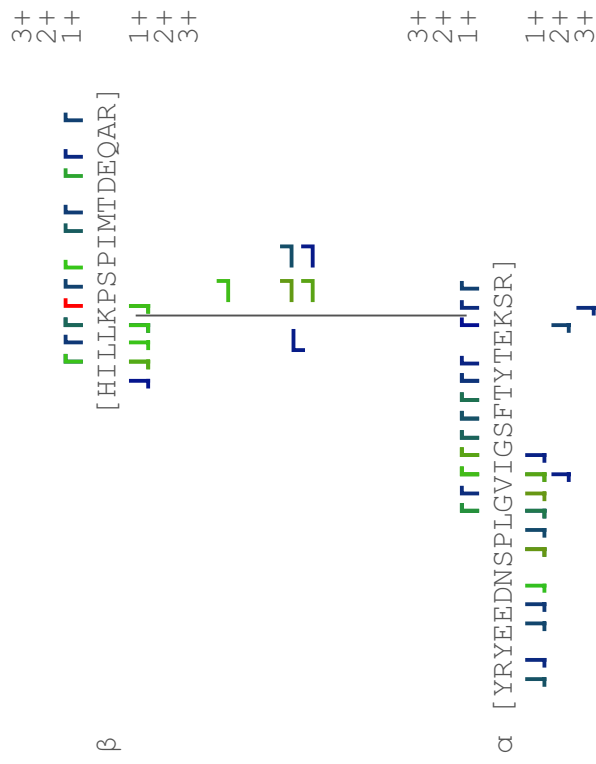



SurA K294  
OmpX K82

theor.Mass(M+H+):4441.188  
PrecursorMass(M+H+):4441.17  
Deviation-4.09ppm  
m/z:889.0398  
Charge:+5

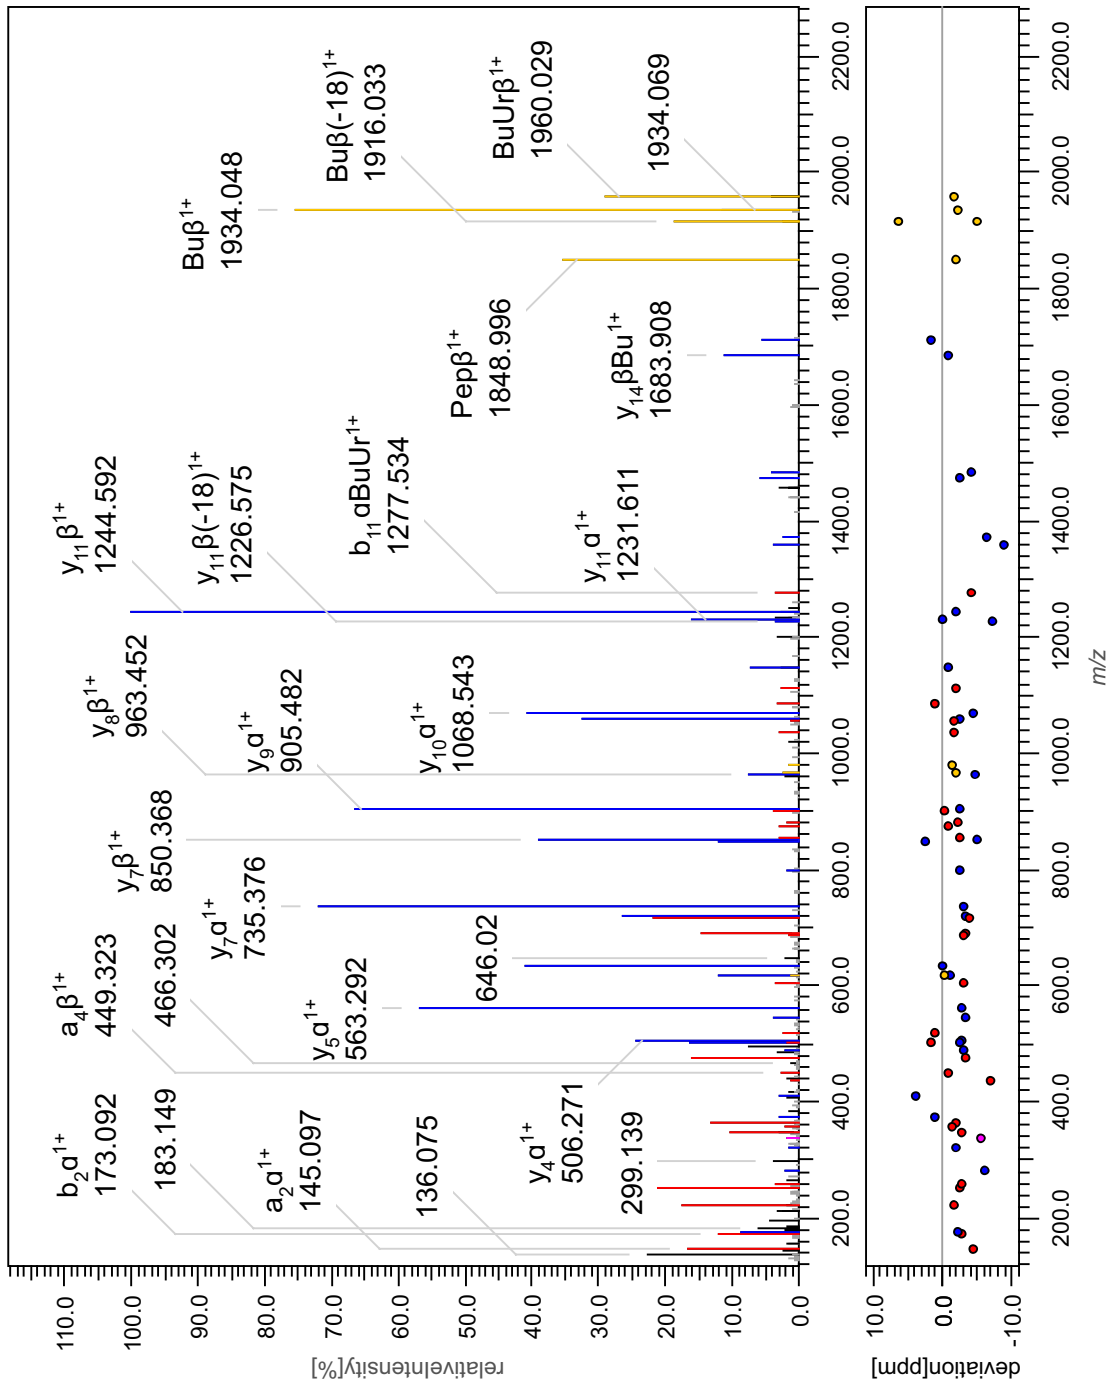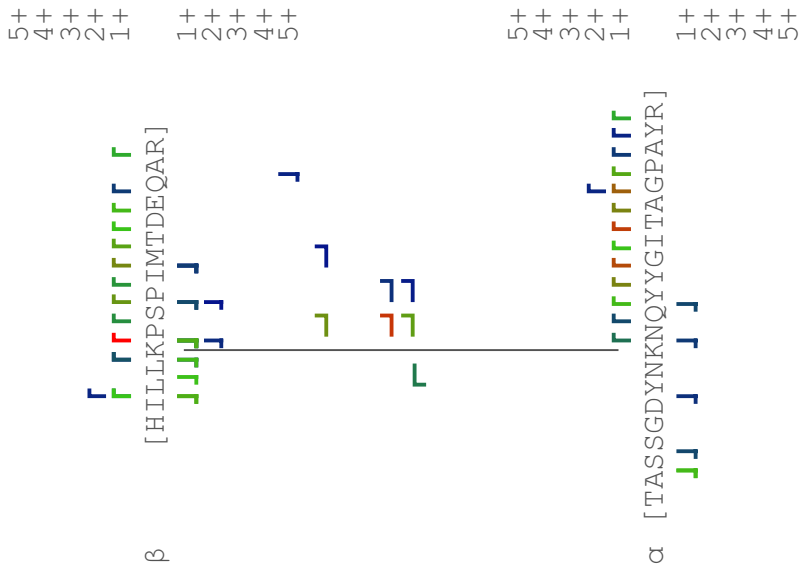

SurA K307  
OmpX K50

theor.Mass(M+H+):2508.364  
PrecursorMass(M+H+):2508.352  
Deviation-4.93ppm  
m/z:627.84344  
Charge:+4

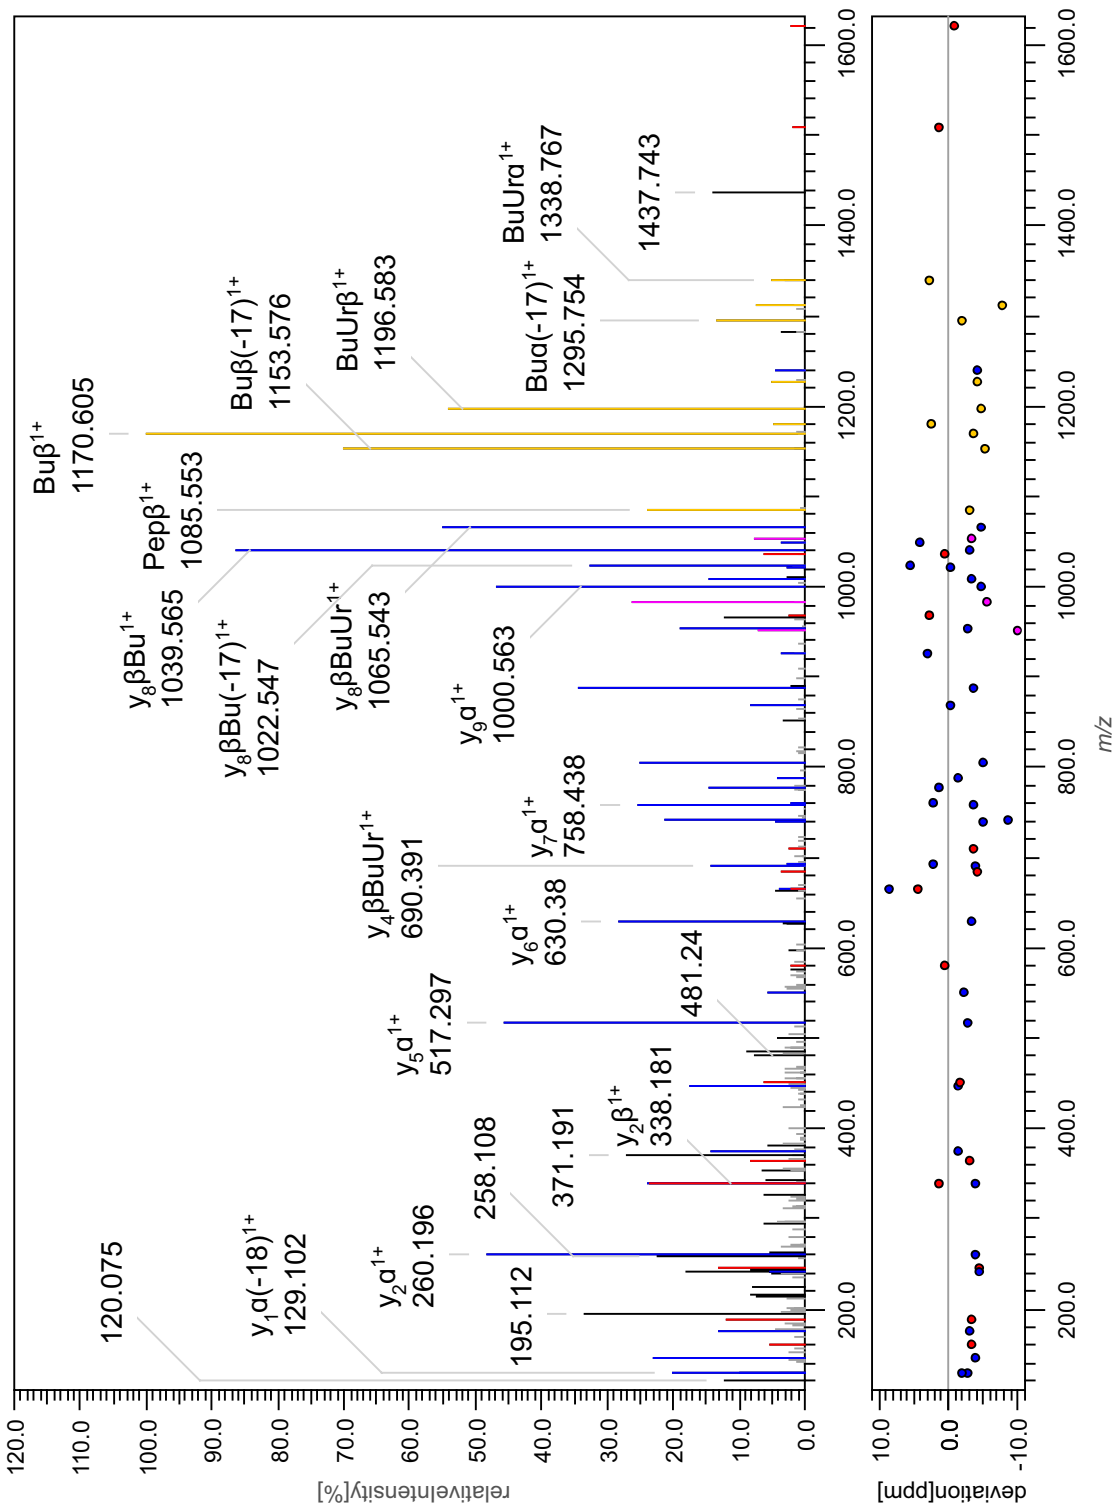

SurA K307  
OmpX K82

theor.Mass(M+H+):3819.919  
PrecursorMass(M+H+):3819.91  
Deviation-2.25ppm  
m/z:955.733  
Charge:+4

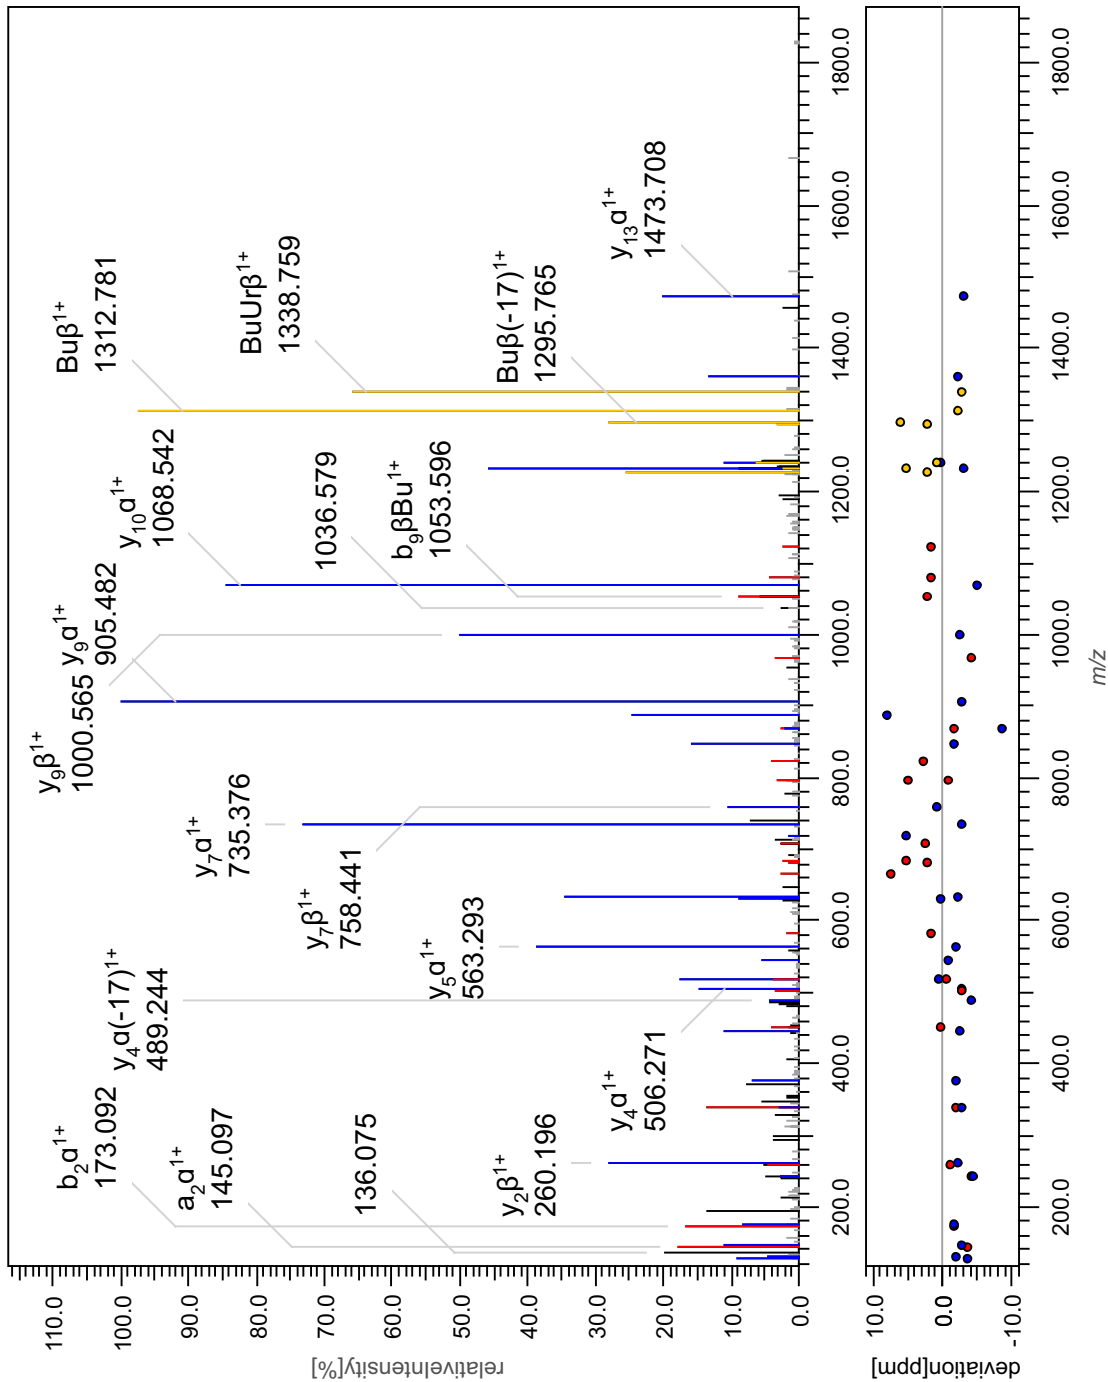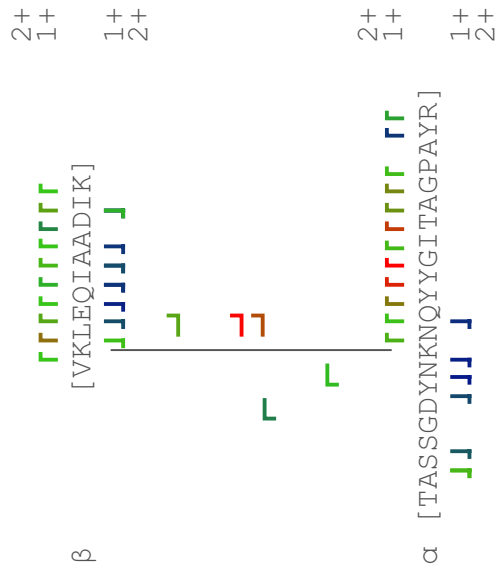

# SurA K316 OmpX K82

3+  
2+  
1+

$\beta$  [LEQIAADIKSGK]

JJJJ  
JJJJ  
JJJJ

3+  
2+  
1+  
1+  
2+  
3+

$\alpha$  [TASSGDYKNQYYGITAGPAYR]

JJJJJJJJJJJ  
JJJJJJJJJJ  
JJJJJJJJJJ

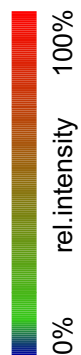

theor.Mass(M+H+): 3864.904  
PrecursorMass(M+H+): 3864.89  
Deviation: -3.71 ppm  
m/z: 966.97784  
Charge: +4

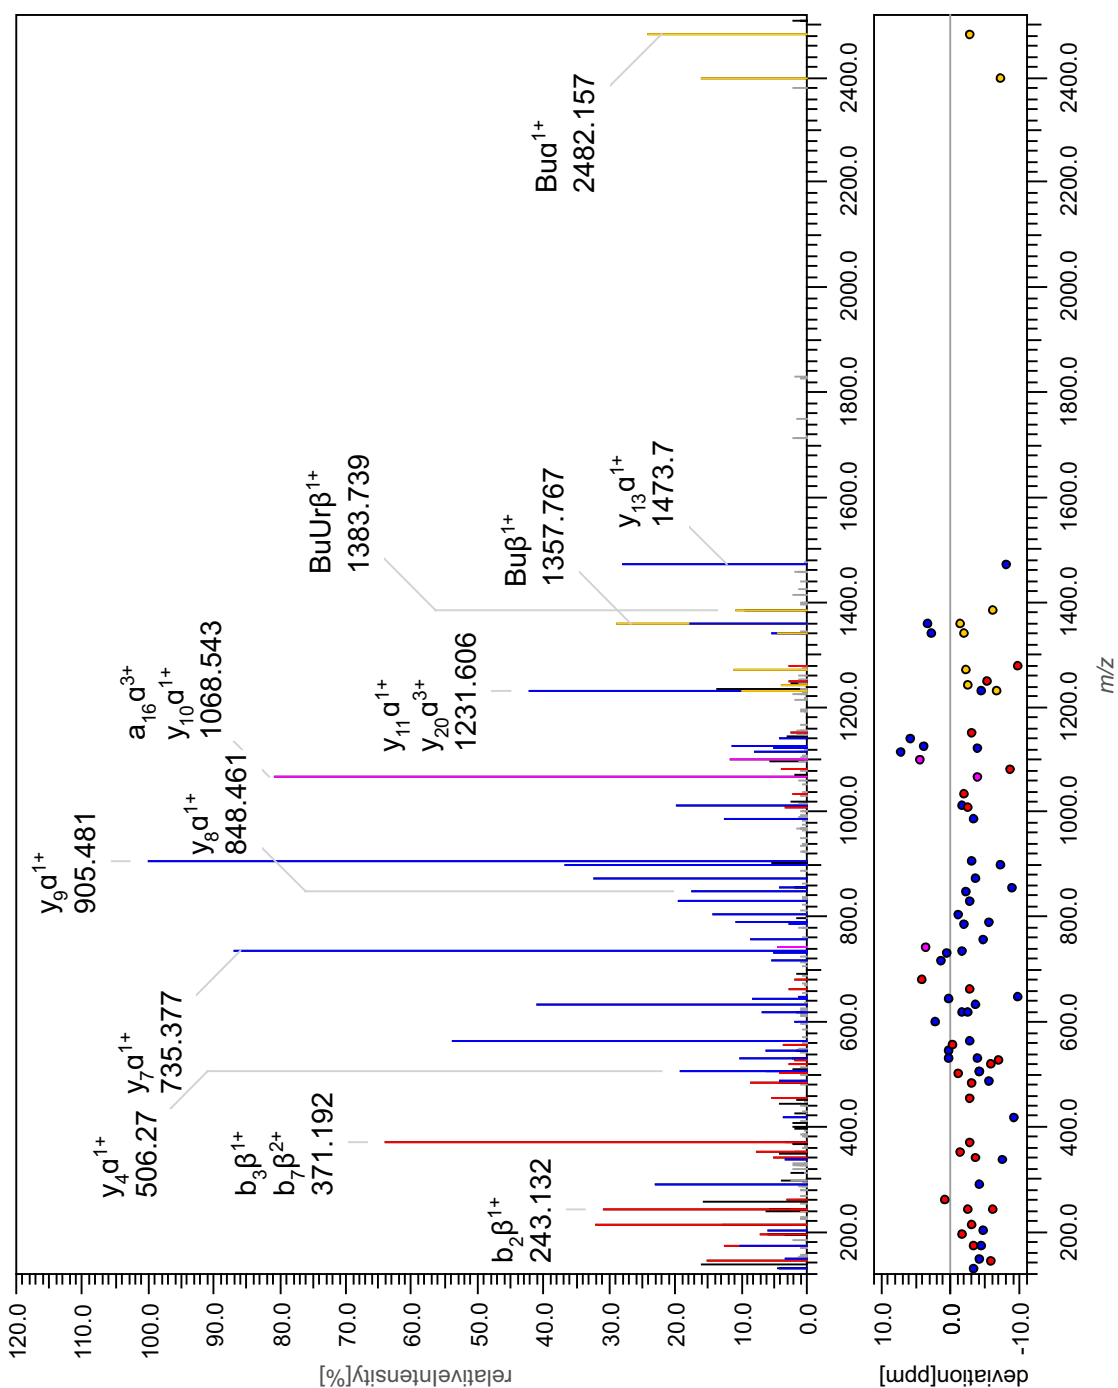

SurA K389  
OmpX K50

theor.Mass(M+H+):2370.187  
PrecursorMass(M+H+):2370.178  
Deviation:-3.76ppm  
m/z:790.7309  
Charge:+3

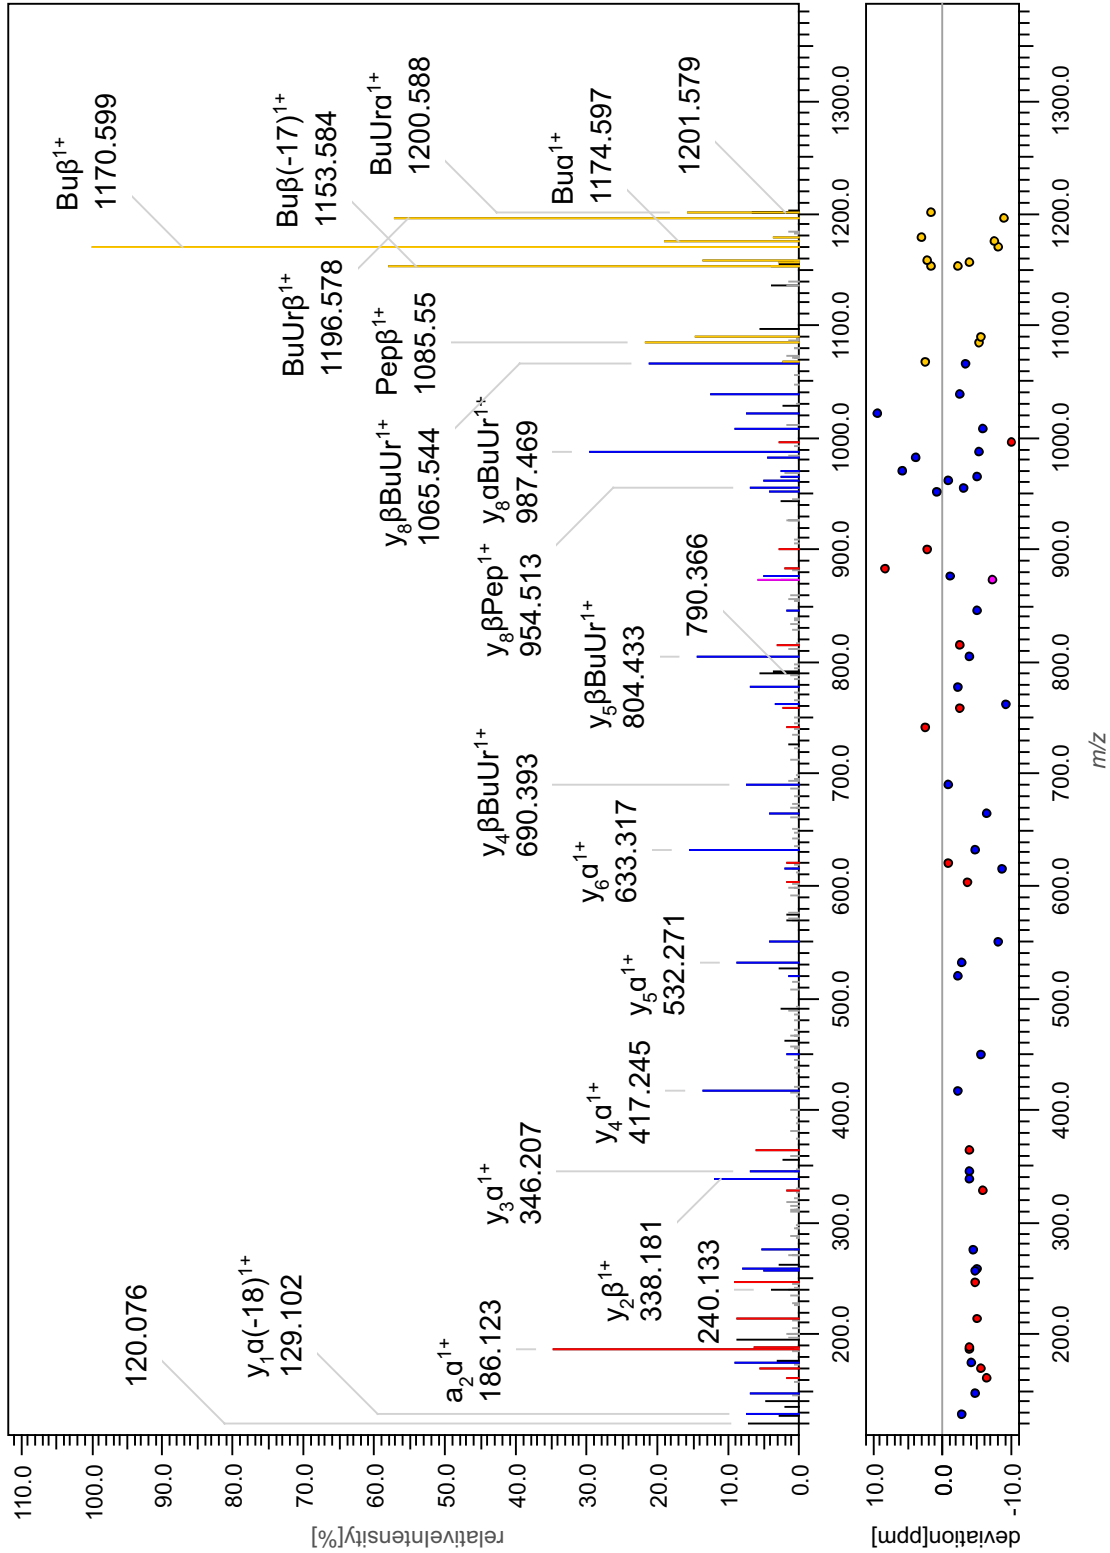

SurA K389  
OmpX K71

theor.Mass(M+H+):3676.761  
PrecursorMass(M+H+):3676.75  
Deviation-3.14ppm  
m/z:919.9429  
Charge:+4

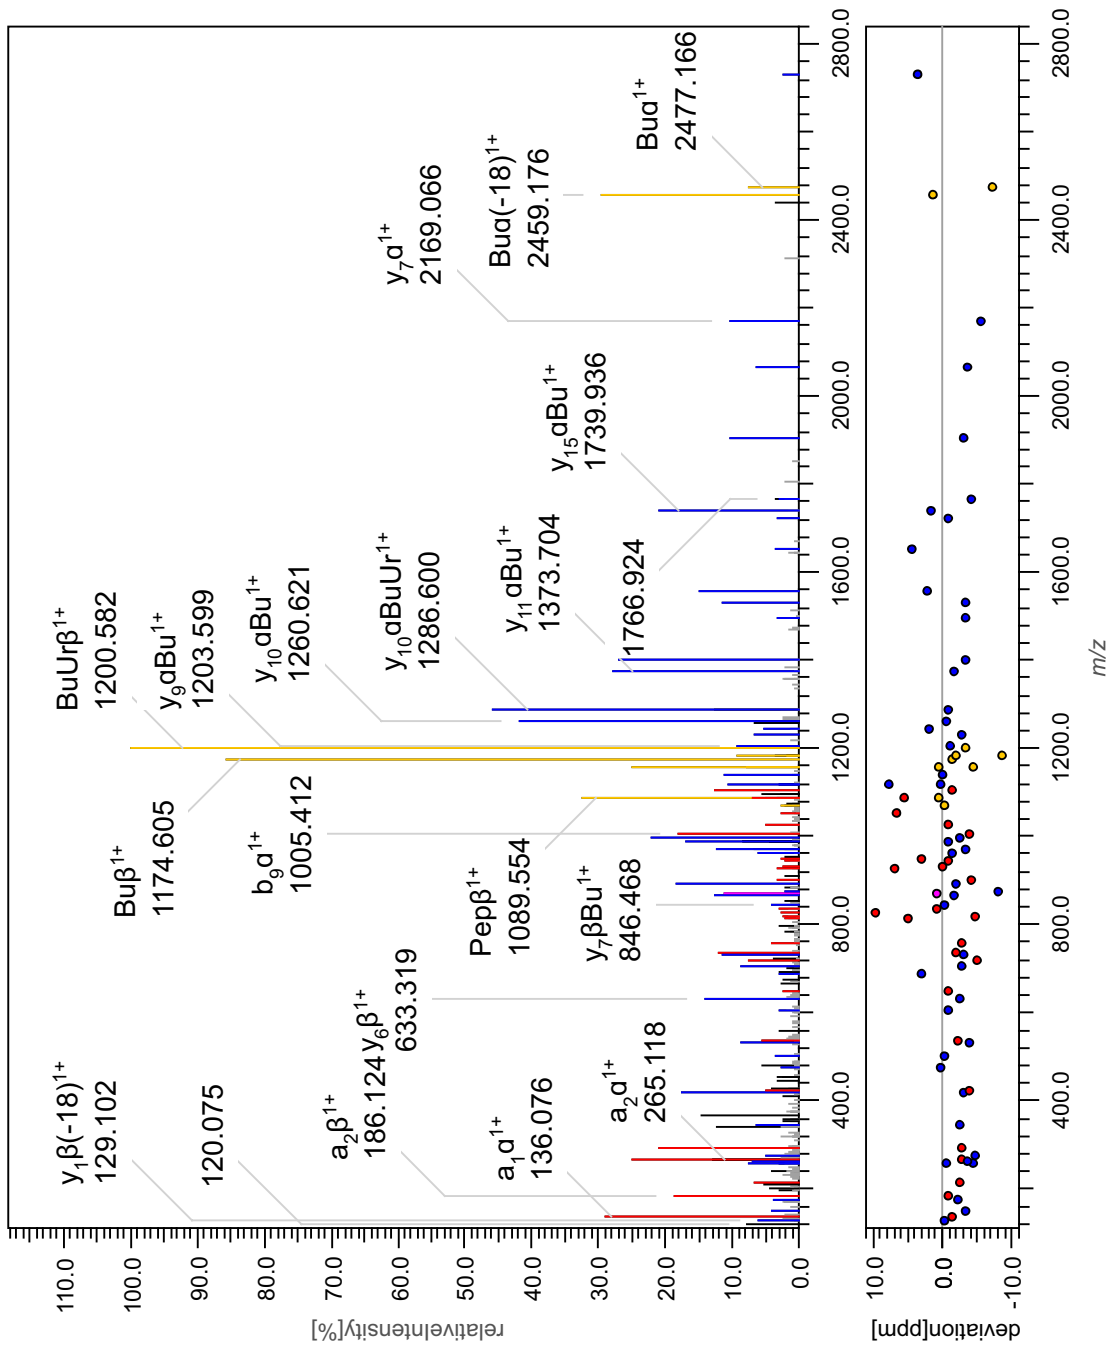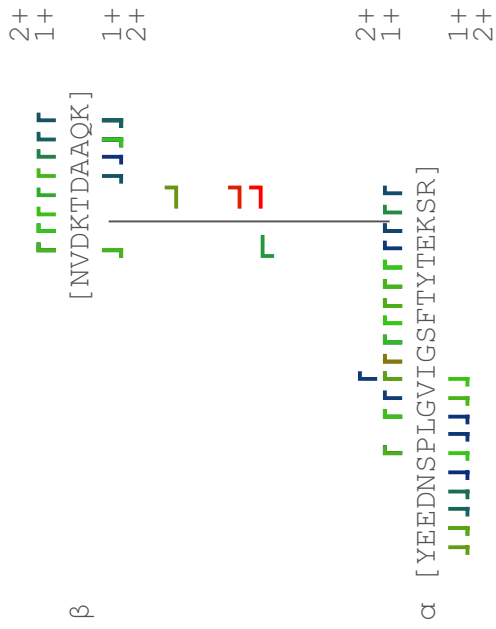

SurA K389  
OmpX K82

theor.Mass(M+H+):2475.382  
PrecursorMass(M+H+):2475.377  
Deviation:-1.92ppm  
m/z:619.5997  
Charge:+4

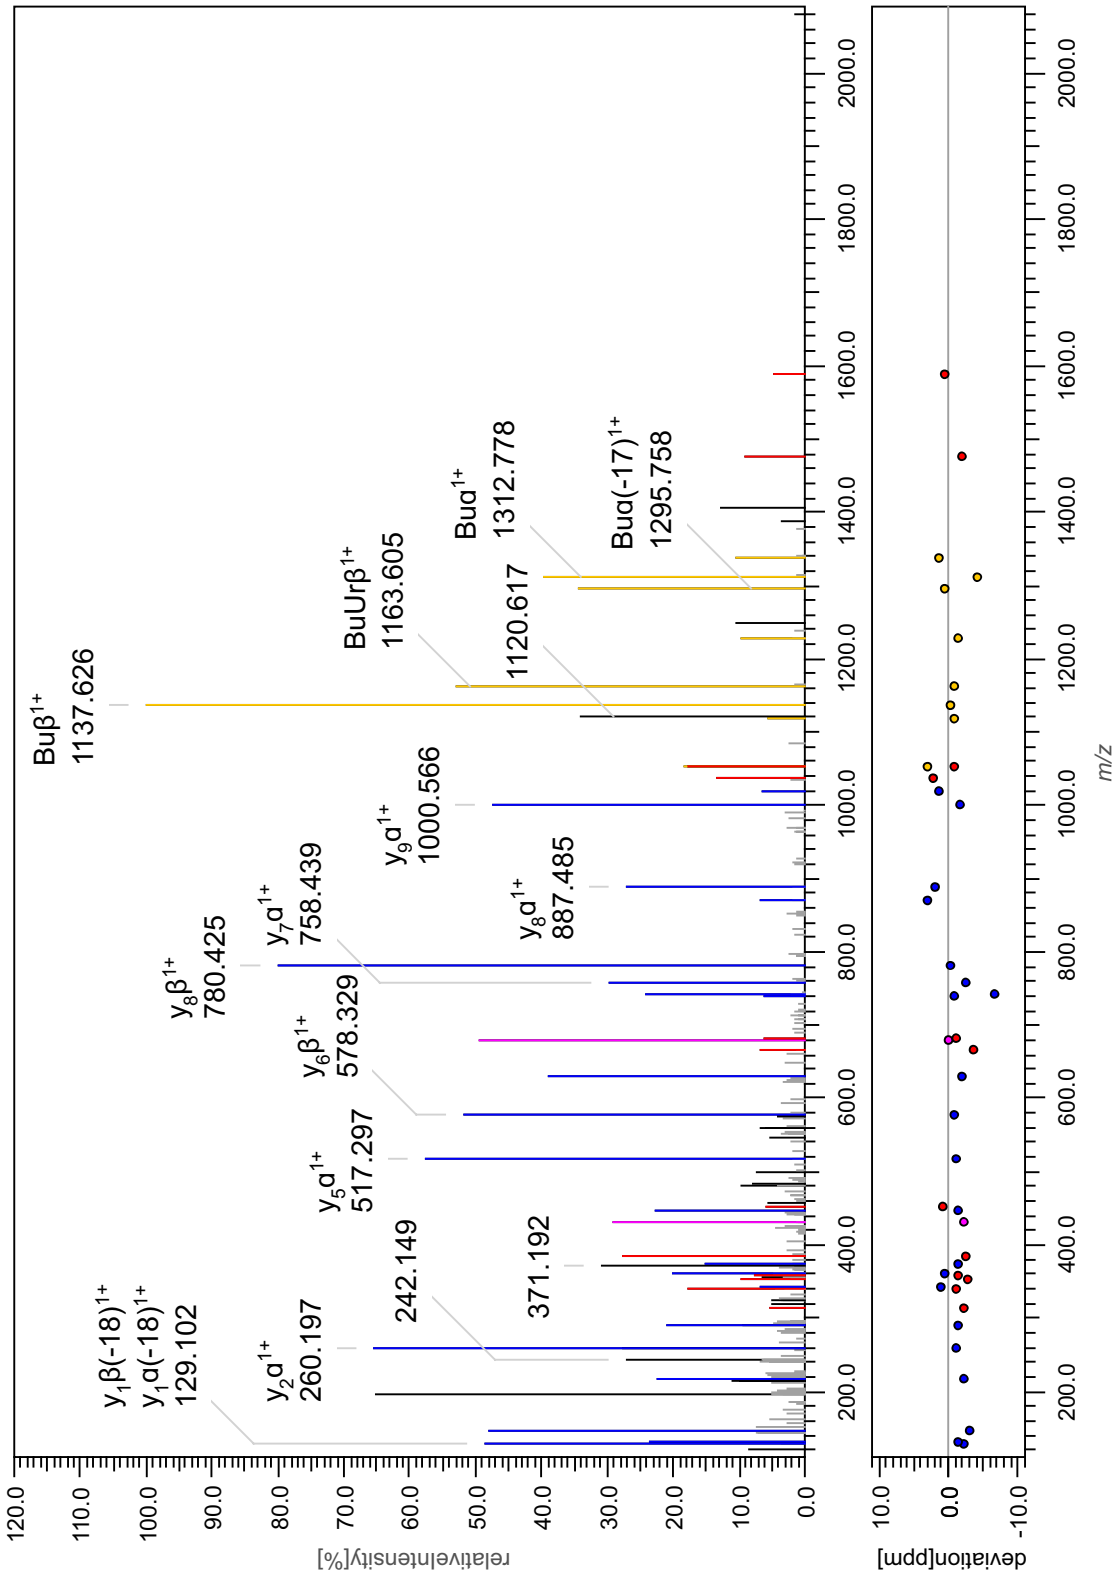

SurA K395  
OmpX K50

theor.Mass(M+H+):2185.082  
PrecursorMass(M+H+):2185.075  
Deviation:-3.07ppm  
m/z:729.0299  
Charge:+3

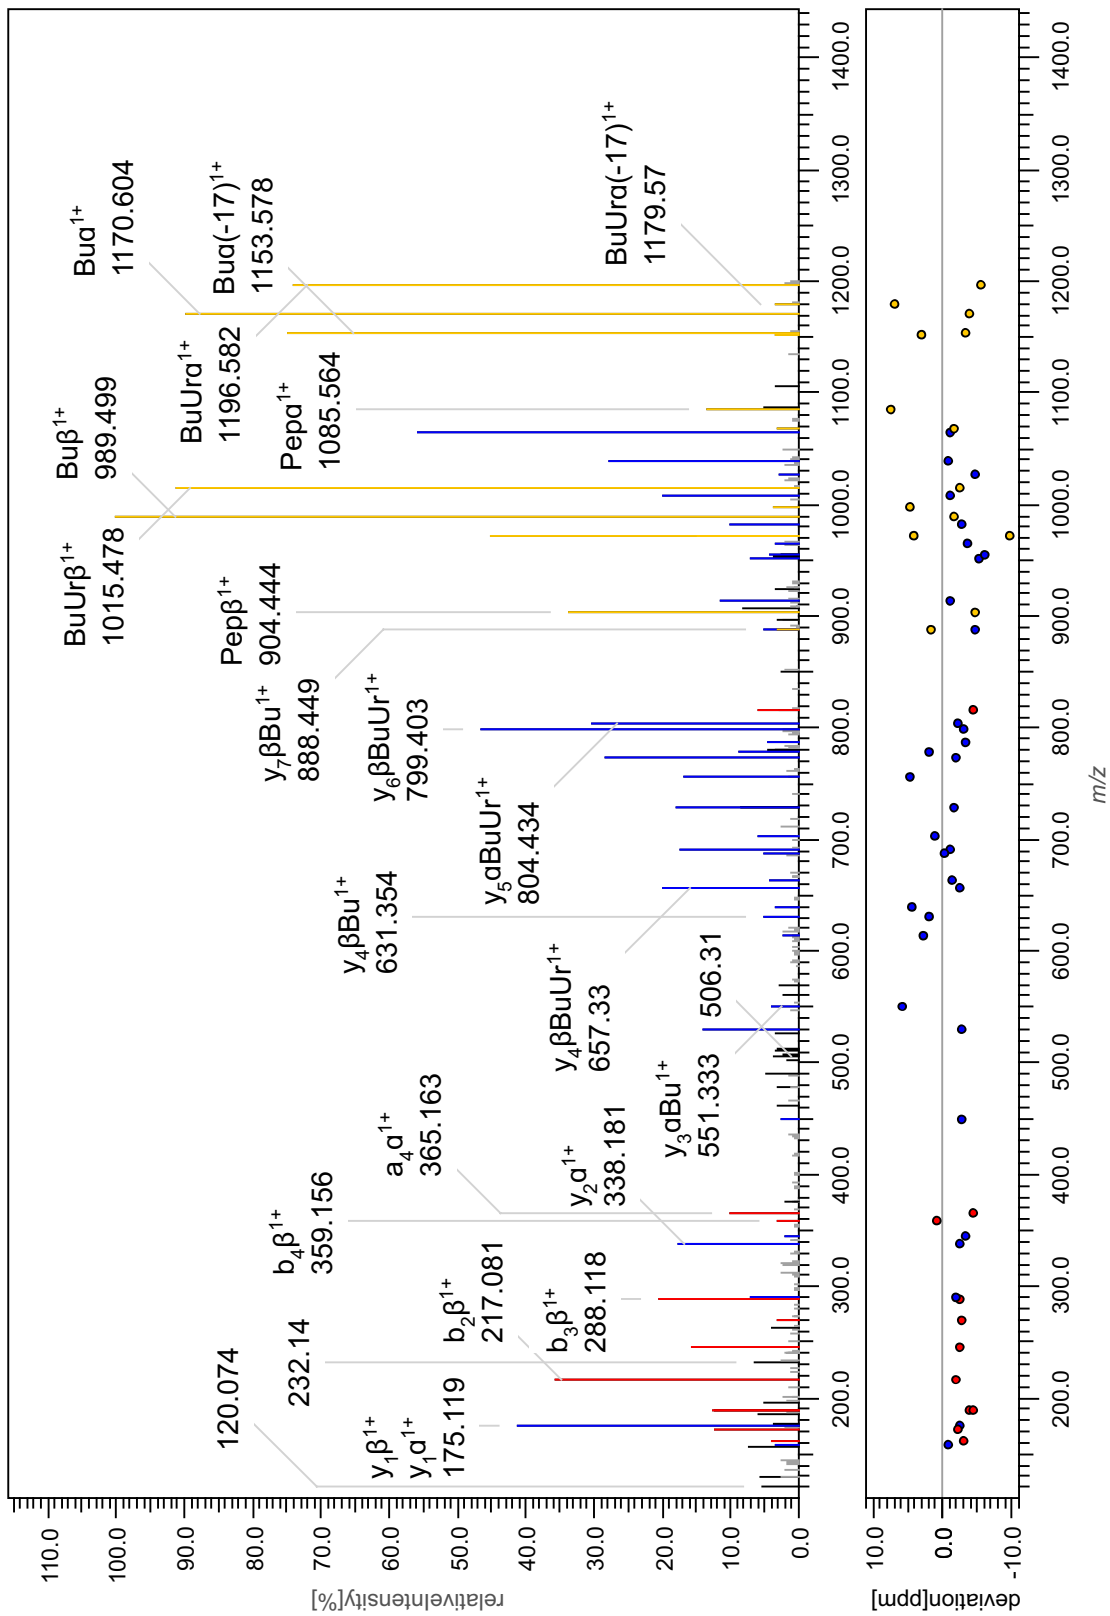



SurA K395  
OmpX K71

theor.Mass(M+H+): 3491.656  
PrecursorMass(M+H+): 3491.649  
Deviation: -1.93ppm  
m/z: 873.6678  
Charge: +4

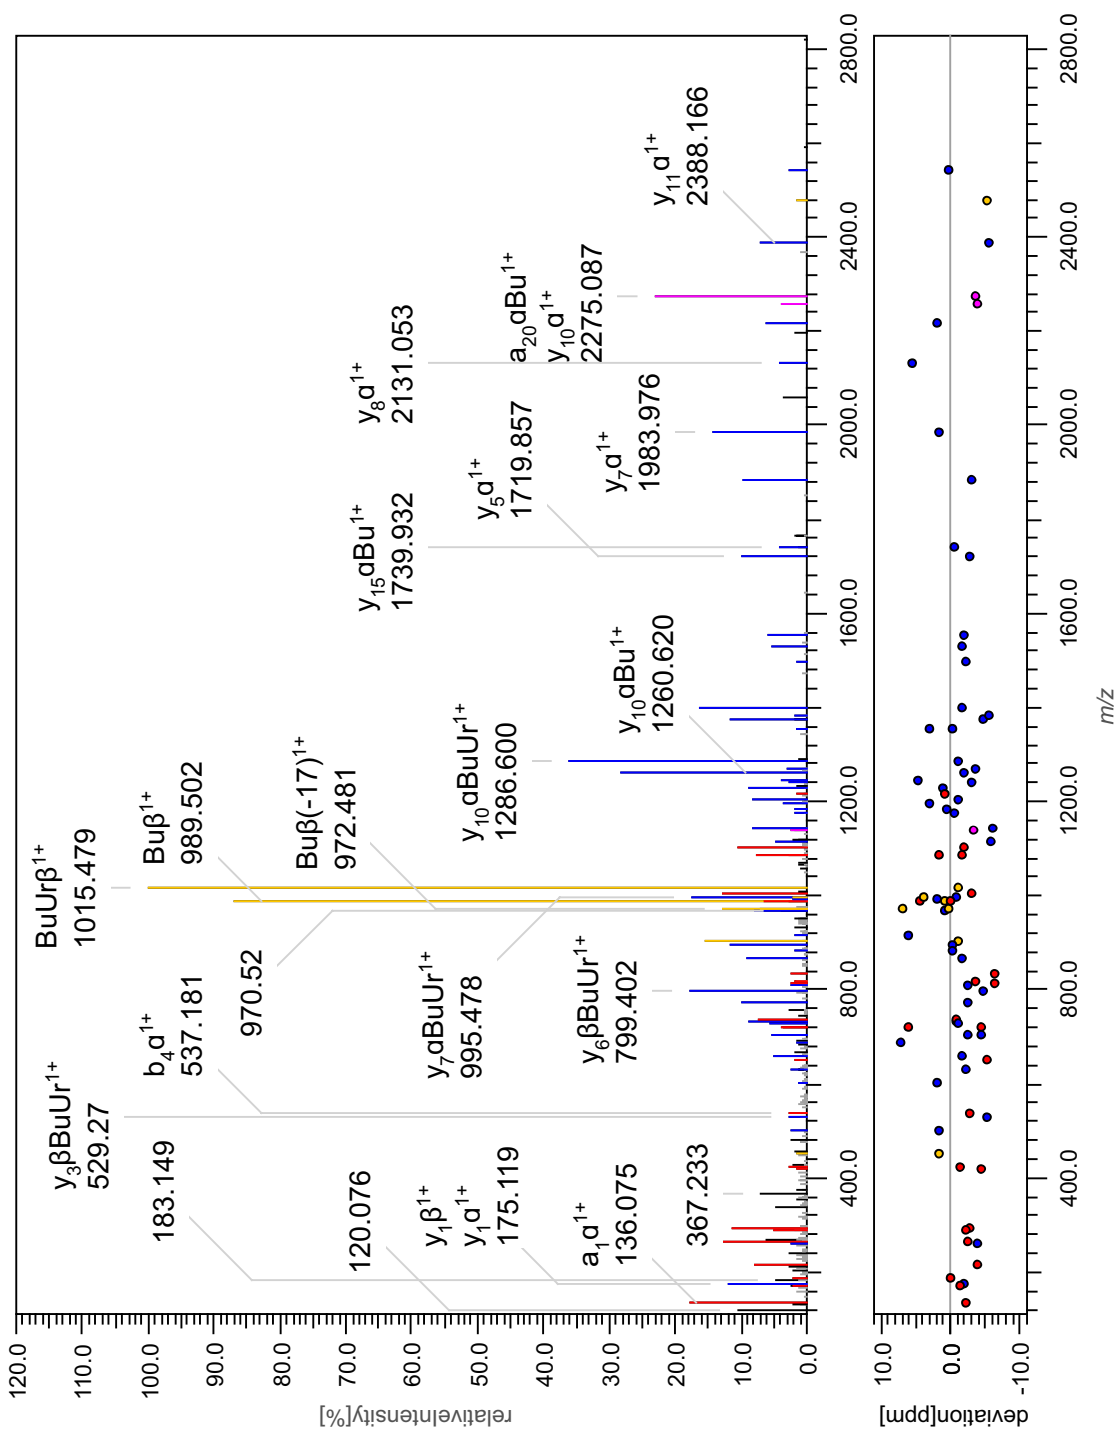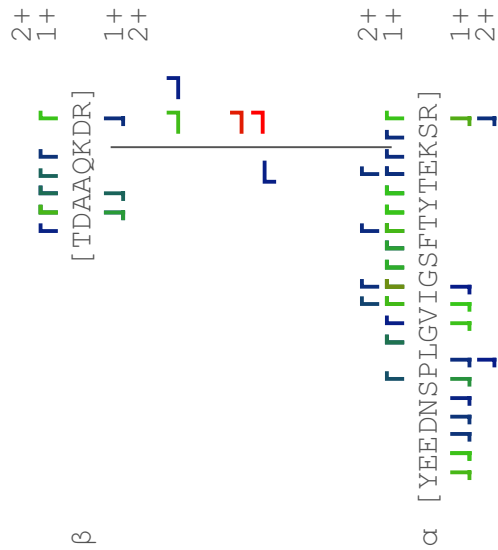

SurA K395  
OmpX K82

theor.Mass(M+H+): 3496.636  
 PrecursorMass(M+H+): 3496.618  
 Deviation: -5.17 ppm  
 m/z: 874.91003  
 Charge: +4

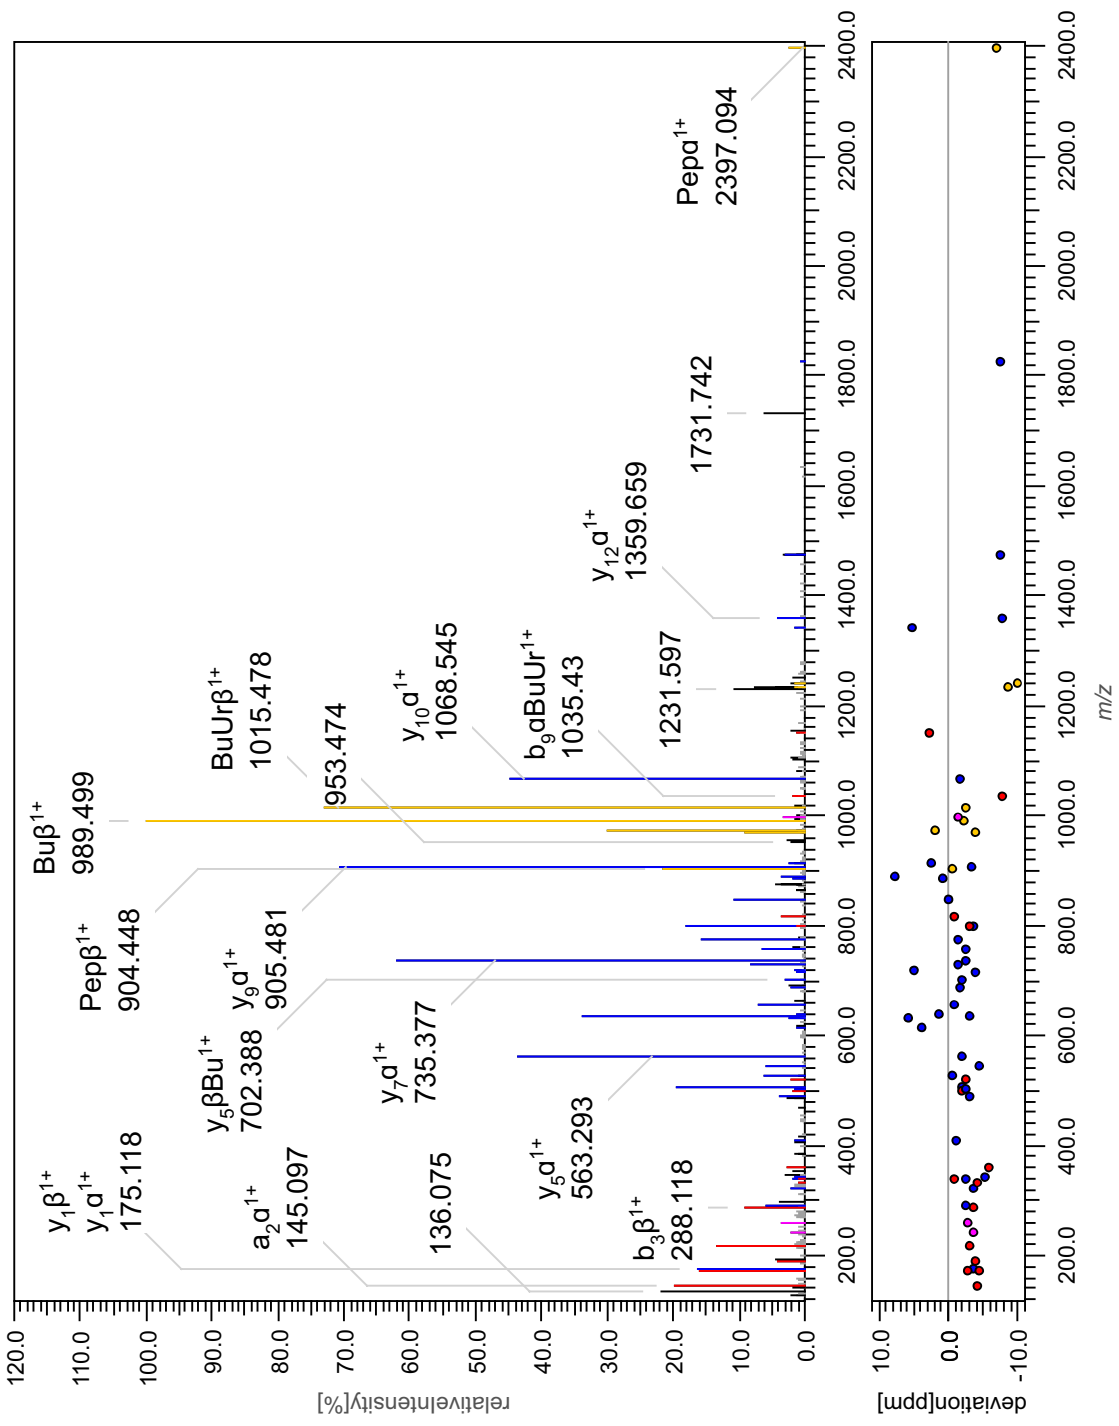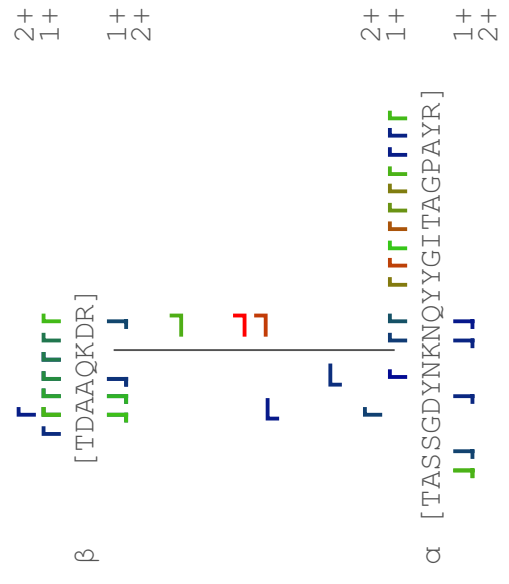

rel.intensity  
0% 100%

SurA K406  
OmpX K71

theor.Mass(M+H+):4313.993  
PrecursorMass(M+H+):4313.985  
Deviation:-1.99ppm  
m/z:1079.2516  
Charge:+4

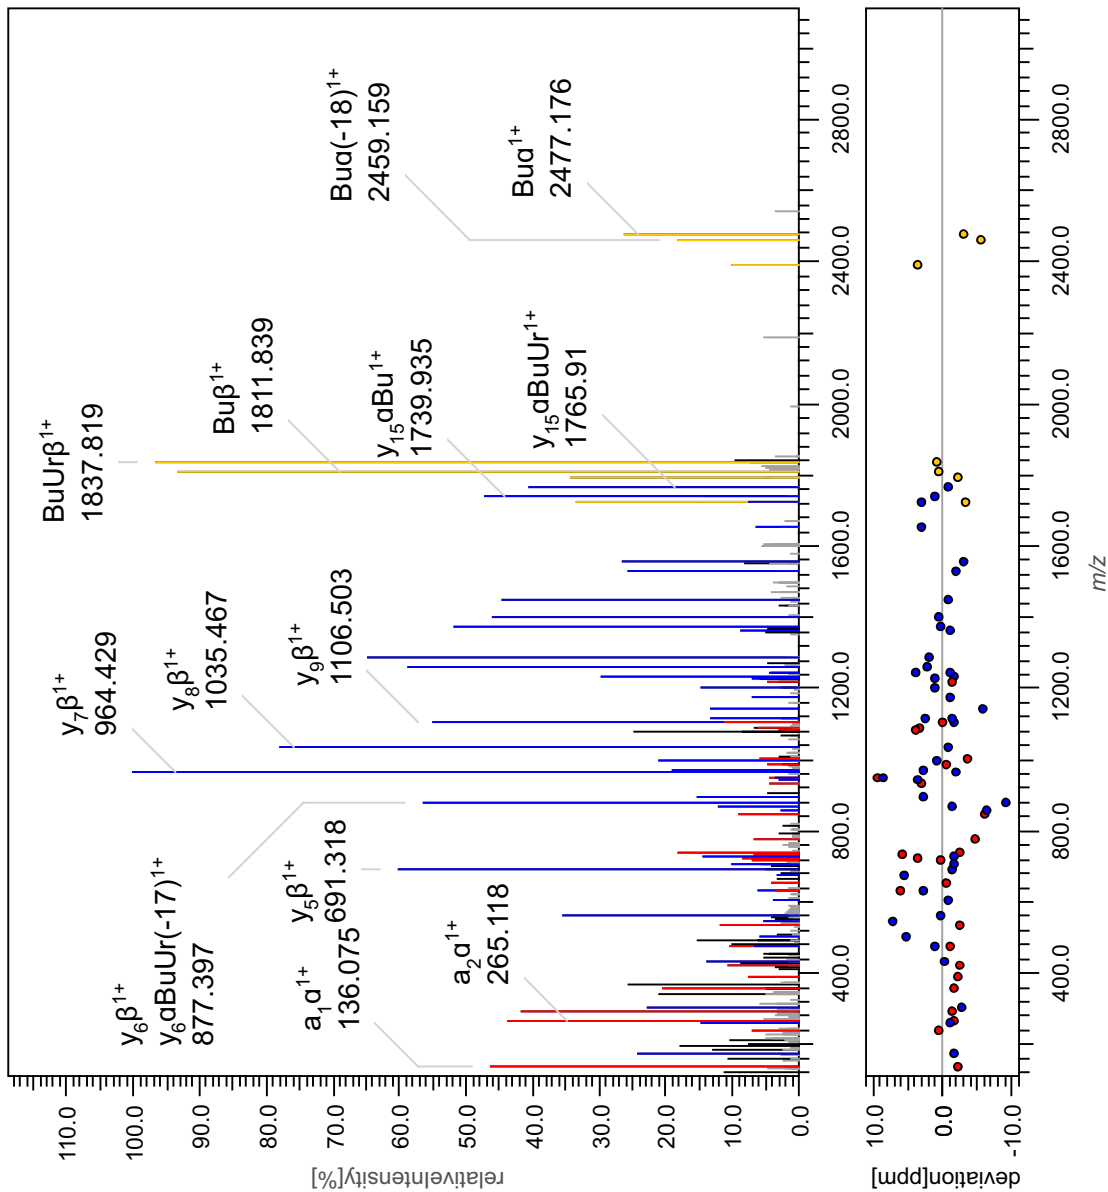

SurA K406  
OmpX K82

theor.Mass(M+H+):4318.973  
PrecursorMass(M+H+):4318.97  
Deviation:-0.76ppm  
m/z:1080.498  
Charge:+4

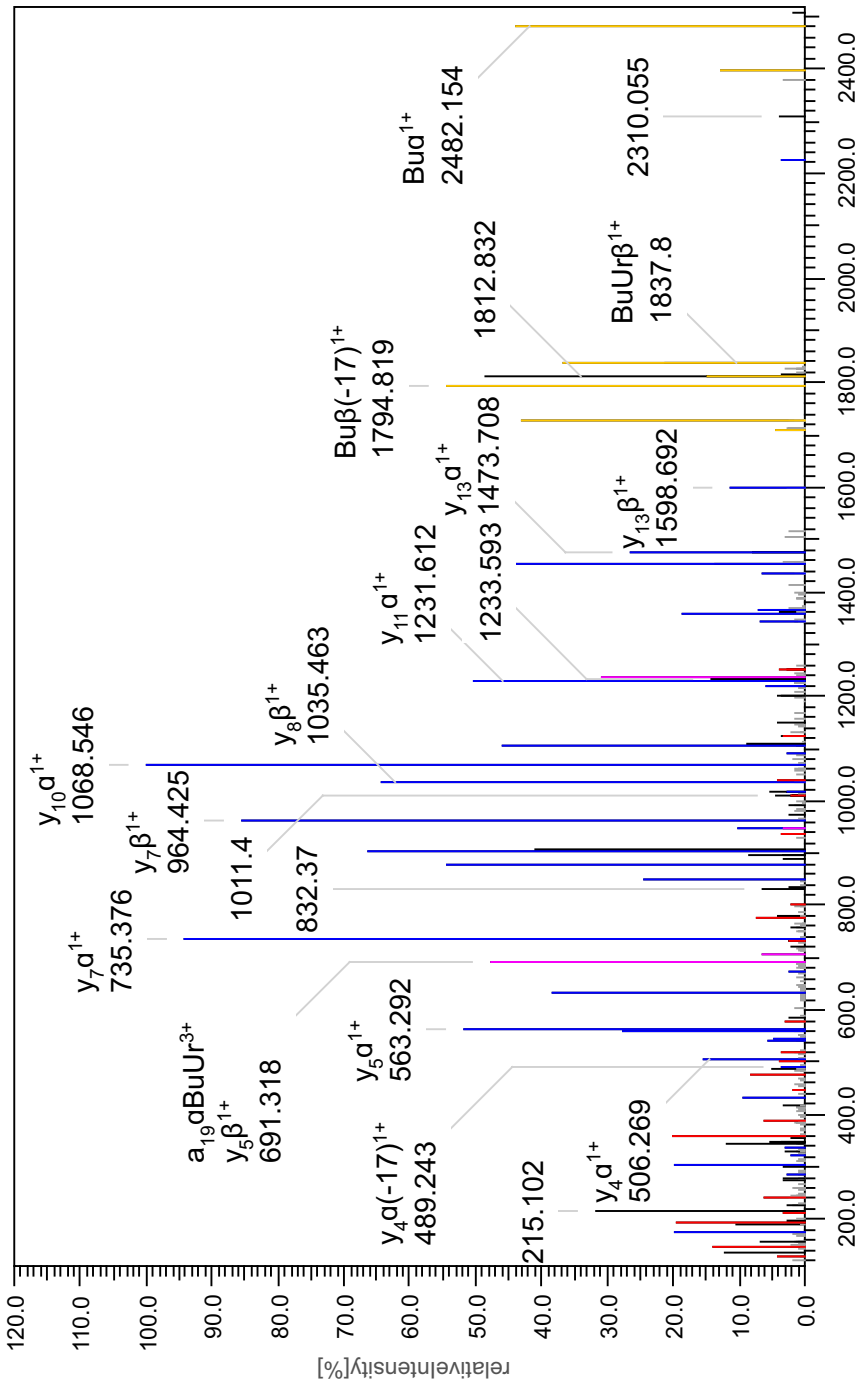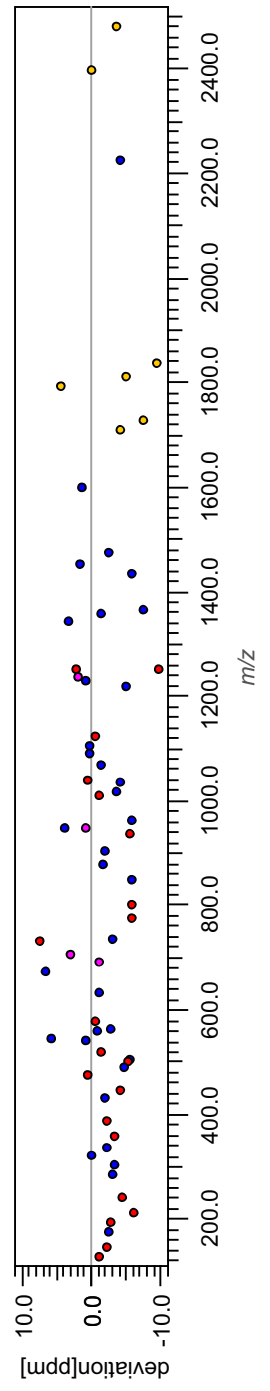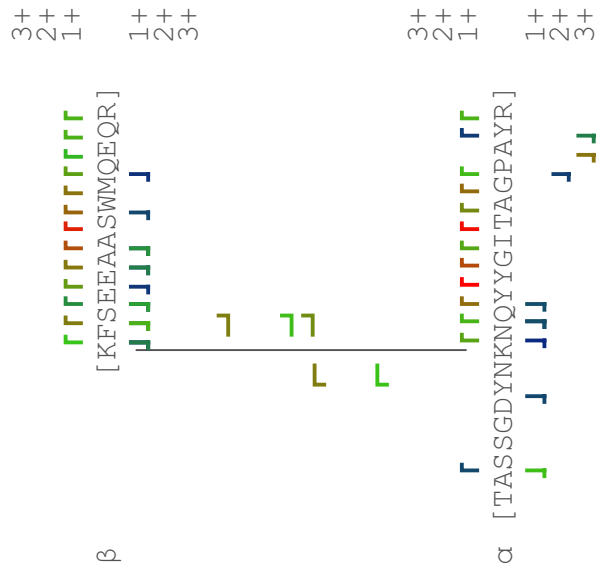

SurA K425  
OmpX K82

theor.Mass(M+H+):3657.782  
PrecursorMass(M+H+):3657.768  
Deviation:-3.84ppm  
m/z:1219.9275  
Charge:+3

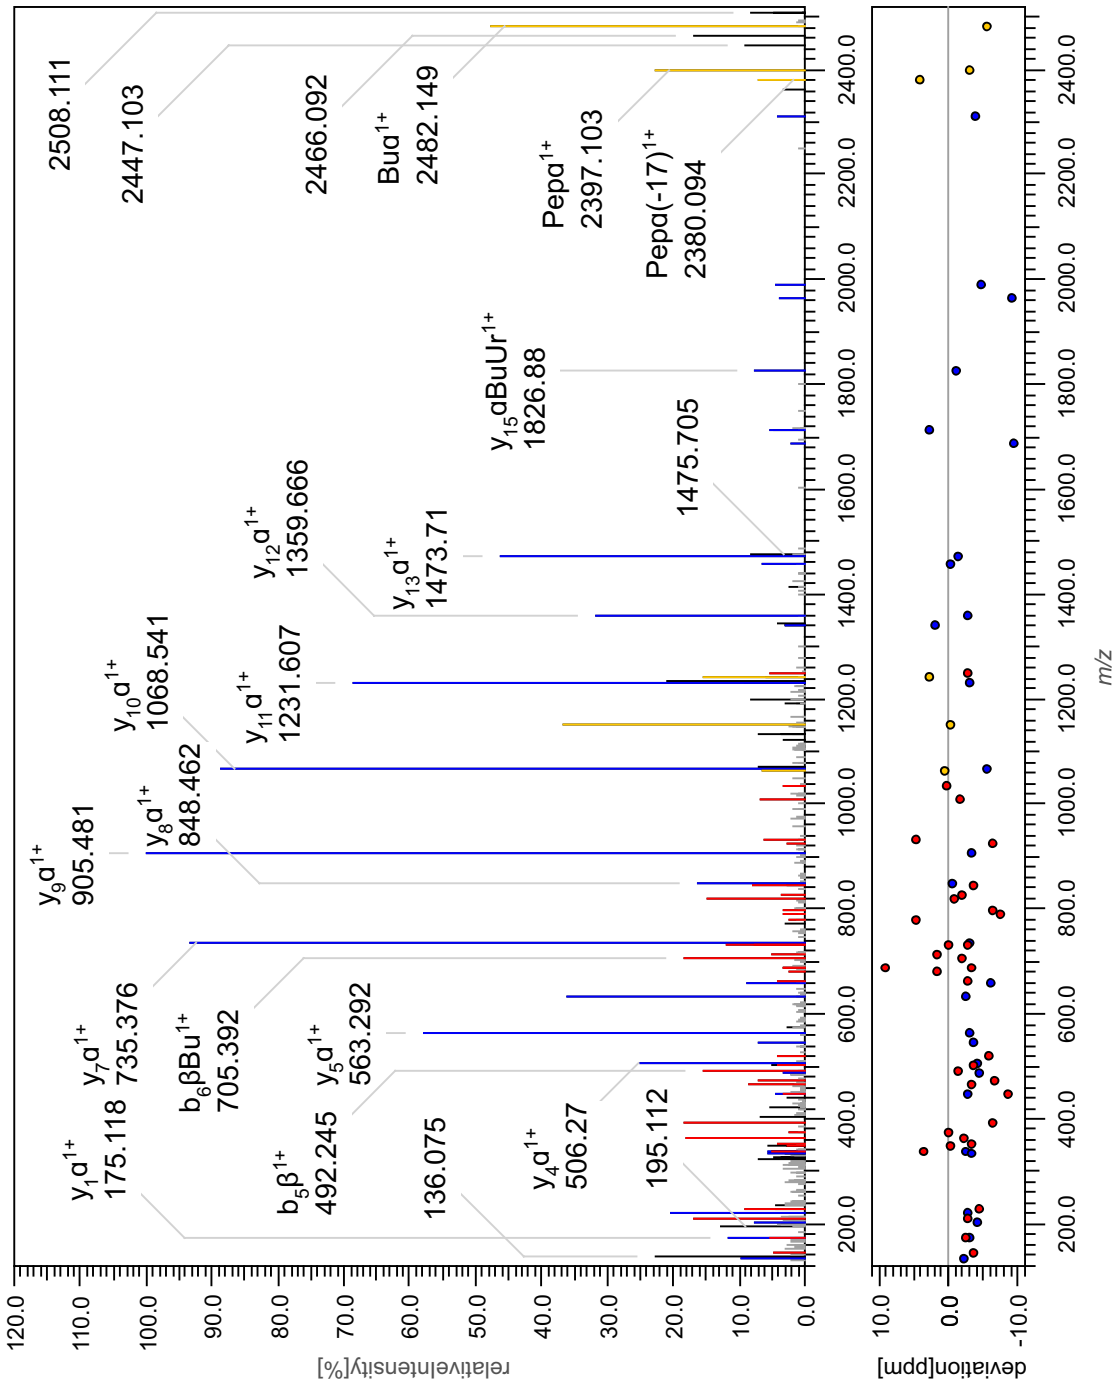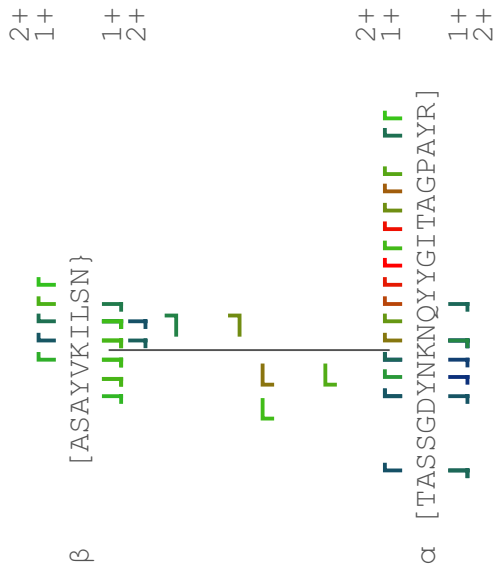

0% rel.intensity 100%

XL-MS spectra of tag-transfer crosslinks detected between SurA and OmpX.

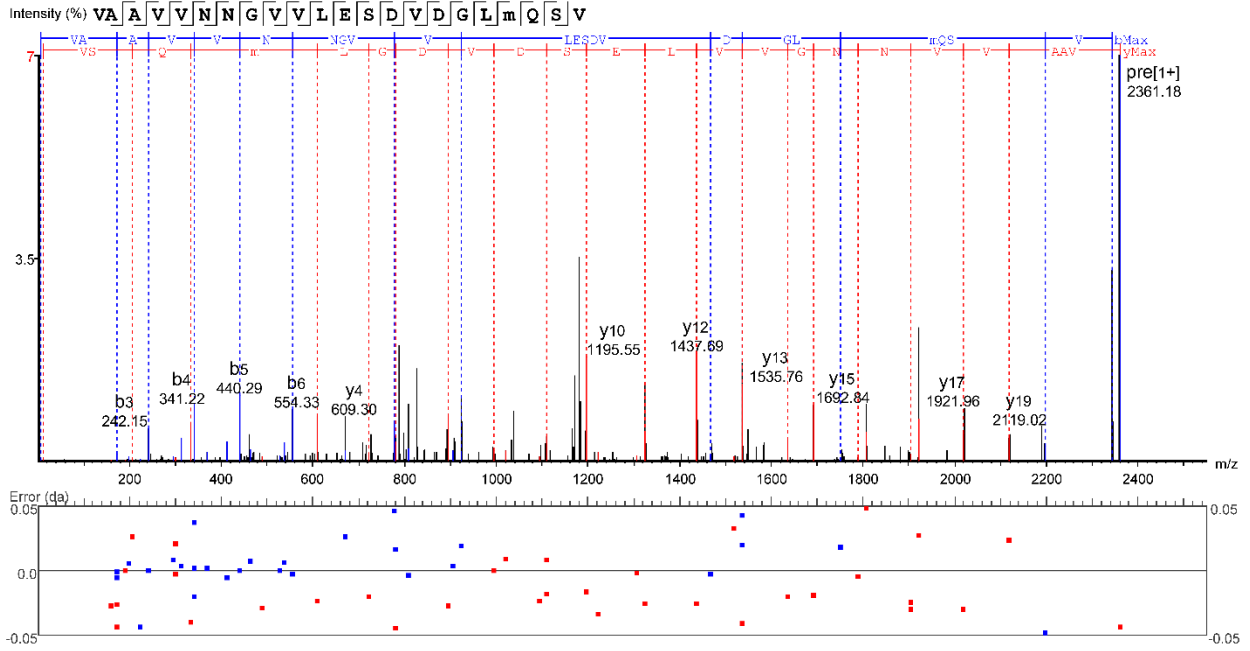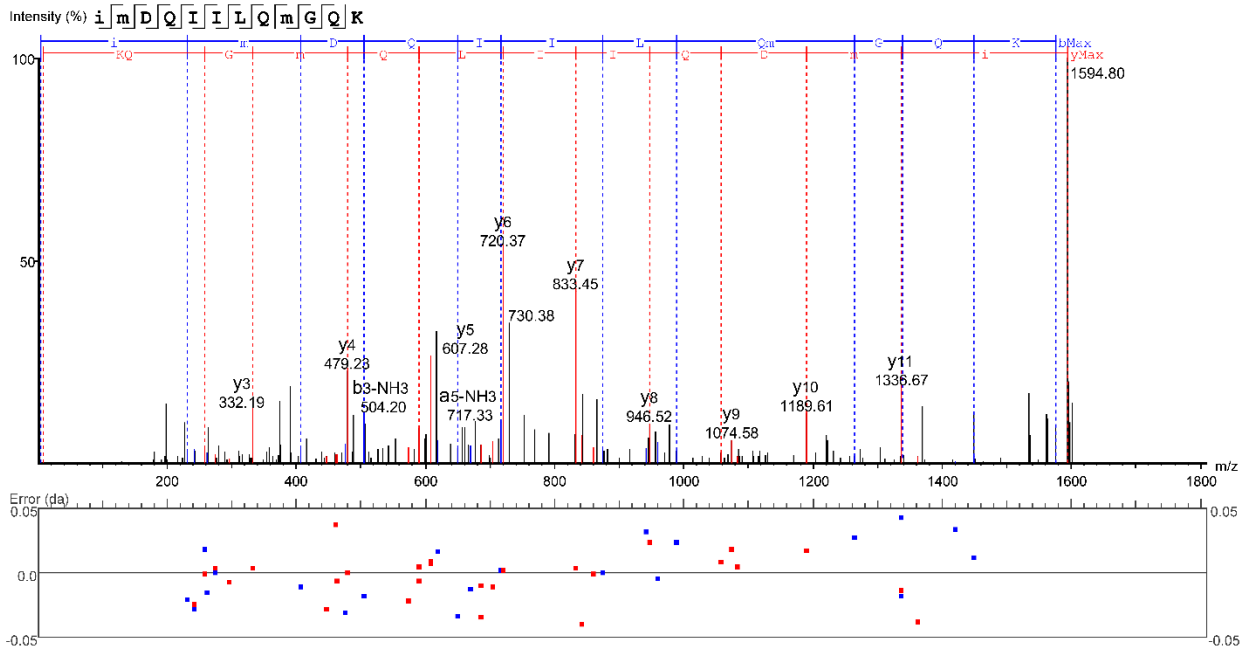

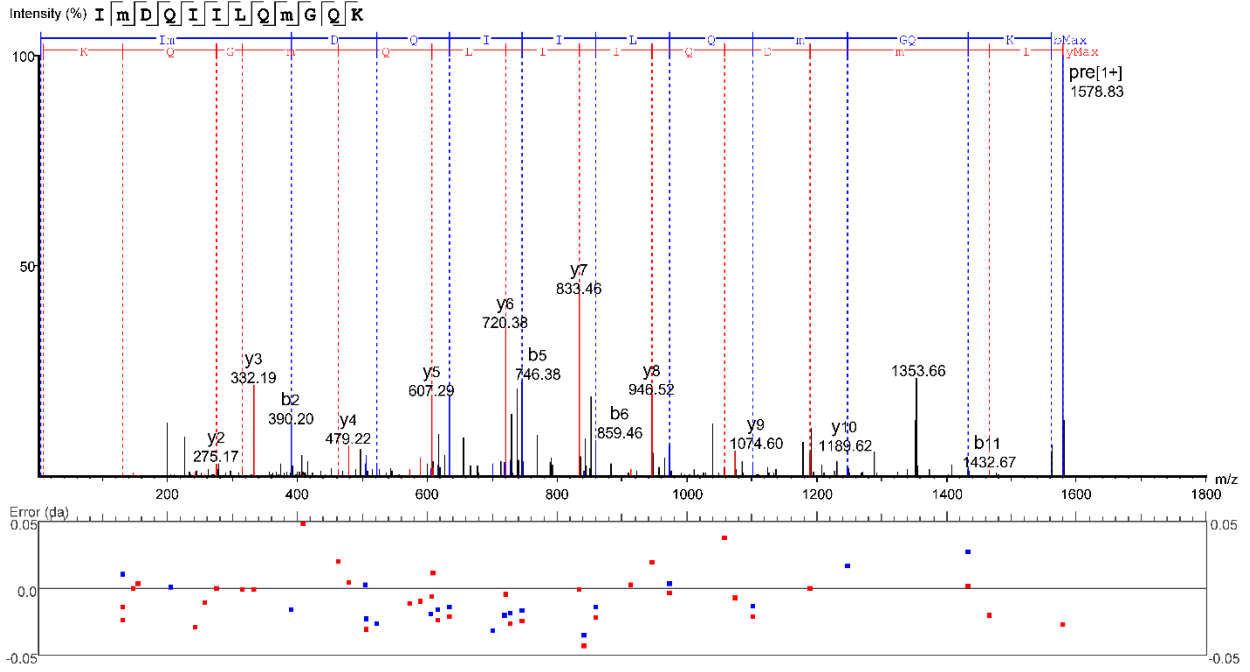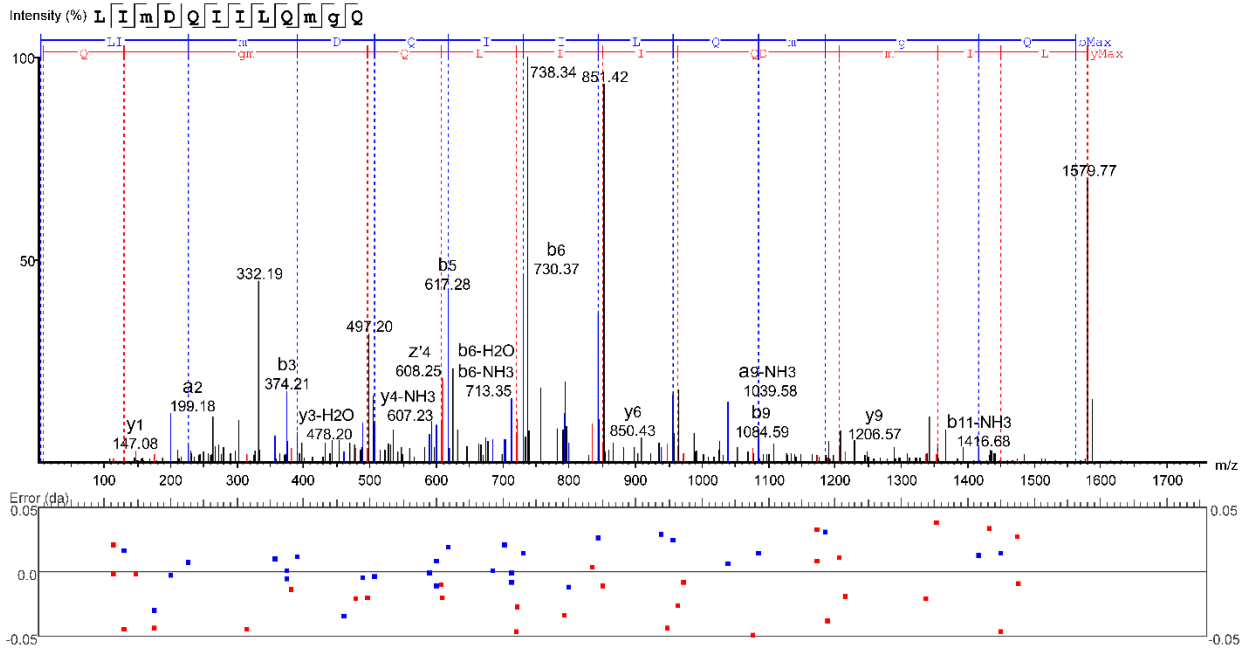



Intensity (%) I m D Q I I L Q m G Q K

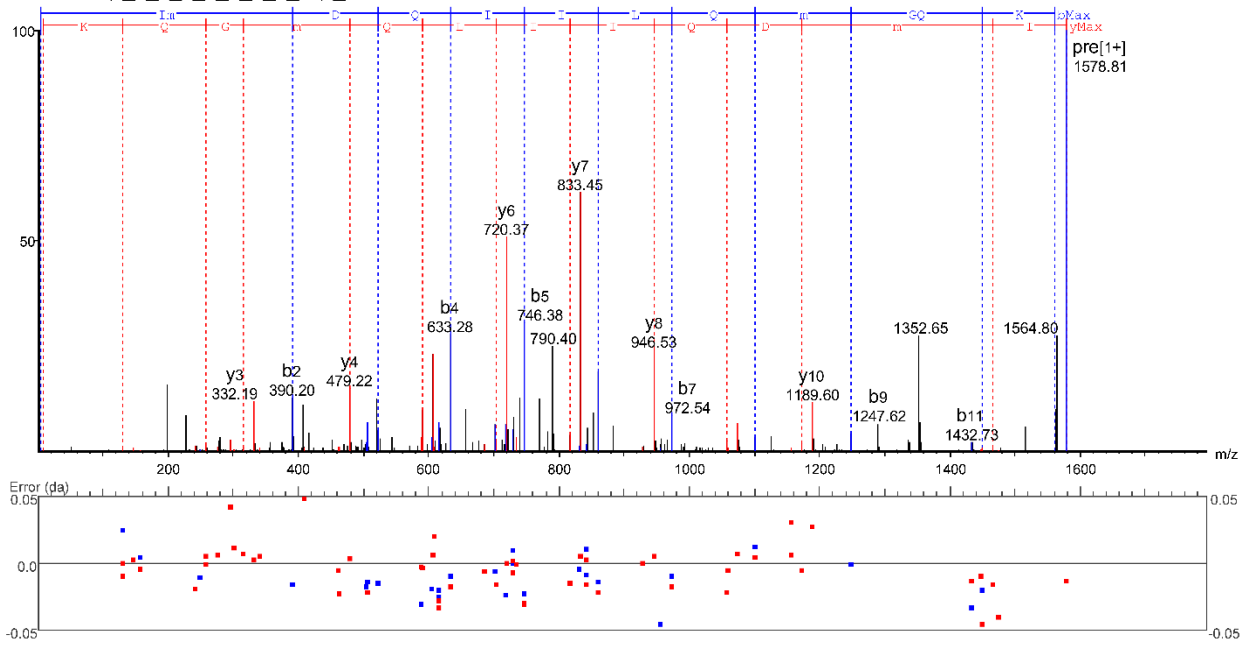

Intensity (%) s D E Q L D Q A I A N I A K

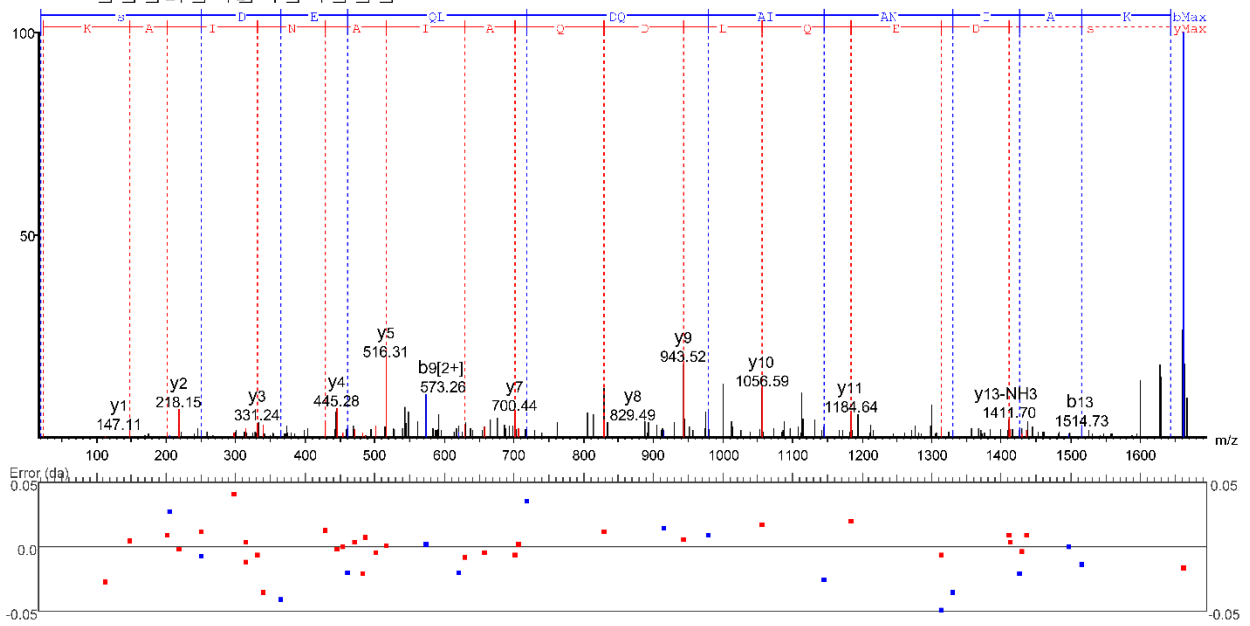

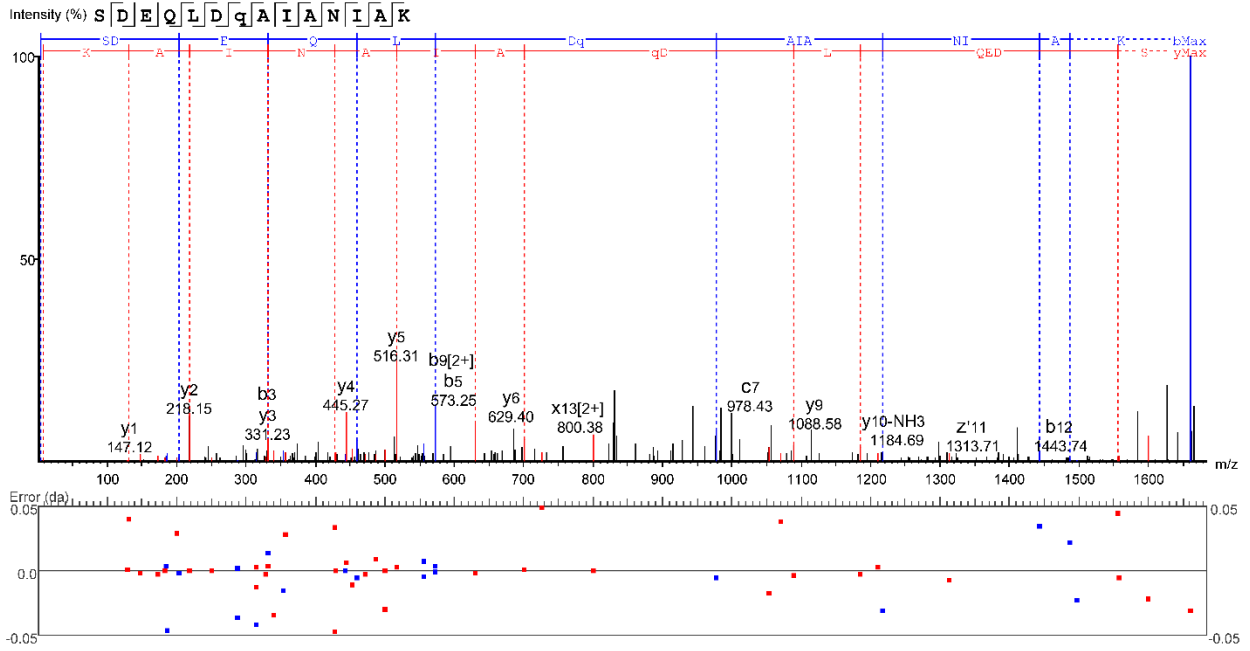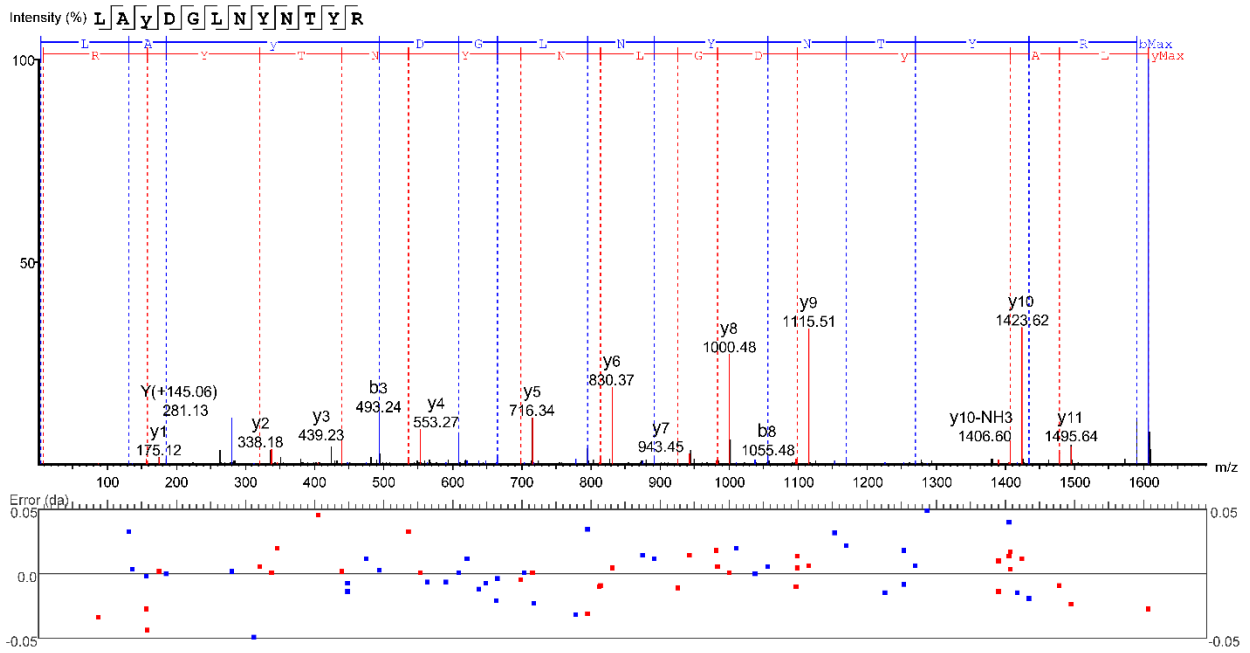

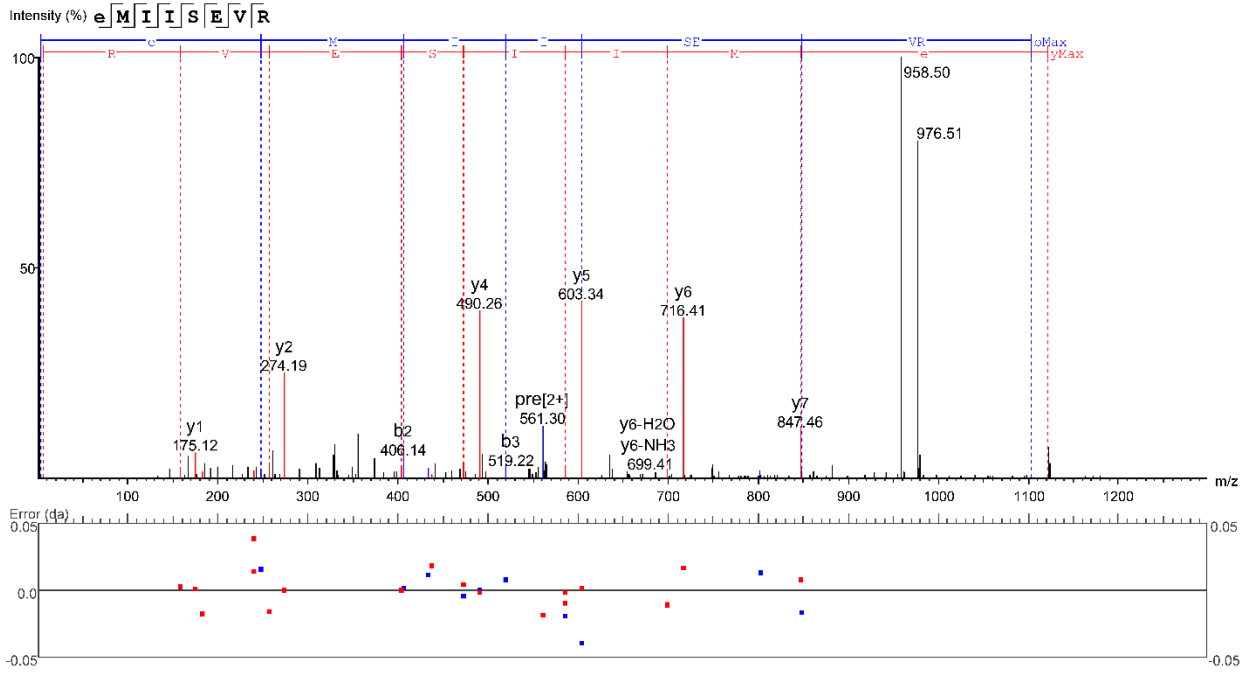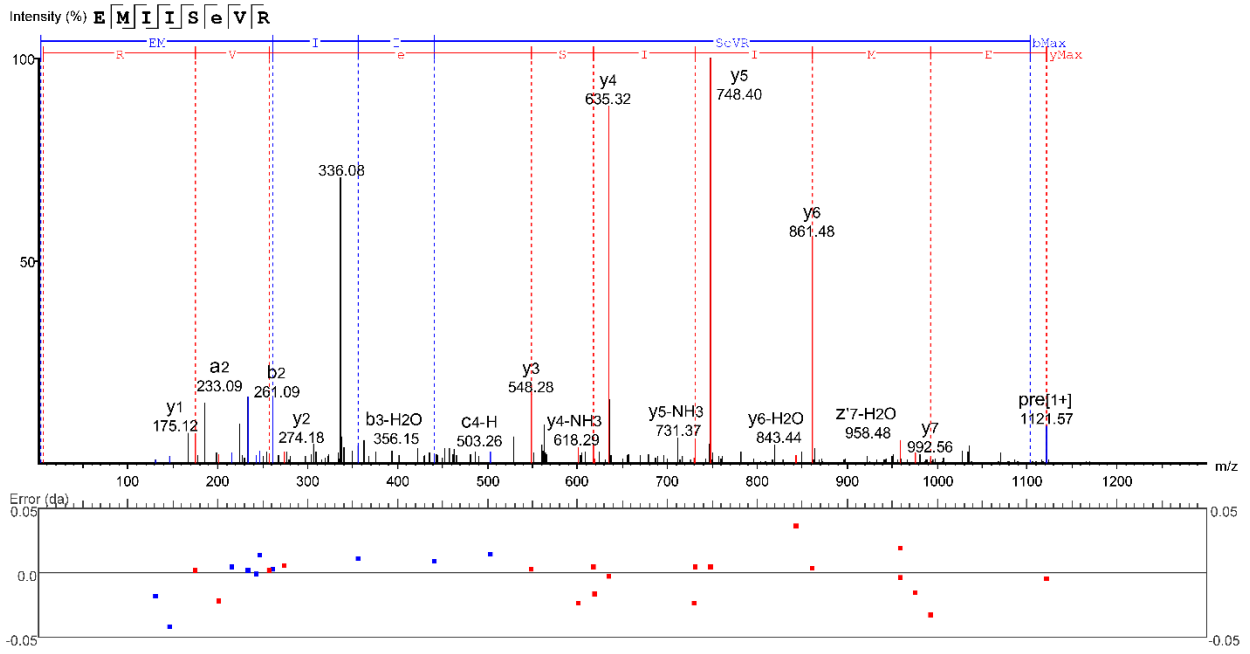

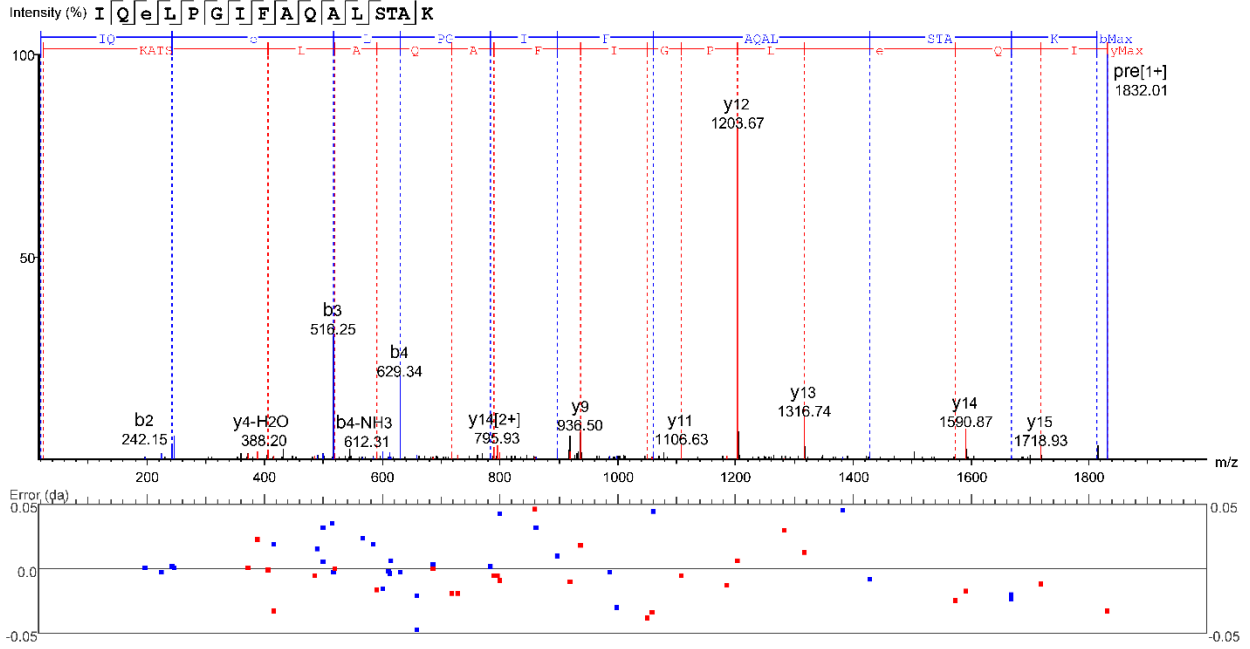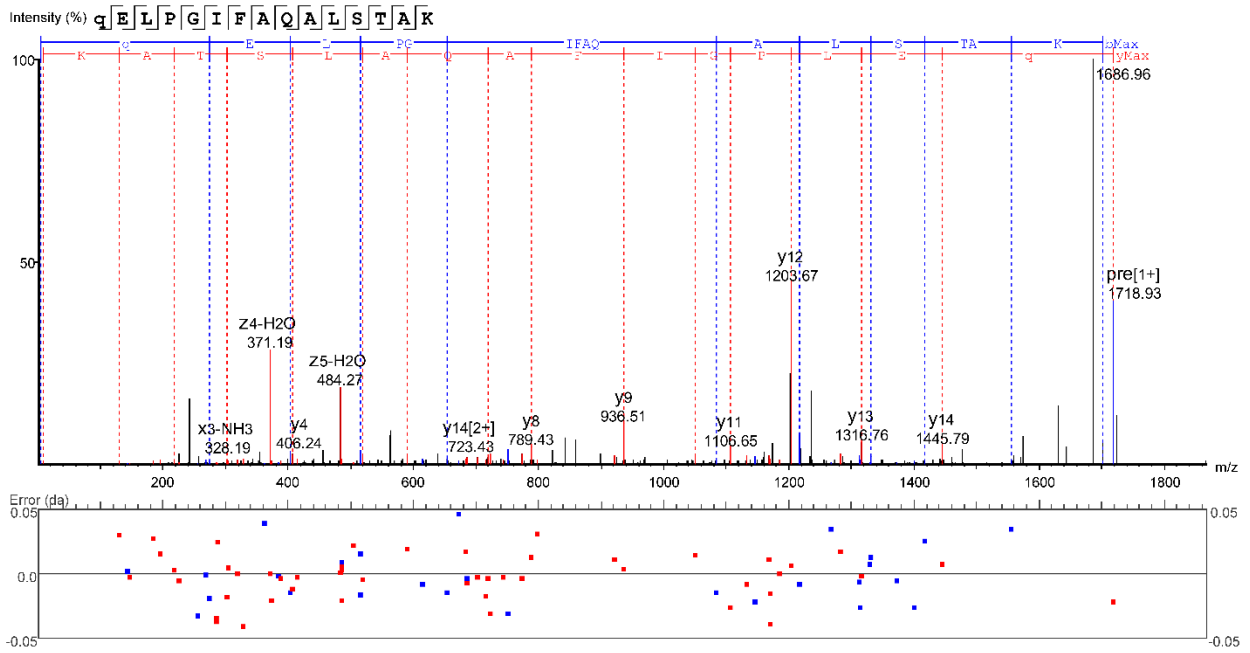

Supplement: 41467_2020_15702_MOESM6_ESM.pdf [file 41467_2020_15702_MOESM6_ESM.pdf]
